# Supplementary material for: Seasonal variation in the abundance and distribution of Anomalocardia flexuosa (Mollusca, Bivalvia, Veneridae) in an estuarine intertidal plain
Source: PeerJ. 2018 Feb 27;6:e4332. doi: 10.7717/peerj.4332 (PMC5833478; doi:10.7717/peerj.4332)
Supplement: Supplemental Information 1 — Field files. [file peerj-06-4332-s001.xls]

## Sheet: DADOS BRUTOS
			2009-03-01															2009-04-01													2009-05-01													2009-06-01
amostra/coordenada geográfica	número da placa	peso placa	peso total	PT	peso úmido concha	p úmido carne+placa	peso úmido	comp(mm)	peso seco carne	peso seco carne	peso seco concha	número de indivíduos	amostra/coordenada geográfica	número da placa	peso placa	peso total	PT	peso úmido concha	p úmido carne	peso úmido	comp(mm)	peso seco carne	peso seco	peso seco concha	número de indivíduos		amostra/coordenada geográfica	número da placa	peso placa	peso total	peso úmido concha	p úmido carne	peso úmido	comp(mm)	peso seco carne	peso seco	peso seco concha	número de indivíduos		número da placa	peso placa	peso total		peso úmido concha	p úmido carne	p úmido carne	comp(mm)	peso seco carne	peso seco
A1												0	A1													12		a1											4	A1
A2												3		45	42.428	44.513	2.085	1.898	42.575	0.147	17.81	42.478	0.05	1.849				76	58.821	61.521	2.046	59.374	0.553	18.26	58.887	0.066	1.941			59	27.299	31.095	3.796	2.85	28.159	0.86	22.15	27.396	0.097
	1	9.704	3.559	3.559	2.511	10.39	0.686	21.41	9.786	0.082	2.431			46	44.575	47.809	3.234	2.764	44.941	0.366	20.44	44.651	0.076	2.693				20	51.479	52.043	0.442	51.596	0.117	11.47	51.501	0.022	0.407			54	28.834	31.645	2.811	2.199	29.407	0.573	20.49	28.904	0.07
	2	9.285	0.011	0.011				3.3		0.01				67	44.525	47.518	2.993	2.649	44.777	0.252	20.28	44.591	0.066	2.504				47	42.958	43.78	0.66	43.05	0.092	13.18	42.974	0.016	0.635			34	48.526	51.06	2.534	2.01	49.015	0.489	19.32	48.585	0.059
	3	9.471	0.015	0.015				3.13		0.01				24	25.063	28.127	3.064	2.241	25.714	0.651	19.54	25.161	0.098	2.153				78	67.799	69.973	1.7	68.066	0.267	17.19	67.834	0.035	1.643			55	29.255	32.556	3.301	2.536	29.937	0.682	19.29	29.303	0.048
														30	43.393	45.465	2.072	1.756	43.662	0.269	19.45	43.473	0.08	1.74																28	43.271	45.971	2.7	1.979	43.889	0.618	18.93	43.348	0.077
														42	42.249	44.316	2.067	1.734	42.501	0.252	17.1	42.302	0.053	1.652												biomassa total: 0.139				27	43.262	46.08	2.818	2.306	43.7	0.438	18.64	43.317	0.055
																0.232	0.232	0.232			9.29		0.01													Biomassa >20mm: 0				39	60.962	63.905	2.943	2.145	61.639	0.677	18.08	61.018	0.056
																0.152	0.152	0.152			8.12		0.01					a2											0	51	29.702	32.18	2.478	2.062	30.089	0.387	17.8	29.748	0.046
A3												21				0.115	0.115	0.115			6.94		0.01																	50	31.497	34.009	2.512	1.981	31.968	0.471	17.74	31.549	0.052
																	0																										0
																	0																										0
																	0																										0
																	0																										0
	24	25.063	25.107	0.044				3.88		0.01						0.11	0.11	0.11			6.52		0.01					a3											8	20	51.479	53.218	1.739	1.351	51.794	0.315	16.04	51.524	0.045
	23	28.752	28.779	0.027				4.56		0.01						0.064	0.064	0.064			5.71		0.01					1	9.704	10.466	0.677	9.769	0.065	13.1	9.716	0.012	0.653			56	20.103	21.963	1.86	1.445	20.476	0.373	16.03	20.123	0.02
	22	26.702	26.814	0.112				6.27		0.01						0.034	0.034	0.034			4.5		0.01					3	9.471	12.028	2.165	9.8	0.329	19.55	9.534	0.063	2.117			18	17.694	18.876	1.182	0.931	17.911	0.217	14.83	17.709	0.015
	21	15.265	15.364	0.099				6.5		0.01							0						biomassa total: 0.483					4	9.733	13.458	3.209	10.171	0.438	22.99	9.802	0.069	3.143			66	41.648	42.197	0.549	0.297	42.387	0.739	10.97	41.65	0.002
	20	51.479	51.621	0.142	0.09	49.632		6.97		0.01	0.092						0						biomassa >20mm:0.140					5	9.048	12.756	3.193	9.478	0.43	20.59	9.111	0.063	3.097			43	42.312	42.715	0.403	0.442	42.714	0.402	10.27	42.32	0.008
																	0											7	9.075	12.283	2.76	9.472	0.397	21.59	9.142	0.067	2.669						0
																	0											8	16.073	19.592	2.872	16.608	0.535	22.94	16.132	0.059	2.709						0
																	0											9	9.316	12.426	2.639	9.74	0.424	22.23	9.398	0.082	2.543						0
																	0											10	17.712	20.779	2.575	18.15	0.438	20.46	17.761	0.049	2.408						0
																	0																										0
																	0																			biomassa total: 0.464							0
																	0																			Biomassa >20mm: 0.389							0
																	0											a4											7				0
	7	9.075	9.253	0.178	0.118	9.093	0.018	7.4	9.079	0.004	0.11		A2				0									6		11	21.906	25.432	2.999	22.374	0.468	23.16	21.988	0.082	2.936					0.262	0.262				9.09		0.01
	19	20.108	20.317	0.209	0.153	20.119	0.011	8.37		0.01	0.155			31	31.403	33.318	1.915	1.442	31.718	0.315	16.64	31.448	0.045	1.382				12	15.025	17.578	2.136	15.338	0.313	18.43	15.064	0.039	2.054					0.21	0.21				8.42		0.01
	14	17.816	18.127	0.311	0.244	17.843	0.027	9.16	17.823	0.007	0.245			63	43.292	48.019	4.727	3.508	44.307	1.015	23.04	43.384	0.092	3.31				13	18.501	21.542	2.646	18.807	0.306	19.68	18.56	0.059	2.572					0.141	0.141				8.09		0.01
	15	16.476	16.82	0.344	0.258	16.488	0.012	9.68	16.472	0.004	0.259			56	20.103	22.92	2.817	2.163	20.646	0.543	19.07	20.16	0.057	2.059				14	17.816	20.407	2.122	18.171	0.355	17.45	17.86	0.044	2.037					0.125	0.125				6.73		0.01
	17	18.908	19.373	0.465	0.339	18.947	0.039	10.94	18.921	0.013	0.331			57	28.246	31.837	3.591	2.667	29.055	0.809	20.69	28.335	0.089	2.534				15	16.476	18.808	1.981	16.774	0.298	19.31	16.51	0.034	1.901					0.066	0.066				6.1		0.01
																	0																										0
	18	17.694	18.228	0.534	0.418	17.735	0.041	11.1	17.695	0.01	0.409			58	30.493	32.697	2.204	1.71	30.862	0.369	17.46	30.539	0.046	1.637				16	16.95	20.463	2.969	17.435	0.485	22.81	17.002	0.052	2.863					0.07	0.07				5.85		0.01
	6	9.776	12.058	2.282	1.702	10.083	0.307	17.53	9.84	0.064	1.664			30	43.393	47.597	4.204	3.072	44.356	0.963	21.7	43.518	0.125	2.962				17	18.908	20.91	1.697	19.147	0.239	17.2	18.957	0.049	1.642					0.061	0.061				5.38		0.01
	5	9.048	11.254	2.206	1.617	9.365	0.317	18.01	9.106	0.058	1.574						0						biomassa total: 0.454													biomassa total: 0.359						0.029	0.029				4.26		0.01
	16	16.95	19.846	2.896	2.159	17.327	0.377	18.41	17.012	0.062	2.126						0						biomassa >20mm: 0.306													Biomassa >20mm: 0.082				A2			0
	9	9.316	11.761	2.445	1.773	9.792	0.476	18.69	9.38	0.064	1.725						0																							69	41.512	44.211	2.699	2.404	41.79	0.278	19.32	41.553	0.041
	4	9.733	12.85	3.117	2.384	10.088	0.355	18.74	9.805	0.072	2.343		A3				0									7		a5											0	72	39.894	41.377	1.483	1.403	40.067	0.173	15.38	39.864	0.01
	8	16.073	19.429	3.356	2.517	16.501	0.428	19.49	16.136	0.063	2.493			1	9.704	12.741	3.037	2.342	10.263	0.559	19.58	9.786	0.082	2.26																42	42.249	42.697	0.448	0.384	42.303	0.054	11.22	42.262	0.013
																	0																										0
	11	21.906	25.629	3.723	2.732	22.539	0.633	20.17	22.007	0.101	2.649			2	9.285	13.983	4.698	2.871	9.919	0.634	21.08	9.378	0.093	2.801				a6											0			0.119	0.119				6.82		0.01
	12	15.025	17.67	2.645	2.314	15.437	0.412	20.19	15.093	0.068	2.113			3	9.471	12.549	3.078	2.329	10.082	0.611	18.57	9.56	0.089	2.297																		0.046	0.046				4.99		0.01
	10	17.712	22.231	4.519	3.291	18.456	0.744	22.3	17.826	0.114	3.234			4	9.733	10.151	0.418	0.349	9.77	0.037	11.08	9.759	0.026	0.343																		0.069	0.069				5.92		0.01
	13	18.501	22.707	4.206	2.736	18.987	0.486	23.47	18.575	0.074	2.692			5	9.048	9.954	0.906	0.732	9.149	0.101	13.37	9.079	0.031	0.701				a7											5			0.077	0.077				6.4		0.01
			xPT>20mm=	3.77325										7	9.075	0.146	-8.929	0.146			7.51		0.01					16	16.95	20.943	3.469	17.405	0.455	23.33	17.049	0.099	3.335			A3			0
										bio total=0.838						0.029	0.029	0.029			4.52		0.01					17	18.908	22.23	2.849	19.291	0.383	21.8	18.985	0.077	2.775			57	28.246	30.302	2.056	1.587	28.651	0.405	17.05	28.265	0.019
										bio >20mm=0.357							0						biomassa total: 0.341					18	17.694	20.509	2.411	17.989	0.295	20.33	17.732	0.038	2.357			58	30.493	32.911	2.418	1.908	30.913	0.42	17.04	30.529	0.036
A4												6					0						biomassa >20mm: 0.093					56	20.103	23.642	3.092	20.476	0.373	20.76	20.16	0.057	3.026			59	27.299	29.819	2.52	1.975	27.775	0.476	17.76	27.37	0.071
	25	51.794	54.767	2.973	2.229	52.252	0.458	19.07	51.851	0.057	2.18		A4				0									3		21	15.265	17.349	1.524	15.628	0.363	18.36	15.319	0.054	1.454			60	43.459	0.083	-43.376				5.8		0.01
																	0																									0.008	0.008				2.67		0.01
	26	26.902	29.191	2.289	1.689	27.14	0.238	17.26	26.943	0.041	1.66			67	44.525	47.012	2.487	2.131	37.63	0.356	20.06	44.6	0.075	2.346												biomassa total: 0.325				A4			0
	27	43.262	45.568	2.306	1.672	43.528	0.266	18.25	43.302	0.04	1.632			39	60.962	63.678	2.716	2.286	61.351	0.389	18.6	61.021	0.059	2.127												Biomassa >20mm: 0.271				58	30.493	34.457	3.964	2.912	31.399	0.906	21.34	30.573	0.08
	28	43.271	44.969	1.698	1.288	43.62	0.349	15.14	43.312	0.041	1.269			35	43.461	45.153	1.692	1.388	43.744	0.283	16.98	43.515	0.054	1.352																60	43.459	48.14	4.681	3.714	44.306	0.847	25.64	43.545	0.086
	29	33.418	33.639	0.221	0.165	33.442	0.024	9	33.424	0.01	0.176						0						biomassa total: 0.188					a8											7	61	43.34	46.809	3.469	2.704	43.966	0.626	20.21	43.415	0.075
	30	43.393	43.444	0.051				5.05		0.01							0						biomassa >20mm: 0.075					1	9.704	12.92	2.39	10.211	0.507	20.69	9.76	0.056	2.329			62	43.107	47.318	4.211	2.952	44.104	0.997	22.64	43.183	0.076
			xPT>20mm=	0						bio total=0.199							0											2	9.285	12.783	2.91	9.786	0.501	23.09	9.352	0.067	2.855			63	43.292	46.647	3.355	2.243	44.274	0.982	21.22	43.363	0.071
			xPT<20mm=	2.3165						bio >20mm=0			A5				0									4		3	9.471	14.243	3.763	10.334	0.863	23.79	9.589	0.118	3.667			65	51.7	55.096	3.396	2.47	52.428	0.728	20.48	51.756	0.056
											.			22	26.702	28.956	2.254	1.892	26.916	0.214	17.13	26.757	0.055	1.857				4	9.733	14.228	3.522	9.969	0.236	21.47	9.856	0.123	3.356			17	18.908	22.663	3.755	2.72	19.884	0.976	21.48	18.982	0.074
A5												10		23	28.752	32.29	3.538	2.656	29.282	0.53	21.76	28.84	0.088	2.579				5	9.048	15.793	5.212	10.313	1.265	24.86	9.216	0.168	5.05			21	15.265	16.931	1.666	1.366	15.517	0.252	16.1	15.287	0.022
	2	9.285	10.224	0.939	0.748	9.368	0.083	13.2	9.299	0.014				24	25.063	27.493	2.43	1.922	25.36	0.297	18.36	23.329	0.173	1.871				7	9.075	14.259	3.771	10.294	1.219	23.55	9.202	0.127	3.585					0.036	0.036				4.75		0.01
	3	9.471	13.223	3.752	3.23	9.991	0.52	22	9.566	0.095				52	25.266	25.991	0.725	0.619	25.321	0.055	12.33	25.291	0.025	0.594				8	16.073	16.599	0.403	16.129	0.056	10.96	16.083	0.01	0.396			A5			0
	21	15.265	18.777	3.512	2.541	15.682	0.417	20.81	15.32	0.055							0						biomassa total: 0.188													biomassa total: 0.669				12	15.025	18.126	3.101	2.685	15.409	0.384	21.37	15.081	0.056
	22	26.702	29.746	3.044	2.231	27.293	0.591	19	26.79	0.088							0						biomassa >20mm: 0.088													Biomassa >20mm: 0.659				14	17.816	20.542	2.726	2.372	18.131	0.315	20.21	17.864	0.048
	23	28.752	31.402	2.65	2	29.036	0.284	19.35	28.806	0.054							0																							A6			0
	24	25.063	25.338	0.275				9.43		0.01			A6				0									19		a9											3				0
	30	43.393	45.526	2.133	1.524	43.808	0.415	17.4	43.421	0.028				A10	0.868	3.646	2.778	2.434	1.154	0.286	19.97	0.93	0.062	2.369				65	51.7	55.095	2.558	52.357	0.657	20.37	51.763	0.063	2.445			A7			0
	31	31.403	31.535	0.132				6.9		0.01				A11	0.766	3.223	2.457	1.96	1.117	0.351	19.81	0.826	0.06	1.86				67	44.525	48.208	3.17	44.93	0.405	22.46	44.583	0.058	3.086			75	42.729	45.921	3.192	2.504	43.302	0.573	20.83	42.815	0.086
	32	28.572	28.764	0.192				8.51		0.01				A12	0.734	2.607	1.873	1.506	0.978	0.244	17.87	0.764	0.03	1.431				68	44.385	48.353	3.3	44.88	0.495	21.05	44.457	0.072	3.191			77	43.899	46.795	2.896	2.476	44.306	0.407	20.24	43.978	0.079
	33	55.894	56.027	0.133				7.18		0.01				A13	0.768	4.7	3.932	2.891	1.54	0.772	20.65	0.847	0.079	2.759												biomassa total: 0.193				78	67.799	70.731	2.932	2.568	68.138	0.339	19.82	67.872	0.073
										bio total=0.374				A14	0.819	4.382	3.563	2.564	1.533	0.714	22.13	0.907	0.088	2.433												Biomassa >20mm: 0.193				74	49.487	52.07	2.583	2.296	49.764	0.277	18.38	49.543	0.056
										bio >20mm=0.150				A15	1.02	3.05	2.03	1.726	1.277	0.257	19.18	1.073	0.053	1.683																79	65.116	66.295	1.179	1.017	65.221	0.105	15.21	65.125	0.009
														A16	0.807	3.989	3.182	2.601	1.262	0.455	21.14	0.882	0.075	2.515				a10											2	73	42.297	43.343	1.046	0.92	42.506	0.209	14.43	42.313	0.016
A6												8		A17	1.122	2.932	1.81	1.597	1.276	0.154	17	1.147	0.025	1.56				46	44.575	47.795	2.375	45.311	0.736	20.61	44.64	0.065	2.278			80	101.334	101.897	0.563	0.45	101.398	0.064	12	101.345	0.011
	34	48.526	51.986	3.46	2.516	49.103	0.577	21.67	48.614	0.088	2.463					0.275	0.275	0.275			9.86		0.01					49	41.618	44.349	2.096	42.085	0.467	18.81	41.687	0.069	2.029			76	58.821	59.395	0.574	0.475	58.993	0.172	11.91	58.846	0.025
	35	43.461	43.733	0.272				9.3		0.01						0.135	0.135	0.135			7.69		0.01													biomassa total: 0.134				A8			0
	36	28.315	28.507	0.192				8.53		0.01						0.206	0.206	0.206			8.79		0.01													Biomassa >20mm: 0.065				81	104.311	108.4	4.089	3.48	104.834	0.523	21.35	104.4	0.089
	37	44.759	44.815	0.056				5.46		0.01						0.164	0.164	0.164			7.58		0.01																	82	102.779	105.383	2.604	2.088	103.208	0.429	20.5	102.835	0.056
	38	42.236	42.242	0.006				3.6		0.01						0.151	0.151	0.151			8.2		0.01					b1											3	83	104.478	106.77	2.292	1.858	104.811	0.333	17.61	104.52	0.042
	39	60.962	61.097	0.135				7.2		0.01						0.09	0.09	0.09			6.71		0.01					81	104.311	106.18	1.387	104.539	0.228	17.5	104.36	0.049	1.356			XI	60.552	61.483	0.931	0.815	60.625	0.073	13.02	60.559	0.007
	40	63.815	63.858	0.043				5.37		0.01						0.061	0.061	0.061			5.33		0.01					82	102.779	106.621	2.836	103.52	0.741	17.4	93.637	0.04	2.703						0
																	0																									0.044	0.044				5.21		0.01
	41	42.499	42.521	0.022				4.66		0.01						0.106	0.106	0.106			7.07		0.01					83	104.478	107.692	2.527	104.864	0.386	19.57	74.815	0.06	2.42			A9			0
																0.057	0.057	0.057			5.74		0.01													biomassa total: 0.149				66	41.648	47.049	5.401	3.995	42.96	1.312	24.98	41.799	0.151
																0.073	0.073	0.073			5.68		0.01													Biomassa >20mm: 0.0				68	44.385	49.686	5.301	3.844	45.598	1.213	23.5	44.514	0.129
A7												14				0.08	0.08	0.08			6.25		0.01					b2											8	67	44.525	49.403	4.878	3.59	45.617	1.092	22.55	44.645	0.12
	42	42.249	43.939	1.69	1.25	42.501	0.252	16.2	42.284	0.035	1.207						0						biomassa total: 0.582					16	16.95	0.197				7.85		0.01				72	39.894	44.489	4.595	3.486	40.876	0.982	22.33	39.95	0.056
	43	42.312	44.776	2.464	1.913	42.591	0.279	17.94	42.35	0.038	1.834						0						biomassa >20mm: 0.242					10	17.712	19.932	1.711	18.123	0.411	16.92	17.754	0.042	1.666			71	41.671	45.756	4.085	3.161	42.39	0.719	22.09	41.713	0.042
	44	43.334	47.822	4.488	3.111	44.356	1.022	23.25	43.444	0.11	2.989						0											11	21.906	22.62	0.542	21.999	0.093	12.64	21.926	0.02	0.519			65	51.7	56.607	4.907	3.766	52.486	0.786	21.82	51.808	0.108
	45	42.428	45.956	3.528	2.628	42.921	0.493	20.46	42.504	0.076	2.561		A7				0									7		15	16.476	18.347	1.49	16.755		16.88	16.507	0.031	1.405			69	41.512	44.427	2.915	2.179	42.137	0.625	19.4	41.545	0.033
	46	44.575	47.43	2.855	2.081	44.92	0.345	18.98	44.628	0.053	2.038			8	16.073	19.198	3.125	2.663	16.405	0.332	21.43	16.13	0.057	2.595				12	15.025	18.786	2.766	15.816	0.791	22.52	15.113	0.088	2.675			a 10			0
	47	42.958	45.328	2.37	1.757	43.319	0.361	18.56	42.879	0.079	1.678			9	9.316	12.994	3.678	2.941	9.843	0.527	22.78	9.406	0.09	2.838				13	18.501	24.933	4.778	19.782	1.281	24.32	18.663	0.162	4.688			1	9.704	12.313	2.609	2.168	10.133	0.429	21.1	9.761	0.057
	48	39.832	43.807	3.975	2.873	40.351	0.519	21.93	39.919	0.087	2.75			10	17.712	20.58	2.868	2.273	18.144	0.432	20.54	17.762	0.05	2.23				14	17.816	21.563	2.906	18.508	0.692	20.97	17.892	0.076	2.825			2	9.285	12.214	2.929	2.633	9.582	0.297	19.36	9.31	0.025
	49	41.618	44.57	2.952	2.065	42.067	0.449	20.05	41.683	0.065	2.005			11	21.906	25.184	3.278	2.836	22.274	0.368	21.45	21.982	0.076	2.795				9	9.316	14.802	4.148	10.428	1.112	23.6	9.437	0.121	4.039			3	9.471	11.798	2.327	1.932	9.845	0.374	18.86	9.517	0.046
	50	31.497	35.033	3.536	2.585	31.829	0.332	20.72	31.564	0.067	2.553					0.112	0.112	0.112			6.9		0.01													biomassa total: 0.55				B1			0
	51	29.702	31.564	1.862	1.345	29.999	0.297	17.72	29.746	0.044	1.271					0.119	0.119	0.119			6.87		0.01													Biomassa >20mm: 0.447				62	43.107	47.446	4.339	3.454	44	0.893	20.4	43.205	0.098
	52	25.266	27.2	1.934	1.495	25.562	0.296	16.31	25.312	0.046	1.44					0.064	0.064	0.064			5.59		0.01					b3											9	61	43.34	45.626	2.286	1.803	43.701	0.361	17.05	43.384	0.044
	53	25.836	28.34	2.504	1.948	26.14	0.304	17.24	25.89	0.054	1.901						0						biomassa total: 0.303							0.234				9.1		0.01				63	43.292	43.745	0.453	0.342	43.387	0.095	10.69	43.306	0.014
	54	28.834	32.313	3.479	2.545	29.299	0.465	20.52	28.914	0.08	2.444						0						biomassa >20mm:273							0.231				8.76		0.01						0.208	0.208				9.29		0.01
	55	29.255	29.532	0.277				9.03		0.01			A8				0									9				0.149				7.72		0.01						0.2	0.2				8.69		0.01
														52	25.266	29.47	4.204	3.198	25.562	0.296	21.58	25.333	0.067	3.075						0.075				6.12		0.01				B2			0
										bio total=0.844				22	26.702	29.853	3.151	2.886	26.925	0.223	22.9	26.756	0.054	2.851						0.045				5.42		0.01				50	31.497	35.04	3.543	2.806	32.089	0.592	21.06	31.598	0.101
										bio >20mm=0.485				27	43.262	48.131	4.869	3.438	44.439	1.177	25.05	43.335	0.073	3.334				65	51.7	52.587	0.741	51.794	0.094	13.13	51.709	0.009	0.718			51	29.702	32.002	2.3	1.861	30.098	0.396	17.71	29.75	0.048
														51	29.702	31.188	1.486	1.161	29.928	0.226	15.08	29.734	0.032	1.097				54	28.834	30.351	1.358	28.971	0.137	15.53	28.865	0.031	1.312			B3			0
														59	27.299	30.905	3.606	2.712	27.846	0.547	21.5	27.379	0.08	2.682				59	27.299	27.8	0.409	27.365	0.066	10.58	27.308	0.009	0.393			11	21.906	22.339	0.433	0.341	21.966	0.06	16.14	21.916	0.01
A8												3		56	20.103	22.871	2.768	1.914	20.453	0.35	20.53	20.068	0.035	1.859				53	25.836	26.193	0.282	25.902	0.066	10.42	25.849	0.013	0.255			15	16.476	17.514	1.038	0.823	16.629	0.153	13.19	16.484	0.008
	24	25.063	30.75	5.687	3.628	26.305	1.242	23.81	25.19	0.127	3.531			50	31.497	35.527	4.03	2.964	32.249	0.752	22.6	31.566	0.069	2.892												biomassa total:0.112				13	18.501	19.132	0.631	0.488	18.59	0.089	11.18	18.518	0.017
	31	31.403	31.424	0.021				3.67		0.01				58	30.493	33.207	2.714	2.099	40.967	10.474	19.83	30.55	0.057	2.008												Biomassa >20mm: 0				12	15.025	15.364	0.339	0.25	15.082	0.057	10.21	15.034	0.009
	32	28.572	28.59	0.018				3.63		0.01				32	28.572	32.096	3.524	2.544	29.115	0.543	20.07	28.643	0.071	24.321																14	17.816	18.161	0.345	0.258	17.871	0.055	10	17.83	0.014
										bio total=0.147							0						biomassa total: 0.303					b4											1			0.292	0.292				9.67		0.01
										bio >20mm=0							0						biomassa >20mm:273					75	42.729	45.417	2.197	43.023	0.294	18.8	42.787	0.058	2.083					0.218	0.218				9.33		0.01
																	0											b5											6			0.217	0.217				8.71		0.01
A9												13	A9				0									3				0.191				7.83		0.01						0.162	0.162				7.35		0.01
	33	55.894	61.298	5.404	3.779	57.018	1.124	24.34	55.986	0.092	3.649			47	#REF!	47.149	#REF!	3.249	43.658	#REF!	23.52	43.056	0.105	3.099						0.279				9.23		0.01						0.04	0.04				4.71		0.01
	35	43.461	47.901	4.44	3.242	44.221	0.76	23.15	43.562	0.101	3.063				0.262	0.262	0				9.25		0.01					70	53.569	54.347	0.593	53.611	0.042	12.64	53.573	0.004	0.58					0.03	0.03				4.25		0.01
	36	28.315	31.958	3.643	2.71	29.152	0.837	27.09	28.411	0.096	2.595				0.312	0.312	0				9.17		0.01					71	41.671	44.51	2.361	42.033	0.362	19.56	41.688	0.017	2.288					0.022	0.022				3.79		0.01
	37	44.759	48.504	3.745	2.744	45.44	0.681	21.79	44.843	0.084	2.655						0						biomassa total: 0.125					72	39.894	43.372	2.965	40.248	0.354	20.89	39.898	0.004	2.803			B4			0
	38	42.236	46.695	4.459	3.347	43.047	0.811	21.1	42.306	0.07	3.231						0						biomassa >20mm:0.105					69	41.512	44.937	2.821	41.938	0.426	21.38	41.567	0.055	2.759			54	28.834	29.332	0.498	0.404	28.902	0.068	11.17	28.855	0.021
	39	60.962	65.446	4.484	3.414	61.893	0.931	22.42	61.068	0.106	3.262		A10				0									10									biomassa total:0.1					B6			0
	40	63.815	67.606	3.791	2.786	64.401	0.586	21.61	63.9	0.085	2.723			38	42.236	47.14	4.904	3.583	43.402	1.166	23.68	42.345	0.109	3.453											Biomassa >20mm: 0.059					37	44.759	45.543	0.784	0.632	44.869	0.11	12.23	44.778	0.019
	41	42.499	45.124	2.625	1.989	42.94	0.441	18.65	42.553	0.054	1.91			40	63.815	67.077	3.262	2.497	64.487	0.672	19.22	63.891	0.076	2.347				b6											4	38	42.236	43.506	1.27	1.076	42.375	0.139	14.2	42.251	0.015
	55	29.255	32.413	3.158	2.576	29.695	0.44	18.88	29.31	0.055	2.479			43	42.312	44.589	2.277	1.724	42.919	0.607	17.49	42.373	0.061	1.646				x	43.827	44.666	0.751	43.876	0.049	13.05	43.827	0.01	0.738			39	60.962	63.266	2.304	1.949	61.277	0.315	18.43	60.012	0.064
	56	20.103	23.197	3.094	2.533	20.541	0.438	19.73	20.174	0.071	2.443			49	41.618	45.133	3.515	2.774	42.292	0.674	21.38	41.705	0.087	2.678				xi	60.552	61.139	0.514	60.611	0.059	12.25	60.561	0.009	0.499			40	63.815	66.607	2.792	2.32	64.232	0.417	19.75	63.872	0.057
														66	41.648	44.557	2.909	2.177	42.309	0.661	19.73	41.703	0.055	2.074																46	44.575	47.153	2.578	2.164	44.937	0.362	18.95	44.639	0.064
														73	42.297	46.785	4.488	3.24	43.402	1.105	23.73	42.414	0.117	3.085																47	42.958	44.618	1.66	1.376	43.21	0.252	16	42.986	0.028
														74	49.487	52.722	3.235	2.557	50.11	0.623	19.15	49.562	0.075	2.435																52	25.266	29.041	3.775	3.132	25.778	0.512	19.37	25.35	0.084
	57	28.246	31.132	2.886	2.183	28.58	0.334	18.7	28.289	0.043	2.123			77	43.899	47.55	3.651	2.604	44.803	0.904	21.89	44.002	0.103	2.492				66	41.648	42.219	0.491	41.73	0.082	11.69	41.636	0.01	0.481			53	25.836	26.34	0.504	0.401	25.892	0.056	11.05	25.846	0.01
	58	30.493	32.9	2.407	1.906	30.889	0.396	16.56	30.125	0.368	1.843			78	67.799	71.95	4.151	2.967	68.885	1.086	22.4	67.905	0.106	2.828						0.146				7.71		0.01				55	29.255	29.875	0.62	0.518	29.308	0.053	12.05	29.262	0.007
	59	27.299	27.691	0.392	0.3	27.338	0.039	10.28	27.314	0.015	0.285			79	65.116	69.406	4.29	3.891	65.469	0.353	24.4	65.187	0.071	3.842												biomassa total:0.039				60	43.459	43.923	0.464	0.34	43.5	0.041	10.33	43.459	0.01
										BT=1.240							0						biomassa total: 0.860													Biomassa >20mm: 0				49	41.618	41.989	0.371	0.274	41.67	0.052	10.24	41.631	0.013
										bio >20mm=0.634							0						biomassa >20mm:0.105					b7											8			0.019	0.019				3.27		0.01
																	0											25	51.794	55.79	3.048	52.475	0.681	21.92	51.896	0.102	2.969			B7			0
A10												4					0											22	26.702	29.557	2.465	26.988	0.286	19.84	26.778	0.076	2.419			78	67.799	70.841	3.042	2.473	68.336	0.537	22.54	67.87	0.071
	60	43.459	45.378	1.919	1.455	43.813	0.354	17.16	43.502	0.043	1.391						0											26	26.902	29.163	1.614	27.343	0.441	18.72	26.965	0.063	1.544			79	65.116	68.542	3.426	2.624	65.768	0.652	19.61	65.181	0.065
	61	43.34	43.897	0.557	0.099	43.391	0.051	11.31	43.353	0.013	0.409						0											27	43.262	46.012	2.078	43.648	0.386	18.83	43.315	0.053	2.019			80	101.334	103.165	1.831	1.624	101.539	0.205	16.67	101.366	0.032
	62	43.107	43.162	0.055				4.85		0.01							0											28	43.271	44.37	0.863	43.426	0.155	14.34	43.303	0.032	0.826			81	104.311	106.32	2.009	1.572	104.662	0.351	16.55	104.338	0.027
	63	43.292	43.315	0.023				4.1		0.01							0											30	43.393	43.825	0.333	43.441	0.048	10.12	43.403	0.01	0.318			82	102.779	103.993	1.214	0.951	105.95	3.171	14.41	102.791	0.012
										BT=0.076			B1				0									20		50	31.497	31.845	0.302	31.527	0.03	10.32	31.508	0.011	0.282			83	104.478	104.99	0.512	0.422	104.577	0.099	11.11	104.48	0.002
										bio >20mm=0				28	43.271	45.885	2.614	2.292	43.573	0.302	19.62	43.341	0.07	2.185				51	29.702	30.121	0.335	29.718	0.016	10.35	29.705	0.003	0.314			40	63.815	64.537	0.722	0.54	63.968	0.153	11.89	63.832	0.017
														23	28.752	31.485	2.733	2.406	29.064	0.312	21.14	28.819	0.067	2.29												biomassa total:0.350				3	9.471	11.112	1.641	1.288	9.758	0.287	15.27	9.506	0.035
B1												17		51	29.702	31.49	1.788	1.561	29.899	0.197	17.16	29.755	0.053	1.508												Biomassa >20mm: 0.12				B8			0
	1	9.704	12.106	2.402	1.857	10.14	0.436	18.15	9.768	0.064	1.794			59	27.299	31.298	3.999	3.427	27.837	0.538	23.35	27.38	0.081	3.314				b8											8	1	9.704	12.772	3.068	2.552	10.14	0.436	19.71	9.762	0.058
	2	9.285	12.271	2.986	2.399	9.765	0.48	19.2	9.369	0.084	2.313			29	33.418	36.724	3.306	2.566	34.061	0.643	21.05	33.501	0.083	2.403				68	44.385	44.977	0.521	44.417	0.032	11.89	44.397	0.012	0.511			4	9.733	10.604	0.871	0.763	9.831	0.098	13.77	9.753	0.02
	3	9.471	11.956	2.485	1.868	9.962	0.491	18.79	9.541	0.07	1.793			31	31.403	35.501	4.098	3.608	31.884	0.481	23.31	31.49	0.087	3.47				69	41.512	42.67	1.045	41.557	0.045	14.86	41.501	0.01	1.009			7	9.075	11.537	2.462	2.033	9.492	0.417	19.37	9.139	0.064
	4	9.733	12.277	2.544	1.952	10.226	0.493	17.93	9.806	0.073	1.869			52	25.266	28.188	2.922	2.511	25.653	0.387	22.18	25.34	0.074	2.459				70	53.569	54.486	0.755	53.633	0.064	13.38	53.545	0.02	0.728			2	9.285	10.026	0.741	0.608	9.382	0.097	12.62	9.288	0.003
	5	9.048	11.346	2.298	1.645	9.533	0.485	16.94	9.119	0.071	1.569			24	25.063	27.684	2.621	2.117	25.505	0.442	19.09	25.136	0.073	2.028				71	41.671	42.346	0.582	41.676	0.005	12.99	41.626	0.01	0.55					0.133	0.133				7.75		0.01
	6	9.776	11.6	1.824	1.377	10.11	0.334	19.39	9.84	0.064	1.33			32	#REF!	31.161	#REF!	2.293	28.857	#REF!	19.78	28.641	#REF!	2.239				73	42.297	43.64	1.175	42.42	0.123	15.16	42.307	0.01	1.087			B9			0
	7	9.075	11.523	2.448	1.861	9.581	0.506	18.6	9.151	0.076	1.764			22	26.702	29.226	2.524	2.264	26.956	0.254	22.16	26.771	0.069	2.204						0.069				5.65		0.01				56	20.103	20.364	0.261	0.187	20.148	0.045	9.06	20.11	0.007
	8	16.073	17.508	1.435	1.133	16.294	0.221	15.33	16.103	0.03	1.079			55	29.255	31.89	2.635	2.112	29.683	0.428	18.7	29.305	0.05	1.967						0.16				7.82		0.01				B10			0
	9	9.316	9.857	0.541	0.411	9.393	0.077	11.68	9.333	0.017	0.385			63	43.292	44.4	1.108	0.941	43.423	0.131	15.31	43.331	0.039	0.882				72	39.894	43.448	2.98	40.278	0.384	21.44	39.921	0.027	2.9			8	#REF!	16.534	#REF!	0.372	16.124	#REF!	10.52	16.097	0.01
	10	17.712	17.742	0.03				4.6		0.01				60	43.459	44.522	1.063	0.862	43.6	0.141	13.95	43.477	0.018	0.818												biomassa total:0.109				C1			0
	11	21.906	22.064	0.158				8.09		0.01				61	43.34	44.279	0.939	0.797	43.445	0.105	13.23	43.366	0.026	0.741												Biomassa >20mm: 0.027				18	17.694	19.303	1.609	1.311	17.851	0.157	15.36	17.709	0.015
	12	15.025	15.331	0.306				9.58		0.01				69	41.512	41.961	0.449	0.449	41.529	0.017	10.99	41.489	0.02	0.387																C2			0
	13	18.501	18.582	0.081				5.57		0.01				67	44.525	44.954	0.429	0.429	44.574	0.049	10.59	44.53	0.005	0.315				b9											12	74	49.487	52.779	3.292	2.746	49.968	0.481	21.35	49.562	0.075
	14	17.816	18.059	0.243				8.93		0.01						0.33	0.33	0.33			9.62		0.01					52	25.266	29.56	3.481	25.948	0.682	25.54	25.401	0.135	3.398			75	42.729	46.551	3.822	2.967	43.503	0.774	24.42	42.842	0.113
	15	16.476	17.052	0.576	0.449	16.53	0.054	11.53	16.477	0.01	0.433					0.1	0.1	0.1			6.49		0.01					54	28.834	32.644	2.911	29.546	0.712	21.2	28.923	0.089	2.828			16	16.95	22.404	5.454	4.078	18.187	1.237	23.78	17.07	0.12
	16	16.95	17.31	0.36	0.272	16.992	0.042	10.23	16.952	0.01	0.25					0.33	0.33	0.33			9.95		0.01					55	29.255	30.762	1.28	29.382	0.127	14.75	29.265	0.01	1.229			52	25.266	26.861	1.595	1.275	25.545	0.279	15.13	25.298	0.032
	17	18.908	19.154	0.246				9.04		0.01							0						biomassa total: 1.061					57	28.246	29.174	0.74	28.331	0.085	13.66	28.253	0.007	0.706			53	25.836	26.282	0.446	0.345	25.923	0.087	10.75	25.843	0.007
										BT=0.629							0						biomassa >20mm:0.461					23	28.752	29.543	0.613	28.836	0.084	12.92	28.776	0.024				90	54.585	55.185	0.6	0.492	54.658	0.073	12	54.578	0.01
										bio >20mm=0							0											53	25.836	29.435	2.91	26.317	0.481	19.78	25.92	0.084	2.801			91	64.998	65.546	0.548	0.431	65.078	0.08	11.34	65	0.002
													B2				0									22		58	30.493	31.378	0.665	30.587	0.094	13.41	30.512	0.019	0.657			92	66.23	67.302	1.072	0.792	66.494	0.264	13.49	66.337	0.107
B2												24		A19	0.755	1.623	0.868	0.694	0.853	0.098	13.09	0.769	0.014	0.657				24	25.063	25.83	0.614	25.13	0.067	12.15	21.09	0.01	0.597			C3			0
	12	15.025	17.754	2.729	15.498	15.408	0.383	19.24	15.091	0.066	2.037			A18	0.765	1.322	0.557	0.5	0.813	0.048	12.11	0.776	0.011	0.492						0.347				9.69		0.01				26	26.902	31.672	4.77	4.008	27.555	0.653	22.95	27.019	0.117
	13	18.501	21.911	3.41	19.331	19.331	0.83	20.21	18.595	0.094	2.464			41	42.499	43.241	0.742	0.611	42.589	0.09	12.69	42.518	0.019	0.601						0.123				7.15		0.01				25	51.794	55.758	3.964	3.322	52.311	0.517	22.33	51.899	0.105
	14	17.816	20.83	3.014	18.427	18.427	0.611	19.39	17.892	0.076	2.152					0.361	0.361	0.361			9.98		0.01							0.258				9.17		0.01				27	43.262	47.083	3.821	3.335	43.685	0.423	19.97	43.345	0.083
	17	18.908	21.151	2.243	1.742	19.342	0.434	17.5	18.966	0.058	1.689			42	42.249	42.711	0.462	0.36	42.309	0.06	10.92	42.265	0.016	0.349						0.209				8.75		0.01				28	43.271	46.095	2.824	2.391	43.601	0.33	19.14	43.343	0.072
	18	17.694	21.12	3.426	2.494	18.322	0.628	21.55	17.776	0.082	2.4			70	53.569	54.303	0.734	0.609	53.654	0.085	12.73	53.579	0.01	0.576												biomassa total:0.418				30	43.393	45.351	1.958	1.769	43.581	0.188	17.02	43.438	0.045
	19	20.108	22.514	2.406	1.836	20.52	0.412	18.68	20.17	0.062	1.743			47	42.958	43.355	0.397	0.349	43.004	0.046	10.81	42.97	0.012	0.331												Biomassa >20mm: 0.224				31	31.403	33.049	1.646	1.367	31.588	0.185	16.14	31.44	0.037
	21	15.265	18.702	3.437	2.73	15.872	0.607	22.67	15.367	0.102	2.62					0.276	0.276	0.276			9.27		0.01					b10											3	23	28.752	30.475	1.723	1.251	28.897	0.145	15.72	28.789	0.037
	22	26.702	31.616	4.914	3.587	27.856	1.154	23.74	26.861	0.159	3.491					0.341	0.341	0.341			9.75		0.01							0.249				8.47		0.01				29	33.418	35.014	1.596	1.286	33.558	0.14	15.38	33.446	0.028
	56	20.103	23.12	3.017	2.401	20.636	0.533	19.34	20.189	0.086	2.303					0.15	0.15	0.15			7.45		0.01							0.167				7.9		0.01				22	26.702	28.144	1.442	1.135	26.893	0.191	14.69	26.735	0.033
	51	29.702	32.867	3.165	2.291	30.464	0.762	20.65	29.802	0.1	2.218					0.113	0.113	0.113			6.57		0.01					77	43.899	46.598	2.348	44.122	0.223	17.86	43.931	0.032	2.272			35	43.461	44.389	0.928	0.72	43.596	0.135	13.02	43.487	0.026
	60	43.459	46.767	3.308	2.351	44.175	0.716	20.44	43.563	0.104	2.272			75	42.729	45.196	2.467	1.914	43.182	0.453	17.82	42.791	0.062	1.862																32	28.572	29.148	0.576	0.439	28.647	0.075	11.69	28.585	0.013
	57	28.246	30.741	2.495	1.88	28.687	0.441	18.18	28.31	0.064	1.821			45	42.428	45.818	3.39	2.768	42.965	0.537	20.94	42.526	0.098	2.645																34	48.526	48.905	0.379	0.309	48.562	0.036	10.02	48.54	0.014
	27	43.262	43.951	0.689	0.542	43.376	0.114	12.26	43.281	0.019	0.521			57	28.246	31.853	3.607	3.088	28.715	0.469	21.01	28.336	0.09	3.003											biomassa total:0.032								0.195				8.43		0.01
	55	29.255	29.804	0.549	0.406	29.348	0.093	11.74	29.268	0.013	0.393			76	58.821	61.837	3.016	2.632	59.159	0.338	19.68	58.883	0.062	2.565											Biomassa >20mm: 0								0.066				5.82		0.01
	58	30.493	30.934	0.441	0.362	30.545	0.052	11.15	30.509	0.016	0.363			35	43.461	46.953	3.492	2.911	43.954	0.493	21.27	43.539	0.078	2.834															1				0.315				9.55		0.01
	61	43.34	43.913	0.573	0.477	43.407	0.067	11.4	43.358	0.018	0.462			72	39.894	41.625	1.731	1.614	39.995	0.101	16.36	39.87	0.02	1.567				73	42.297	42.637	0.289	42.307	0.01	10.37	42.287	0.01	0.258						0
	24	25.063	25.809	0.746	0.586	25.161	0.098	12.85	25.08	0.017	0.553			36	28.315	31.746	3.431	2.866	28.834	0.519	21.75	28.421	0.106	2.808															1	C4			0
	52	25.266	25.725	0.459	0.34	25.311	0.045	10.93	25.279	0.013	0.332			74	49.487	52.174	2.687	2.392	49.728	0.241	19.29	49.538	0.051	2.304				74	49.487	53.168	2.671	50.322	0.835	22.15	49.581	0.094	2.608					0.196	0.196				8.44		0.01
	26	26.902	27.173	0.271				9.44		0.01				39	60.962	64.091	3.129	2.462	61.512	0.55	20.23	61.039	0.077	2.399															5			0.265	0.265				9.12		0.01
	59	27.299	27.71	0.411	0.303	27.342	0.043	10.75	27.31	0.011	0.301			68	44.385	45.658	1.273	1.055	44.561	0.176	14.66	44.405	0.02	1.005				59	27.299	29.808	2.096	27.609	0.31	18.66	27.387	0.088	2.047			46	44.575	0.318	-44.257				9.13		0.01
	20	51.479	51.927	0.448	0.339	51.543	0.064	10.79	51.5	0.021	0.334			71	41.671	44.12	2.449	2.047	42.031	0.36	19.09	41.694	0.023	1.997				60	43.459	45.697	1.748	43.802	0.343	18.25	43.515	0.056	1.68			43	42.312	45.493	3.181	2.563	42.753	0.441	18.09	42.372	0.06
			0.036	0.036			0	4.62		0.01							0						biomassa total: 0.819					63	43.292	45.566	1.81	43.595	0.303	18.65	43.323	0.031	1.767			42	42.249	45.918	3.669	2.802	42.941	0.692	19.72	42.344	0.095
			0.02	0.02			0	3.78		0.01							0						biomassa >20mm:0.450				c1	61	43.34	47.147	2.919	44.001	0.661	21.57	43.443	0.103	2.818			41	42.499	45.853	3.354	2.499	43.065	0.566	20.32	42.58	0.081
			0.098	0.098			0	6.48		0.01							0											62	43.107	48.402	4.43	43.825	0.718	25.16	43.273	0.166	4.359			44	43.334	47.292	3.958	3.067	43.856	0.522	21.27	43.414	0.08
													B3				0									6	c2									biomassa total:0.444				C5			0
										BT=				45	42.428	44.873	2.445	2.139	42.687	0.259	21.55	42.483	0.055	2.066												Biomassa >20mm: 0.269				15	16.476	21.946	5.47	4.524	17.423	0.947	24.86	16.614	0.138
										bio >20mm=0				76	58.821	61.024	2.203	1.962	59.018	0.197	18.02	58.869	0.048	1.898			c3													16	16.95	17.393	0.443	0.375	17.016	0.066	10.7	16.97	0.02
														70	53.569	53.901	0.332	0.295	53.608	0.039	9.78	53.574	0.005	0.282															1	17	18.908	19.404	0.496	0.405	18.997	0.089	11.07	18.93	0.022
														68	44.385	47.287	2.902	2.351	44.748	0.363	19.4	44.409	0.024	2.302						0.169				7.77		0.01				C6			0
														37	44.759	48.15	3.391	2.952	45.102	0.343	20.83	44.855	0.096	2.853															7				0						0
														42	42.249	46.143	3.894	3.017	42.995	0.746	22.47	42.086	0.163	2.962				39	60.962	63.835	2.189	61.463	0.501	19.97	61.025	0.063	2.077			C7			0
																	0						biomassa total: 0.391					40	63.815	65.72	1.639	64.023	0.208	17.92	63.857	0.042	1.597			76	58.821	64.768	5.947	4.59	60.01	1.189	25.68	59.016	0.195
																	0						biomassa >20mm:0.310					46	44.575	46.43	1.645	44.745	0.17	16.67	44.606	0.031	1.589			68	44.385	49.653	5.268	4.872	45.358	0.973	24.66	44.557	0.172
																	0											42	42.249	44.81	2.001	42.681	0.432	19.6	42.328	0.079	1.918			77	43.899	49.266	5.367	4.229	44.852	0.953	24.47	44.07	0.171
													B4				0									9		43	42.312	45.554	2.602	42.836	0.524	21.4	42.409	0.097	2.493			71	41.671	46.282	4.611	3.949	42.261	0.59	23.56	41.754	0.083
														25	51.794	55.461	3.667	3.03	52.334	0.54	21.79	51.876	0.082	2.915			c4	44	43.334	48.226	3.81	44.273	0.939	24.49	43.487	0.153	3.656			73	42.297	47.188	4.891	3.979	43.143	0.846	23.06	42.44	0.143
														50	31.497	33.786	2.289	2.006	31.76	0.263	18.62	31.557	0.06	1.948				41	42.499	47.886	4.385	43.319	0.82	23.71	42.639	0.14	4.29			67	44.525	47.243	2.718	2.157	45.007	0.482	19.62	44.586	0.061
B3												17		62	43.107	45.472	2.365	2.014	43.38	0.273	20.72	43.171	0.064	1.953			c5									biomassa total:0.605				57	28.246	30.044	1.798	1.528	28.481	0.235	16.75	28.286	0.04
	23	28.752	31.321	2.569	2.163	29.115	0.363	18.33	28.819	0.067	2.112			60	43.459	46.204	2.745	2.461	43.661	0.202	19.24	43.506	0.047	2.4												Biomassa >20mm: 0.390				XI	60.552	62.136	1.584	1.383	60.83	0.278	15.83	60.579	0.027
	25	51.794	55.428	3.634	2.688	52.592	0.798	20.43	51.94	0.146	2.59					0.082	0.082	0.082			6.79		0.01																	5	9.048	9.922	0.874	0.759	9.155	0.107	13	9.072	0.024
	28	43.271	46.212	2.941	2.412	43.741	0.47	20.49	43.389	0.118	2.319					0.043	0.043	0.043			5.63		0.01																7	70	53.569	54.127	0.558	0.48	53.629	0.06	11.25	53.576	0.007
	29	33.418	34.21	0.792	0.678	33.489	0.071	13	33.434	0.016	0.655					0.068	0.068	0.068			6.21		0.01					40	63.815	67.644	2.872	64.523	0.708	20.86	63.926	0.111	2.806			c8			0
	30	43.393	43.829	0.436	0.344	43.447	0.054	12.41	43.409	0.016	0.326					0.079	0.079	0.079			6.24		0.01					44	43.334	48.119	3.732	44.187	0.853	21.23	43.479	0.145	3.609			24	25.063	31.553	6.49	4.817	26.562	1.499	24.68	25.226	0.163
	33	55.894	56.373	0.479	0.381	52.901	-2.993	13.18	55.912	0.018	0.348						0						biomassa total: 0.293					45	42.428	46.549	3.006	43.302	0.874	21.83	42.534	0.106	2.939			26	26.902	30.288	3.386	2.783	27.456	0.554	21.77	26.984	0.082
																	0						biomassa >20mm: 0.150							0.191				7.86		0.01				25	51.794	56.105	4.311	3.239	52.686	0.892	20.83	51.917	0.123
																	0											41	42.499	45.191	2.038	43.015	0.516	19.84	42.578	0.079	1.937			30	43.393	46.552	3.159	2.728	43.747	0.354	20.16	43.454	0.061
	34	48.526	49.182	0.656	0.549	48.6	0.074	10.47	48.541	0.015	0.512		B5				0									5		42	42.249	43.682	1.113	42.484	0.235	15.48	42.279	0.03	1.064			31	31.403	34.476	3.073	2.426	31.912	0.509	19.96	31.475	0.072
	35	43.461	43.855	0.394	0.317	43.529	0.068	10.25	42.663	0.798	0.292			36	28.315	30.172	1.857	1.47	28.538	0.223	16.73	28.357	0.042	1.452				43	42.312	44.275	1.552	42.59	0.278	16.9	42.353	0.041	1.474			23	28.752	31.873	3.121	2.461	29.356	0.604	19.79	28.817	0.065
	37	44.759	45.118	0.359	0.27	44.816	0.057	10.61	44.772	0.013	0.265			41	42.499	44.748	2.249	1.813	42.802	0.303	15.86	42.554	0.055	1.756			c6									biomassa total:0.522				35	#REF!	46.501	#REF!	2.343	46.501	#REF!	19.57	43.553	#REF!
	38	42.236	42.606	0.37	0.326	42.271	0.035	10.13	42.232	0.01	0.317			75	42.729	46.625	3.896	2.951	43.38	0.651	20.85	42.819	0.09	2.835												Biomassa >20mm: 0.362				29	33.418	35.918	2.5	1.966	33.822	0.404	18.72	33.467	0.049
			0.29	0.29			0	9.72		0.01				44	43.334	44.281	0.947	0.727	43.488	0.154	13.3	43.363	0.029	0.697																22	26.702	28.572	1.87	1.465	27.093	0.391	16.68	26.754	0.052
			0.065	0.065			0	5.67		0.01							0	0.112			6.9		0.01																	C9			0
			0.045	0.045			0	5.14		0.01							0						biomassa total: 0.226																9	20	51.479	52.382	0.903	0.711	51.634	0.155	13.16	51.517	0.038
			0.035	0.035			0	3.44		0.01							0						biomassa >20mm: 0.090							0.098				6.17		0.01				21	15.265	18.837	3.572	3.045	15.669	0.404	21.82	15.35	0.085
			0.01	0.01			0	4.39		0.01			B6				0									5				0.192				8.55		0.01				C10			0
			0.039	0.039			0	4.66		0.01				55	29.255	30.289	1.034	0.905	29.331	0.076	14.12	29.26	0.005	0.878						0.367	0.367			10.35		0.01				8	16.073	21.33	5.257	4.379	16.835	0.762	24.9	16.199	0.126
			0.037	0.037			0	4.53		0.01				25	51.794	54.28	2.486	2.147	52.048	0.254	20.34	51.862	0.068	2.103				36	28.315	30.788	2.019	28.652	0.337	18.11	28.358	0.043	1.947			10	17.712	22.502	4.79	3.616	18.619	0.907	23.79	17.837	0.125
										biomassa total: 1.287				23	28.752	29.315	0.563	0.486	28.795	0.043	11.61	28.762	0.01	0.458				37	44.759	47.832	2.52	45.273	0.514	19.73	44.835	0.076	2.433			11	21.906	26.324	4.418	3.5	22.64	0.734	23.54	22.029	0.123
										biomassa >20mm: 0.264				53	25.836	26.714	0.878	0.723	25.905	0.069	12.44	25.841	0.005	0.704				38	42.236	45.12	2.305	42.741	0.505	18.96	42.287	0.051	2.188			5	9.048	13.665	4.617	3.498	9.699	0.651	22.81	9.145	0.097
														12	15.025	15.702	0.677	0.574	15.083	0.058	12.36	15.038	0.013	0.182				77	43.899	45.936	1.643	44.184	0.285	16.82	43.93	0.031	1.572			4	9.733	12.822	3.089	2.601	10.216	0.483	22	9.844	0.111
B4												8					0						biomassa total: 0.101				c7	45	42.428	46.009	2.937	42.991	0.563	19.86	42.515	0.087	2.813			7	9.075	13.242	4.167	3.467	9.681	0.606	21.39	9.175	0.1
	10	17.712	21.315	3.603	2.681	18.48	0.768	20.1	17.816	0.104	2.599						0						biomassa >20mm: 0.068					75	42.729	46.294	2.832	43.418	0.689	22.38	42.837	0.108	2.697			9	9.316	12.258	2.942	2.463	9.721	0.405	19.66	9.398	0.082
	11	21.906	25.024	3.118	2.354	22.474	0.568	20.77	21.986	0.08	2.28						0																			biomassa total:0.426				13	15.025	19.202	4.177	0.571	18.619	3.594	12.6	18.523	0.01
	54	28.834	30.704	1.87	1.418	29.198	0.364	17.09	28.891	0.057	1.381		B7				0									9										Biomassa >20mm: 0.108				14	18.501	0.106	-18.395				6.69		0.01
	53	25.836	26.234	0.398	0.344	25.951	0.115	10.58	25.851	0.015	0.328					0.318	0.318				9.91		0.01																				0
																0.112	0.112				6.85		0.01																14				0
														34	48.526	49.198	0.672	0.621	48.581	0.055	13.01	48.549	0.023	0.614				18	17.694	22.477	3.77	18.541	0.847	21.64	17.808	0.114	3.319						0
														35	43.461	44.36	0.899	0.712	43.584	0.123	13.27	43.487	0.026	0.681				22	26.702	31.523	3.672	27.738	1.036	23.64	26.85	0.148	3.573						0
	30		0.019	0.019				3.44		0.01				36	28.315	29.198	0.883	0.691	28.435	0.12	13.78	28.334	0.019	0.667				26	26.902	30.45	2.863	27.483	0.581	20.98	26.995	0.093	2.765						0
	28		0.039	0.039				4.58		0.01				37	44.759	45.518	0.759	0.584	44.863	0.104	12.22	44.786	0.027	0.574				27	43.262	47.126	3.02	43.497	0.235	22.27	43.363	0.101	2.898						0
	25		0.017	0.017				3.92		0.01				41	42.499	43.159	0.66	0.62	42.529	0.03	13.24	42.509	0.01	0.605				28	43.271	46.669	2.606	43.972	0.701	21.03	43.376	0.105	2.534						0
			0.01	0.01				3.17		0.01				28	43.271	45.463	2.192	1.923	43.518	0.247	18.98	43.345	0.074	1.884				29	33.418	35.304	1.533	33.687	0.269	17	33.464	0.046	1.466						0
										biomassa total: 0.296				60	43.459	46.509	3.05	2.717	43.74	0.281	20.56	43.547	0.088	2.691				30	43.393	44.496	0.879	43.547	0.154	14.77	43.425	0.032	0.85						0
										biomassa >20mm: 0.184							0						biomassa total: 0.287				c8	31	31.403	33.146	1.481	31.581	0.178	16.9	31.435	0.032	1.442						0
																	0						biomassa >20mm: 0.088					32	28.572	30.104	1.301	28.736	0.164	15.45	28.597	0.025	1.276						0
B5												6					0											34	48.526	50.162	1.407	48.683	0.157	16.65	48.559	0.033	1.376						0
	65	51.7	56.438	4.738	3.47	52.836	1.136	24.03	51.838	0.138	3.344		B8				0									8		35	43.461	44.274	0.645	43.56	0.099	13	43.487	0.026	0.631						0
	66	41.648	42.39	0.742	0.59	41.78	0.132	13.23	41.664	0.016	0.566			80	101.334	102.088	0.754	0.634	101.412	0.078	12.41	101.339	0.005	0.597				36		0.244				9.4		0.01							0
			0.091	0.091				6.28		0.01				81	104.311	105.283	0.972	0.819	104.436	0.125	13.54	104.319	0.008	0.767						0.059				5.7		0.01							0
			0.139	0.139				7.99		0.01				82	102.779	103.497	0.718	0.587	102.848	0.069	12.49	102.787	0.008	0.554												biomassa total:0.775							0
			0.229	0.229				8.42		0.01				83	104.478	104.913	0.435	0.39	104.511	0.033	10.69	104.471	0.01	0.37												Biomassa >20mm: 0.561							0
			0.152	0.152				7.67		0.01							0	0.284			9.53		0.01																2				0
										biomassa total:0.194							0	0.142			7.38		0.01					79	65.116	66.377	0.981	65.278	0.162	14.55	65.148	0.032	0.95						0
										biomassa >20mm: 0.138							0	0.101			6.46		0.01					80	101.334	104.159	2.304	101.699	0.365	19.57	101.406	0.072	2.257						0
																	0	0.03			4.33		0.01													biomassa total:0.104							0
B6												4					0						biomassa total: 0.071																				0
	39	60.962	64.236	3.274	2.325	61.632	0.67	20.44	61.058	0.096	2.247						0																						9				0
	40	63.815	67.461	3.646	2.792	64.544	0.729	20.99	63.912	0.097	2.71		B9				0									36		29	33.418	39.065	4.182	34.637	1.219	25.22	33.552	0.134	4.019						0
	41	42.499	45.456	2.957	2.148	43.057	0.558	19.29	42.581	0.082	2.058			65	51.7	54.141	2.441	1.845	52.073	0.373	17.81	51.76	0.06	1.792				38	42.236	47.011	3.469	43.298	1.062	23.6	42.338	0.102	3.329						0
	42	42.249	43.342	1.093	0.913	42.515	0.266	14.05	42.28	0.031	0.876			26	26.902	30.209	3.307	2.525	27.413	0.511	20.97	26.999	0.097	2.464			c9	37	44.759	49.345	3.386	45.786	1.027	23.37	44.86	0.101	3.224						0
										biomassa total: 0.306				29	33.418	36.851	3.433	2.618	33.979	0.561	20.85	33.521	0.103	2.549				39	60.962	65.914	3.641	62.101	1.139	22.81	61.104	0.142	3.551						0
										biomassa >20mm: 0.193				32	28.572	32.916	4.344	3.325	29.346	0.774	21.7	28.631	0.059	3.267				32	28.572	32.339	2.92	29.24	0.668	21.38	28.651	0.079	2.79						0
														55	29.255	32.464	3.209	2.434	29.817	0.562	19.93	28.267	0.098	2.373				31	31.403	34.222	2.147	32.004	0.601	19.79	31.477	0.074	2.036						0
B7												7		54	28.834	33.154	4.32	3.579	29.378	0.544	23.05	28.958	0.124	3.526				36	28.315	30.797	1.89	28.785	0.47	19.08	28.378	0.063	1.793						0
	36	28.315	32.165	3.85	2.954	29.086	0.771	20.62	28.425	0.11	2.844			53	25.836	28.077	2.241	1.749	26.137	0.301	17.98	25.899	0.063	1.7			c10	35	43.461	46.071	2.057	43.861	0.4	18.2	43.532	0.071	1.968						0
	47	42.958	46.615	3.657	2.655	43.835	0.877	20.53	43.069	0.111	2.555			51	29.702	33.652	3.95	2.945	30.333	0.631	21.21	29.805	0.103	2.895				34	48.526	50.629	1.661	48.879	0.353	16.95	48.572	0.046	1.577						0
	49	41.618	43.563	1.945	1.506	42.02	0.402	17.14	41.676	0.058	1.434			59	27.299	28.673	1.374	1.112	27.45	0.151	15.35	27.332	0.033	1.064																			0
	44	43.334	46.055	2.721	2.022	43.925	0.591	18.57	43.424	0.09	1.93			28	43.271	43.765	0.494	0.39	43.314	0.043	10.56	43.291	0.02	0.374											biomassa total:0.812								0
	43	42.312	45.057	2.745	2.026	42.804	0.492	18.78	42.386	0.074	1.973					0.198	0.198	0.198			8.25		0.01												Biomassa >20mm: 0.558								0
	50	31.497	32.16	0.663	0.535	31.615	0.118	11.81	31.524	0.027	0.495					0.074	0.074	0.074			6.16		0.01																				0
	45	42.428	43.138	0.71	0.554	42.516	0.088	12.5	42.445	0.017	0.538			1	9.704	13.388	3.684	2.806	10.469	0.765	20.65	9.792	0.088	2.716																			0
										BT=0.487				2	9.285	12.628	3.343	2.409	10.062	0.777	20.4	9.372	0.087	2.347																			0
										biomassa > 20mm: 0.266				3	9.471	13.047	3.576	2.662	10.15	0.679	20.33	9.567	0.096	2.562																			0
														4	9.733	13.803	4.07	3.134	10.478	0.745	23.22	9.848	0.115	3.054																			0
B8						.						12		5	9.048	12.245	3.197	2.381	9.527	0.479	19.82	9.126	0.078	2.287																			0
	67	44.525	48.304	3.779	2.82	45.35	0.825	20.74	44.65	0.125	2.71			7	9.075	12.183	3.108	2.491	9.658	0.583	19.39	9.164	0.089	2.403																			0
	68	44.385	47.485	3.1	2.41	44.936	0.551	19.58	44.459	0.074	2.353			8	16.073	20.205	4.132	3.366	16.711	0.638	21.49	16.151	0.078	3.271																			0
	69	41.512	44.985	3.473	2.725	42.135	0.623	20.15	41.583	0.071	2.66			9	9.316	12.65	3.334	2.708	9.828	0.512	20.3	9.408	0.092	2.59																			0
	70	53.569	58.442	4.873	3.509	54.666	1.097	22.59	53.695	0.126	3.41			10	17.712	21.86	4.148	2.933	18.692	0.98	22.86	17.826	0.114	2.812																			0
	71	41.671	45.978	4.307	3.513	42.291	0.62	22.59	41.749	0.078	3.411			11	21.906	25.818	3.912	3.247	22.49	0.584	21.39	22.015	0.109	3.118																			0
	72	39.894	42.886	2.992	2.53	40.213	0.319	20.16	39.903	0.009	2.465			12	15.025	18.9	3.875	2.795	15.756	0.731	21.98	15.128	0.103	2.678																			0
	73	42.297	45.476	3.179	2.462	42.82	0.523	19.6	42.365	0.068	2.369			13	18.501	20.511	2.01	1.627	18.818	0.317	17.27	18.562	0.061	1.523																			0
	74	49.487	53.283	3.796	2.785	50.283	0.796	21.17	49.58	0.093	2.678			14	17.816	21.931	4.115	3.409	18.404	0.588	22.28	17.91	0.094	3.272																			0
	75	42.729	45.898	3.169	2.385	43.37	0.641	19.66	42.817	0.088	2.321			15	16.476	19.556	3.08	2.442	16.942	0.466	20.83	16.555	0.079	2.357																			0
	76	58.821	62.027	3.206	2.474	59.382	0.561	18.98	58.907	0.086	2.364			16	16.95	19.955	3.005	2.368	17.443	0.493	19.62	17.021	0.071	2.304																			0
	77	43.899	45.815	1.916	1.349	44.291	0.392	17.35	43.945	0.046	1.305			17	18.908	25.459	6.551	5.141	20.06	1.152	26.69	19.09	0.182	4.967																			0
			0.326	0.326			0	9.93		0.01				18	17.694	21.524	3.83	3.119	18.23	0.536	21.48	17.778	0.084	3.026																			0
										BT=0				21	15.265	18.252	2.987	2.344	15.745	0.48	19.64	15.346	0.081	2.241																			0
										biomassa > 20mm:				56	20.103	22.832	2.729	1.993	20.708	0.605	19.24	20.168	0.065	1.923																			0
														50	31.497	35.232	3.735	2.78	32.165	0.668	21.41	31.593	0.096	2.713																			0
B9												4		30	43.393	46.114	2.721	2.053	43.791	0.398	19.33	43.465	0.072	1.984																			0
	46	44.575	45.827	1.252	1.005	44.769	0.194	14.7	44.59	0.015	0.94			27	43.262	43.882	0.62	0.477	43.337	0.075	11.39	43.282	0.02	0.455																			0
			0.222	0.222			0	8.94		0.01				58	30.493	31.276	0.783	0.623	30.592	0.099	12.01	30.508	0.015	0.598																			0
			0.071	0.071			0	6.01	biomassa total: 0.045	0.01				53	25.836	26.757	0.921	0.775	25.907	0.071	13.4	25.867	0.031	0.726																			0
			0.028	0.028			0	4.9		0.01							0						biomassa total: 2.780																				0
B10												0					0						biomassa >20mm: 1.903																				0
							0						B10				0									13																	0
							0							1	9.704	13.733	4.029	3.001	10.335	0.631	22.13	9.786	0.082	2.859																			0
C1												8		3	9.471	13.633	4.162	3.217	9.792	0.321	21	9.556	0.085	0.531																			0
	78	67.799	71.739	3.94	3.038	68.575	0.776	21.86	67.903	0.104	2.94			4	9.733	11.476	1.743	1.37	10.049	0.316	15.52	9.771	0.038	1.309																			0
	79	65.116	68.059	2.943	2.319	65.638	0.522	19.01	65.196	0.08	2.232			5	9.048	12.28	3.232	2.527	9.66	0.612	19.64	9.121	0.073	2.382																			0
	80	101.334	106.283	4.949	3.639	102.457	1.123	24.09	101.49	0.156	3.518			7	9.075	10.048	0.973	0.758	9.248	0.173	13.67	9.101	0.026	0.706																			0
														8	16.073	16.996	0.923	0.735	16.176	0.103	12.97	15.278	0.01	0.704																			0
														9	9.316	10.298	0.982	0.756	9.499	0.183	13.34	9.404	0.088	0.72																			0
	81	104.311	108.219	3.908	3.08	105.013	0.702	20.52	104.439	0.128	2.985			10	17.712	18.778	1.066	0.845	17.867	0.155	14.25	17.726	0.014	0.81																			0
	82	102.779	106.62	3.841	3.005	103.472	0.693	22.67	102.896	0.117	2.939			11	21.906	22.594	0.688	0.573	21.978	0.072	12.67	21.918	0.012	0.555																			0
	83	104.478	107.918	3.44	2.913	105.011	0.533	21.13	104.601	0.123	2.812						0	0.305			9.25		0.01																				0
	63	43.292	46.631	3.339	2.567	43.854	0.562	19.87	43.387	0.095	2.487						0	0.208			8.4		0.01																				0
																	0	0.182			7.52		0.01																				0
																	0	0.104			6.44		0.01																				0
	31	31.403	33.765	2.362	1.843	31.833	0.43	18.13	31.471	0.068	1.743						0						biomassa total: 0.468																				0
				0						biomassa total:0.871							0						biomassa >20mm: 0.167																				0
				0						biomassa >20mm:0.628			C1				0									3																	0
				0												0.381	0.381				9.8		0.01																				0
C2		.										7				0.075	0.075				5.59		0.01																				0
	21	15.265	21.46	6.195	4.455	16.847	1.582	25.52	15.446	0.181	4.327			20	51.479	54.439	2.96	2.367	51.925	0.446	19.77	51.553	0.074	2.287																			0
	14	17.816	19.208	1.392	1.043	18.138	0.322	15.37	17.853	0.037	0.983						0				7.695		biomassa total: 0.094																				0
	32	28.572	30.979	2.407	1.843	28.969	0.397	18.27	28.629	0.057	1.77						0						biomassa >20mm: 0																				0
	51	29.702	31.085	1.383	1.105	29.894	0.192	15.07	29.732	0.03	1.066		C2				0									18																	0
	56	20.103	21.17	1.067	0.858	20.265	0.162	14.69	20.113	0.01	0.813			13	18.501	21.519	3.018	2.67	18.833	0.332	21.08	18.579	0.078	2.604																			0
	29	33.418	33.996	0.578	0.445	24.22	9.198	11.42	33.433	0.015	0.43			14	17.816	21.269	3.453	2.737	18.399	0.583	20.99	17.818	0.002	2.609																			0
	30	43.393	43.553	0.16	1.21225			7.77		0.01				15	16.476	19.552	3.076	2.546	16.899	0.423	19.76	16.53	0.054	2.406																			0
				0				14.964		biomassa total:0.340				16	16.95	22.881	5.931	4.693	17.925	0.975	25.81	17.16	0.21	4.459																			0
				0						biomassa >20mm:0.181				17	18.908	22.487	3.579	2.866	19.511	0.603	22.54	18.993	0.085	2.752																			0
C3												14		18	17.694	20.262	2.568	1.963	18.191	0.497	19.08	17.751	0.057	1.889																			0
	30	43.393	46.409	3.016	2.182	43.864	0.471	19.87	43.465	0.072	2.101			19	20.108	23.604	3.496	2.974	20.495	0.387	20.51	20.177	0.069	2.823																			0
	54	28.834	31.71	2.876	2.296	29.363	0.529	20.27	28.926	0.092	2.215			21	15.265	19.793	4.528	3.515	16.167	0.902	21.68	15.372	0.107	3.403																			0
	34	48.526	51.968	3.442	2.526	49.221	0.695	20.86	48.615	0.089	2.439			29	33.418	38.624	5.206	4.02	34.399	0.981	22.41	33.592	0.174	3.868																			0
	61	43.34	45.929	2.589	2.004	43.77	0.43	18.21	43.4	0.06	1.955			54	28.834	30.696	1.862	1.413	29.151	0.317	16.52	27.939	0.089	1.549																			0
	25	51.794	54.489	2.695	2.003	52.356	0.562	18.7	51.866	0.072	1.951			26	26.902	29.954	3.052	2.457	27.388	0.486	20.11	26.976	0.074	2.383																			0
	15	16.476	19.958	3.482	2.72	17.01	0.534	21	16.55	0.074	2.638			65	51.7	54.6	2.9	2.506	52.056	0.356	19.83	51.78	0.08	2.436																			0
	24	25.063	26.777	1.714	1.303	25.34	0.277	16.8	25.102	0.039	1.277			31	31.403	32.824	1.421	1.132	31.58	0.177	15.95	28.685	0.07	1.073																			0
	59	27.299	28.659	1.36		27.572	0.273	14.59	27.334	0.035	1.021			57	28.246	32.126	3.88	3.062	28.772	0.526	21.49	28.331	0.085	2.92																			0
	23	28.752	28.89	0.138				6.73		0.01				62	43.107	46.755	3.648	2.908	43.703	0.596	21.67	43.209	0.102	2.821																			0
	52	25.266	25.312	0.046				4.36		0.01				61	43.34	43.953	0.613	0.542	43.403	0.063	12.05	43.364	0.024	0.525																			0
	53	25.836	25.974	0.138				7.09		0.01				68	44.385	45.167	0.782	0.622	44.491	0.106	12.95	44.403	0.018	0.581																			0
	28	43.271	43.859	0.588	0.45	43.372	0.101	11.36	43.292	0.021	0.438						0						biomassa total: 1.378																				0
	38	42.236	42.263	0.027				3.81		0.01							0						biomassa >20mm: 0.986																				0
	35	43.461	43.501	0.04				2.93		0.01			C3				0									6																	0
C4												18				0.101	0.101				6.32		0.01																				0
	8	16.073	16.457	0.384	0.321	16.107	0.034	10.55	16.078	0.005	0.311					0.075	0.075				6.03		0.01																				0
	12	15.025	15.045	0.02				3.64		0.01				16	16.95	19.058	2.108	1.613	17.282	0.332	17.71	16.998	0.048	1.567																			0
	13	18.501	18.761	0.26				9.51		0.01				17	18.908	23.201	4.293	3.222	19.761	0.853	23.05	19.039	0.131	3.087																			0
	14	17.816	17.884	0.068				5.73		0.01				18	17.694	20.715	3.021	2.159	18.364	0.67	20.82	17.771	0.077	2.09																			0
	16	16.95	19.582	2.632	2.128	17.303	0.353	17.81	16.99	0.04	2.072			19	20.108	23.517	3.409	2.598	20.651	0.543	20.03	20.189	0.081	2.509																			0
	17	18.908	21.557	2.649	1.977	19.409	0.501	19.22	18.996	0.088	1.895						0						biomassa total: 0.357																				0
	18	17.694	18.488	0.794	0.671	17.798	0.104	13.23	17.701	0.007	0.643						0						biomassa >20mm: 0.289																				0
	19	20.108	21.285	1.177	0.945	20.309	0.201	15.35	20.134	0.026	0.908		C4				0									7																	0
	20	51.479	51.937	0.458	0.365	51.554	0.075	10.77	51.494	0.015	0.355			1	9.704	12.561	2.857	2.526	10.009	0.305	19.86	9.781	0.077	2.436																			0
	21	15.265	15.289	0.024				3.8		0.01				2	9.285	12.903	3.618	3.342	9.546	0.261	19.63	9.349	0.064	2.256																			0
	22	26.702	30.438	3.736	2.771	27.588	0.886	21.67	26.836	0.134	2.68			3	9.471	12.379	2.908	2.489	9.84	0.369	19.38	9.548	0.077	2.373																			0
	62	43.107	45.145	2.038	1.63	43.4	0.293	15.44	43.158	0.051	1.58			9	9.316	11.213	1.897	1.705	9.491	0.175	17.14	9.356	0.04	1.645																			0
	57	28.246	31.649	3.403	2.611	28.921	0.675	21.16	28.334	0.088	2.507			4	9.733	12.324	2.591	2.263	10.02	0.287	20.02	9.801	0.068	2.204																			0
	27	43.262	47.134	3.872	2.948	43.989	0.727	17.04	43.38	0.118	2.871			5	9.048	12.822	3.774	2.849	9.691	0.643	21.68	9.142	0.094	2.731																			0
	58	30.493	32.508	2.015	1.595	30.746	0.253	19.48	30.531	0.038	1.56			7	9.075	13.152	4.077	3.407	9.692	0.617	22.11	9.19	0.115	2.274																			0
	55	29.255	32.031	2.776	2.23	29.711	0.456	18.74	29.32	0.065	2.148						0																										0
	60	43.459	45.979	2.52	2.049	43.838	0.379	22.09	43.529	0.07	1.993						0						biomassa total: 0.357																				0
	26	26.902	27.818	0.916	6.737	27.013	0.111	13.23	26.922	0.02	0.715						0						biomassa >20mm: 0.289																				0
										biomassa total: 0.805			C5				0									3																	0
										biomassa >20mm:0.292						0.126	0.126				7.14		0.01																				0
																0.283	0.283				9.52		0.01																				0
C5												12				0.159	0.159				7.5		0.01																				0
	1	9.704	13.652	3.948	3.191	10.377	0.673	21.85	9.813	0.109	3.104						0						biomassa total: 0.030																				0
	2	9.285	15.291	6.006	4.31	10.718	1.433	24.72	9.444	0.159	4.106						0						biomassa >20mm: 0																				0
	3	9.471	13.568	4.097	3.089	10.27	0.799	22.3	9.591	0.12	2.988		C6				0									5																	0
	4	9.733	13.132	3.399	2.476	10.439	0.706	21.34	9.83	0.097	2.414			72	39.894	41.017	1.123	1.055	39.931	0.037	14.69	39.853	0.04	1.019																			0
	5	9.048	13.061	4.013	2.953	9.893	0.845	21.12	9.164	0.116	2.891			69	41.512	43.67	2.158	1.796	41.752	0.24	16.42	41.524	0.012	1.742																			0
	6	9.776	14.797	5.021	3.972	10.681	0.905	22.13	9.926	0.15	3.822			46	44.575	50.605	6.03	4.517	45.702	1.127	25.6	44.754	0.179	4.362																			0
	7	9.075	14.436	5.361	3.906	10.267	1.192	23.47	9.225	0.15	3.748					0.236	0.236				8.72		0.01																				0
	9	9.316	14.845	5.529	3.908	10.726	1.41	24.76	9.504	0.188	3.698					0.389	0.389				9.84		0.01																				0
	10	17.712	19.474	1.762	1.412	17.465	0.247	15.81	17.755	0.043	1.354						0						biomassa total: 0.251																				0
			0.042	0.042				4.67		0.01							0						biomassa >20mm: 0.179																				0
			0.017	0.017				4.09		0.01							0																										0
			0.035	0.035				4.92		0.01			C7				0									10																	0
										biomassa total;1.162				a1	0.864	3.028	2.164	1.699	1.221	0.357	17.08	0.913	0.049	1.649																			0
										biomassa >20mm: 1.089				a2	0.937	5.13	4.193	3.715	1.316	0.379	22.82	1.018	0.081	3.758																			0
														a3	1.022	5.914	4.892	3.715	2.106	1.084	23.03	1.17	0.148	3.488																			0
C6												2		a4	0.736	4.992	4.256	3.435	1.376	0.64	24.29	0.841	0.105	3.292																			0
	12	15.025	21.317	6.292	4.479	16.438	1.413	24.71	15.191	0.166	4.347			a5	1.25	3.826	2.576	1.919	1.671	0.421	17.88	1.293	0.043	1.823																			0
	13	18.501	22.08	3.579	2.6	19.292	0.791	21.4	18.597	0.096	2.487			a6	0.792	5.246	4.454	3.568	1.605	0.813	24.47	0.915	0.123	3.449																			0
										biomassa total;0.262				a7	0.964	5.632	4.668	3.677	1.886	0.922	24.04	1.199	0.235	3.554																			0
										biomassa >20mm: 0.262				a8	0.916	7.435	6.519	4.934	2.39	1.474	25.91	1.072	0.156	4.774																			0
														a9	0.961	4.504	3.543	3.044	1.38	0.419	21.11	1.027	0.066	2.947																			0
C7												8		a10	0.862	0.273					9.15		0.01																				0
	36	28.315	32.885	4.57	3.491	29.278	0.963	23.05	28.437	0.122	3.376						0						biomassa total: 1.016																				0
	37	44.759	49.576	4.817	3.556	45.902	1.143	22.24	44.913	0.154	3.415						0						biomassa >20mm: 0.914																				0
	39	60.962	63.436	2.474	1.843	61.477	0.515	19.09	53.536	0.074	1.758		C8				0									2																	0
	41	42.499	44.081	1.582	1.209	42.763	0.264	15.97	42.526	0.027	1.16			34	48.526	53.2	4.674	3.621	49.285	0.759	22.68	48.658	0.132	3.505																			0
	42	42.249	45.945	3.696	2.761	43.044	0.795	21.3	42.351	0.102	2.648			71	41.671	41.916	0.245	0.243	41.651	-0.02	10.06	41.624		0.228																			0
	43	42.312	48.093	5.781	4.811	43.208	0.896	26.86	42.473	0.161	4.637						0						biomassa total: 0.142																				0
	44	43.334	48.754	5.42	3.817	44.665	1.331	24.71	43.498	0.164	3.689						0						biomassa >20mm: 0.132																				0
	45	42.428	47.678	5.25	3.968	43.594	1.166	23.27	42.57	0.142	3.819		C9				0									16																	0
										biomassa total:0.946				69	41.512	43.136	1.624	1.318	41.668	0.156	16.72	41.513	0.01	1.277																			0
										biomassa >20mm: 0.845				70	53.569	55.78	2.211	1.932	53.81	0.241	18.58	53.631	0.062	1.907																			0
														71	41.671	44.533	2.862	2.377	42.067	0.396	21.58	41.734	0.063	2.311																			0
C8												17		72	39.894	43.366	3.472	2.914	40.318	0.424	22.66	39.938	0.044	2.848																			0
	46	44.575	46.09	1.515	1.261	44.816	0.241	15.12	44.609	0.034	1.193			47	42.958	44.832	1.874	1.688	43.111	0.153	17.16	42.986	0.028	1.64																			0
	47	42.958	45.67	2.712	2.187	43.454	0.496	19.71	43.027	0.069	2.109			75	42.729	45.907	3.178	2.756	43.095	0.366	21.22	42.821	0.092	2.717																			0
	49	41.618	43.517	1.899	1.496	41.983	0.365	21.42	41.672	0.054	1.436			76	58.821	63.017	4.196	3.582	59.337	0.516	23.95	58.962	0.141	3.511																			0
	50	31.497	35.021	3.524	2.698	32.239	0.742	23.51	31.593	0.096	2.575					0.218	0.218				9		0.01																				0
	65	51.7	55.547	3.847	3.034	52.432	0.732	23.21	51.828	0.128	2.953					0.317	0.317				9.98		0.01																				0
	66	41.648	46.14	4.492	3.579	42.413	0.765	21.11	41.781	0.133	3.42					0.202	0.202				8.45		0.01																				0
	71	41.671	46.108	4.437	3.5	42.468	0.797	21.99	41.755	0.084	3.388					0.166	0.166				7.8		0.01																				0
	72	39.894	43.33	3.436	2.807	40.429	0.535	20.54	39.915	0.021	2.694					0.31	0.31				9.43		0.01																				0
	73	42.297	44.54	2.243	1.836	42.652	0.355	18.12	42.34	0.043	1.745					0.233	0.233				9.16		0.01																				0
	76	58.821	62.304	3.483	2.598	59.523	0.702	18.87	58.932	0.111	2.501					0.22	0.22				8.65		0.01																				0
	77	43.899	44.789	0.89	0.743	44.024	0.125	14.27	43.918	0.019	0.706					0.174	0.174				7.97		0.01																				0
	40	63.815	64.61	0.795	0.6	63.918	0.103	13.56	63.833	0.018	0.558					0.027	0.027				4.49		0.01																				0
	79	65.116	65.578	0.462	0.326	65.182	0.066	10.72	65.123	0.007	0.308						0						biomassa total: 0.530																				0
			0.319	0.319				9.94		0.01							0						biomassa >20mm: 0.34																				0
			0.055	0.055				5.19		0.01							0																										0
			0.029	0.029				5.1		0.01			C10				0									9																	0
										biomassa total:0.847						0.198	0.198				8.76		0.01																				0
										biomassa >20mm: 0.520						0.274	0.274				9.01		0.01																				0
																0.346	0.346				9.79		0.01																				0
C9												6				0.167	0.167				7.77		0.01																				0
	35	43.461	48.529	5.068	3.658	44.61	1.149	23.94	43.622	0.161	3.533			14	17.816	18.196	0.38	0.306	17.85	0.034	10.68	17.826	0.01	0.294																			0
	52	25.266	27.698	2.432	1.785	25.788	0.522	19.19	25.349	0.083	1.72			13	18.501	18.942	0.441	0.354	18.537	0.036	10.52	18.524	0.023	0.336																			0
	38	42.236	48.924	6.688	4.834	43.88	1.644	25.25	43.39	1.154	4.631			12	15.025	15.893	0.868	0.692	15.083	0.058	13.51	15.037	0.012	0.675																			0
	53	25.836	30.309	4.473	3.261	26.748	0.912	22	25.955	0.119	3.147			7	9.075	10.805	1.73	1.477	9.25	0.175	16.83	9.122	0.047	1.448																			0
	23	28.752	32.535	3.783	2.839	29.424	0.672	21.79	28.858	0.106	2.712			15	16.476	16.807	0.331	0.313	16.487	0.011	10.63	16.48	0.004	0.302																			0
	11	21.906	22.32	0.414	0.293	21.965	0.059	10.36	21.922	0.016	0.286																																0
										biomassa total:1.639													biomassa total: 0.136																				0
										biomassa >20mm: 1.540													biomassa >20mm: 0.34																				0
C10												1																															0
			0.022	0.022			0	4.37		0.01																																	0
										biomassa total:0.010																																	0
																																											0
																																											0
																																											0
																																											0
																																											0
																																											0
																																											0
																																											0
																																											0
																																											0
																																											0
																																											0
																																											0
																																											0
																																											0
																																											0
																																											0
																																											0
																																											0
																																											0
																																											0
																																											0
																																											0
																																											0
																																											0
																																											0
																																											0
																																											0
																																											0
																																											0
																																											0
																																											0
																																											0
																																											0
																																											0
																																											0
																																											0
																																											0
																																											0
																																											0
																																											0
																																											0
																																											0
																																											0
																																											0
																																											0
																																											0
																																											0
																																											0
																																											0
																																											0
																																											0
																																											0
																																											0
																																											0
																																											0
																																											0
																																											0
																																											0
																																											0
																																											0
																																											0
																																											0
																																											0
																																											0
																																											0
																																											0
																																											0
																																											0
																																											0
																																											0
																																											0
																																											0
																																											0
																																											0
																																											0
																																											0
																																											0
																																											0
																																											0
																																											0
																																											0
																																											0
																																											0
																																											0
																																											0
																																											0
																																											0
																																											0
																																											0
																																											0
																																											0
																																											0
																																											0
																																											0
																																											0
																																											0
																																											0
																																											0
																																											0
																																											0
																																											0
																																											0
																																											0
																																											0
																																											0
																																											0
																																											0
																																											0
																																											0
																																											0
																																											0
																																											0
																																											0
																																											0
																																											0
																																											0
																																											0
																																											0
																																											0
																																											0
																																											0
																																											0
																																											0
																																											0
																																											0
																																											0
																																											0
																																											0
																																											0
																																											0
																																											0
																																											0
																																											0
																																											0
																																											0
																																											0
																																											0
																																											0
																																											0
																																											0
																																											0
																																											0
																																											0
																																											0
																																											0
																																											0
																																											0
																																											0
																																											0
																																											0
																																											0
																																											0
																																											0
																																											0
																																											0
																																											0
																																											0
																																											0
																																											0
																																											0
																																											0
																																											0
																																											0
																																											0
																																											0
																																											0
																																											0
																																											0
																																											0
																																											0
																																											0
																																											0
																																											0
																																											0
																																											0
																																											0
																																											0
																																											0
																																											0
																																											0
																																											0
																																											0
																																											0
																																											0
																																											0
																																											0
																																											0
																																											0
																																											0
																																											0
																																											0
																																											0
																																											0
																																											0
																																											0
																																											0
																																											0
																																											0
																																											0
																																											0
																																											0
																																											0
																																											0
																																											0
																																											0
																																											0
																																											0
																																											0
																																											0
																																											0
																																											0
																																											0
																																											0
																																											0
																																											0
																																											0
																																											0
																																											0
																																											0
																																											0
																																											0
																																											0
																																											0
																																											0
																																											0
																																											0
																																											0
																																											0
																																											0
																																											0
																																											0
																																											0
																																											0
																																											0
																																											0
																																											0
																																											0
																																											0
																																											0
																																											0
																																											0
																																											0
																																											0
																																											0
																																											0
																																											0
																																											0
																																											0
																																											0
																																											0
																																											0
																																											0
																																											0
																																											0
																																											0
																																											0
																																											0
																																											0
																																											0
																																											0
																																											0
																																											0
																																											0
																																											0
																																											0
																																											0
																																											0
																																											0
																																											0
																																											0
																																											0
																																											0
																																											0
																																											0
																																											0
																																											0
																																											0
																																											0
																																											0
																																											0
																																											0
																																											0
																																											0
																																											0
																																											0
																																											0
																																											0
																																											0
																																											0
																																											0
																																											0
																																											0
																																											0
																																											0
																																											0
																																											0
																																											0
																																											0
																																											0
																																											0
																																											0
																																											0
																																											0
																																											0
																																											0
																																											0
																																											0
																																											0
																																											0
																																											0
																																											0
																																											0
																																											0
																																											0
																																											0
																																											0
																																											0
																																											0
																																											0
																																											0
																																											0
																																											0
																																											0
																																											0
																																											0
																																											0
																																											0
																																											0
																																											0
																																											0
																																											0
																																											0
																																											0
																																											0
																																											0
																																											0
																																											0
																																											0
																																											0
																																											0
																																											0
																																											0
																																											0
																																											0
																																											0
																																											0
																																											0
																																											0
																																											0
																																											0
																																											0
																																											0
																																											0
																																											0
																																											0
																																											0
																																											0
																																											0
																																											0
																																											0
																																											0
																																											0
																																											0
																																											0
																																											0
																																											0
																																											0
																																											0
																																											0
																																											0
																																											0
																																											0
																																											0
																																											0
																																											0
																																											0
																																											0
																																											0
																																											0
																																											0
																																											0
																																											0
																																											0
																																											0
																																											0
																																											0
																																											0
																																											0
																																											0
																																											0
																																											0
																																											0
																																											0
																																											0
																																											0
																																											0
																																											0
																																											0
																																											0
																																											0
																																											0
																																											0
																																											0
																																											0
																																											0
																																											0
																																											0
																																											0
																																											0
																																											0
																																											0
																																											0
																																											0
																																											0
																																											0
																																											0
																																											0
																																											0
																																											0
																																											0
																																											0
																																											0
																																											0
																																											0
																																											0
																																											0
																																											0
																																											0
																																											0
																																											0
																																											0
																																											0
																																											0
																																											0
																																											0
																																											0
																																											0
																																											0
																																											0
																																											0
																																											0
																																											0
																																											0
																																											0
																																											0
																																											0
																																											0
																																											0
																																											0
																																											0
																																											0
																																											0
																																											0
																																											0
																																											0
																																											0
[truncated: 122 more columns]

## Sheet: ANOVA
Year	Station	Area	Month	Total weight	U.W Shell weight	w.w.Meat weight	Shell lenght(mm)	D.W. Meat weight	D.W. Shell weight	Rain fall	Meat Yield (Wb/Wt)	Condition index(Wb/Wsh)
2009	1	A	3	3.559	2.511	0.686	21.41	0.082	2.431	58	0.192751	0.033731
2009	1	A	3	0.011			3.3	0.01		184	0
2009	1	A	3	0.015			3.13	0.01		184	0
2009	1	A	3	0.044			3.88	0.01		184	0
2009	1	A	3	0.027			4.56	0.01		184	0
2009	1	A	3	0.112			6.27	0.01		184	0
2009	1	A	3	0.099			6.5	0.01		184	0
2009	1	A	3	0.142	0.09	0.052	6.97	0.01	0.092	184	0.366197	0.108696
2009	1	A	3	0.178	0.118	0.018	7.4	0.004	0.11	184	0.101124	0.0363636
2009	1	A	3	0.209	0.153	0.011	8.37	0.01	0.155	184	0.0526316	0.0645161
2009	1	A	3	0.311	0.244	0.027	9.16	0.007	0.245	184	0.0868167	0.0285714
2009	1	A	3	0.344	0.258	0.012	9.68	0.004	0.259	184	0.0348837	0.015444
2009	1	A	3	0.465	0.339	0.039	10.94	0.013	0.331	184	0.083871	0.0392749
2009	1	A	3	0.534	0.418	0.041	11.1	0.01	0.409	184	0.076779	0.0244499
2009	1	A	3	2.282	1.702	0.307	17.53	0.064	1.664	184	0.134531	0.0384615
2009	1	A	3	2.206	1.617	0.317	18.01	0.058	1.574	184	0.143699	0.0368488
2009	1	A	3	2.896	2.159	0.377	18.41	0.062	2.126	184	0.13018	0.0291627
2009	1	A	3	2.445	1.773	0.476	18.69	0.064	1.725	184	0.194683	0.0371014
2009	1	A	3	3.117	2.384	0.355	18.74	0.072	2.343	184	0.113892	0.0307298
2009	1	A	3	3.356	2.517	0.428	19.49	0.063	2.493	184	0.127533	0.0252708
2009	1	A	3	3.723	2.732	0.633	20.17	0.101	2.649	184	0.170024	0.0381276
2009	1	A	3	2.645	2.314	0.412	20.19	0.068	2.113	184	0.155766	0.0321817
2009	1	A	3	4.519	3.291	0.744	22.3	0.114	3.234	184	0.164638	0.0352505
2009	1	A	3	4.206	2.736	0.486	23.47	0.074	2.692	184	0.115549	0.0274889
2009	1	A	3	2.973	2.229	0.458	19.07	0.057	2.18	184	0.154053	0.0261468
2009	1	A	3	2.289	1.689	0.238	17.26	0.041	1.66	184	0.103976	0.0246988
2009	1	A	3	2.306	1.672	0.266	18.25	0.04	1.632	184	0.115351	0.0245098
2009	1	A	3	1.698	1.288	0.349	15.14	0.041	1.269	184	0.205536	0.0323089
2009	1	A	3	0.221	0.165	0.024	9	0.001	0.176	184	0.108597	0.00568182
2009	1	A	3	0.051			5.05	0.001		184	0
2009	1	A	3	0.939	0.748	0.083	13.2	0.014		184	0.0883919
2009	1	A	3	3.752	3.23	0.52	22	0.095		184	0.138593
2009	1	A	3	3.512	2.541	0.417	20.81	0.055		184	0.118736
2009	1	A	3	3.044	2.231	0.591	19	0.088		184	0.194152
2009	1	A	3	2.65	2	0.284	19.35	0.054		184	0.10717
2009	1	A	3	0.275			9.43	0.001		184	0
2009	1	A	3	2.133	1.524	0.415	17.4	0.028		184	0.194562
2009	1	A	3	0.132			6.9	0.001		184	0
2009	1	A	3	0.192			8.51	0.001		184	0
2009	1	A	3	0.133			7.18	0.001		184	0
2009	1	A	3	3.46	2.516	0.577	21.67	0.088	2.463	184	0.166763	0.0357288
2009	1	A	3	0.272			9.3	0.001		184	0
2009	1	A	3	0.192			8.53	0.001		184	0
2009	1	A	3	0.056			5.46	0.001		184	0
2009	1	A	3	0.006			3.6	0.001		184	0
2009	1	A	3	0.135			7.2	0.001		184	0
2009	1	A	3	0.043			5.37	0.001		184	0
2009	1	A	3	0.022			4.66	0.001		184	0
2009	1	A	3	1.69	1.25	0.252	16.2	0.035	1.207	184	0.149112	0.0289975
2009	1	A	3	2.464	1.913	0.279	17.94	0.038	1.834	184	0.113231	0.0207197
2009	1	A	3	4.488	3.111	1.022	23.25	0.11	2.989	184	0.227718	0.0368016
2009	1	A	3	3.528	2.628	0.493	20.46	0.076	2.561	184	0.139739	0.0296759
2009	1	A	3	2.855	2.081	0.345	18.98	0.053	2.038	184	0.120841	0.0260059
2009	1	A	3	2.37	1.757	0.361	18.56	0.079	1.678	184	0.152321	0.0470799
2009	1	A	3	3.975	2.873	0.519	21.93	0.087	2.75	184	0.130566	0.0316364
2009	1	A	3	2.952	2.065	0.449	20.05	0.065	2.005	184	0.1521	0.032419
2009	1	A	3	3.536	2.585	0.332	20.72	0.067	2.553	184	0.0938914	0.0262436
2009	1	A	3	1.862	1.345	0.297	17.72	0.044	1.271	184	0.159506	0.0346184
2009	1	A	3	1.934	1.495	0.296	16.31	0.046	1.44	184	0.153051	0.0319444
2009	1	A	3	2.504	1.948	0.304	17.24	0.054	1.901	184	0.121406	0.0284061
2009	1	A	3	3.479	2.545	0.465	20.52	0.08	2.444	184	0.133659	0.0327332
2009	1	A	3	0.277			9.03	0.001		184	0
2009	1	A	3	5.687	3.628	1.242	23.81	0.127	3.531	184	0.218393	0.0359671
2009	1	A	3	0.021			3.67	0.001		184	0
2009	1	A	3	0.018			3.63	0.001		184	0
2009	1	A	3	5.404	3.779	1.124	24.34	0.092	3.649	184	0.207994	0.0252124
2009	1	A	3	4.44	3.242	0.76	23.15	0.101	3.063	184	0.171171	0.0329742
2009	1	A	3	3.643	2.71	0.837	27.09	0.096	2.595	184	0.229756	0.0369942
2009	1	A	3	3.745	2.744	0.681	21.79	0.084	2.655	184	0.181842	0.0316384
2009	1	A	3	4.459	3.347	0.811	21.1	0.07	3.231	184	0.181879	0.0216651
2009	1	A	3	4.484	3.414	0.931	22.42	0.106	3.262	184	0.207627	0.0324954
2009	1	A	3	3.791	2.786	0.586	21.61	0.085	2.723	184	0.154577	0.0312156
2009	1	A	3	2.625	1.989	0.441	18.65	0.054	1.91	184	0.168	0.0282723
2009	1	A	3	3.158	2.576	0.44	18.88	0.055	2.479	184	0.139329	0.0221864
2009	1	A	3	3.094	2.533	0.438	19.73	0.071	2.443	184	0.141564	0.0290626
2009	1	A	3	2.886	2.183	0.334	18.7	0.043	2.123	184	0.115731	0.0202544
2009	1	A	3	2.407	1.906	0.396	16.56	0.368	1.843	184	0.16452	0.199674
2009	1	A	3	0.392	0.3	0.039	10.28	0.015	0.285	184	0.0994898	0.0526316
2009	1	A	3	1.919	1.455	0.354	17.16	0.043	1.391	184	0.184471	0.030913
2009	1	A	3	0.557	0.099	0.051	11.31	0.013	0.409	184	0.0915619	0.0317848
2009	1	A	3	0.055			4.85	0.001		184	0
2009	1	A	3	0.023			4.1	0.001		184	0
2009	1	B	3	2.402	1.857	0.436	18.15	0.064	1.794	184	0.181515	0.0356745
2009	1	B	3	2.986	2.399	0.48	19.2	0.084	2.313	184	0.16075	0.0363165
2009	1	B	3	2.485	1.868	0.491	18.79	0.07	1.793	184	0.197586	0.0390407
2009	1	B	3	2.544	1.952	0.493	17.93	0.073	1.869	184	0.193789	0.0390583
2009	1	B	3	2.298	1.645	0.485	16.94	0.071	1.569	184	0.211053	0.0452518
2009	1	B	3	1.824	1.377	0.334	19.39	0.064	1.33	184	0.183114	0.0481203
2009	1	B	3	2.448	1.861	0.506	18.6	0.076	1.764	184	0.206699	0.0430839
2009	1	B	3	1.435	1.133	0.221	15.33	0.03	1.079	184	0.154007	0.0278035
2009	1	B	3	0.541	0.411	0.077	11.68	0.017	0.385	184	0.142329	0.0441558
2009	1	B	3	0.03			4.6	0.001		184	0
2009	1	B	3	0.158			8.09	0.001		184	0
2009	1	B	3	0.306			9.58	0.001		184	0
2009	1	B	3	0.081			5.57	0.001		184	0
2009	1	B	3	0.243			8.93	0.001		184	0
2009	1	B	3	0.576	0.449	0.054	11.53	0.01	0.433	184	0.09375	0.0230947
2009	1	B	3	0.36	0.272	0.042	10.23	0.01	0.25	184	0.116667	0.04
2009	1	B	3	0.246			9.04	0.001		184	0
2009	1	B	3	2.729	2.346	0.383	19.24	0.066	2.037	184	0.140344	0.0324006
2009	1	B	3	3.41	2.58	0.83	20.21	0.094	2.464	184	0.243402	0.0381494
2009	1	B	3	3.014	2.403	0.611	19.39	0.076	2.152	184	0.202721	0.035316
2009	1	B	3	2.243	1.809	0.434	17.5	0.058	1.689	184	0.193491	0.0343398
2009	1	B	3	3.426	2.798	0.628	21.55	0.082	2.4	184	0.183304	0.0341667
2009	1	B	3	2.406	1.994	0.412	18.68	0.062	1.743	184	0.171239	0.0355709
2009	1	B	3	3.437	2.83	0.607	22.67	0.102	2.62	184	0.176608	0.0389313
2009	1	B	3	4.914	3.76	1.154	23.74	0.159	3.491	184	0.234839	0.0455457
2009	1	B	3	3.017	2.484	0.533	19.34	0.086	2.303	184	0.176666	0.0373426
2009	1	B	3	3.165	2.403	0.762	20.65	0.1	2.218	184	0.240758	0.0450857
2009	1	B	3	3.308	2.592	0.716	20.44	0.104	2.272	184	0.216445	0.0457746
2009	1	B	3	2.495	2.054	0.441	18.18	0.064	1.821	184	0.176754	0.0351455
2009	1	B	3	0.689	0.575	0.114	12.26	0.019	0.521	184	0.165457	0.0364683
2009	1	B	3	0.549	0.456	0.093	11.74	0.013	0.393	184	0.169399	0.0330789
2009	1	B	3	0.441	0.389	0.052	11.15	0.016	0.363	184	0.117914	0.0440771
2009	1	B	3	0.573	0.506	0.067	11.4	0.018	0.462	184	0.116928	0.038961
2009	1	B	3	0.746	0.648	0.098	12.85	0.017	0.553	184	0.131367	0.0307414
2009	1	B	3	0.459	0.414	0.045	10.93	0.013	0.332	184	0.0980392	0.0391566
2009	1	B	3	0.271			9.44	0.01		184	0
2009	1	B	3	0.411	0.303	0.043	10.75	0.011	0.301	184	0.104623	0.0365449
2009	1	B	3	0.448	0.339	0.064	10.79	0.021	0.334	184	0.142857	0.0628743
2009	1	B	3	0.036		0	4.62	0.01		184	0
2009	1	B	3	0.02		0	3.78	0.01		184	0
2009	1	B	3	0.098		0	6.48	0.01		184	0
2009	1	B	3	2.569	2.163	0.363	18.33	0.067	2.112	184	0.1413	0.0317235
2009	1	B	3	3.634	2.688	0.798	20.43	0.146	2.59	184	0.219593	0.0563707
2009	1	B	3	2.941	2.412	0.47	20.49	0.118	2.319	184	0.15981	0.050884
2009	1	B	3	0.792	0.678	0.071	13	0.016	0.655	184	0.0896465	0.0244275
2009	1	B	3	0.436	0.344	0.054	12.41	0.016	0.326	184	0.123853	0.0490798
2009	1	B	3	0.479	0.381	0.062	13.18	0.018	0.348	184	0.129436	0.0517241
2009	1	B	3	0.656	0.549	0.074	10.47	0.015	0.512	184	0.112805	0.0292969
2009	1	B	3	0.394	0.317	0.068	10.25	0.798	0.292	184	0.172589	2.73288
2009	1	B	3	0.359	0.27	0.057	10.61	0.013	0.265	184	0.158774	0.0490566
2009	1	B	3	0.37	0.326	0.035	10.13	0.01	0.317	184	0.0945946	0.0315457
2009	1	B	3	0.29		0	9.72	0.001		184	0
2009	1	B	3	0.065		0	5.67	0.001		184	0
2009	1	B	3	0.045		0	5.14	0.001		184	0
2009	1	B	3	0.035		0	3.44	0.001		184	0
2009	1	B	3	0.01		0	4.39	0.001		184	0
2009	1	B	3	0.039		0	4.66	0.001		184	0
2009	1	B	3	0.037		0	4.53	0.001		184	0
2009	1	B	3	3.603	2.681	0.768	20.1	0.104	2.599	184	0.213156	0.0400154
2009	1	B	3	3.118	2.354	0.568	20.77	0.08	2.28	184	0.182168	0.0350877
2009	1	B	3	1.87	1.418	0.364	17.09	0.057	1.381	184	0.194652	0.0412744
2009	1	B	3	0.398	0.344	0.115	10.58	0.015	0.328	184	0.288945	0.0457317
2009	1	B	3	0.019			3.44	0.001		184	0
2009	1	B	3	0.039			4.58	0.001		184	0
2009	1	B	3	0.017			3.92	0.001		184	0
2009	1	B	3	0.01			3.17	0.001		184	0
2009	1	B	3	4.738	3.47	1.136	24.03	0.138	3.344	184	0.239764	0.0412679
2009	1	B	3	0.742	0.59	0.132	13.23	0.016	0.566	184	0.177898	0.0282686
2009	1	B	3	0.091			6.28	0.001		184	0
2009	1	B	3	0.139			7.99	0.001		184	0
2009	1	B	3	0.229			8.42	0.001		184	0
2009	1	B	3	0.152			7.67	0.001		184	0
2009	1	B	3	3.274	2.325	0.67	20.44	0.096	2.247	184	0.204643	0.0427236
2009	1	B	3	3.646	2.792	0.729	20.99	0.097	2.71	184	0.199945	0.0357934
2009	1	B	3	2.957	2.148	0.558	19.29	0.082	2.058	184	0.188705	0.0398445
2009	1	B	3	1.093	0.913	0.266	14.05	0.031	0.876	184	0.243367	0.0353881
2009	1	B	3	3.85	2.954	0.771	20.62	0.11	2.844	184	0.20026	0.0386779
2009	1	B	3	3.657	2.655	0.877	20.53	0.111	2.555	184	0.239814	0.0434442
2009	1	B	3	1.945	1.506	0.402	17.14	0.058	1.434	184	0.206684	0.0404463
2009	1	B	3	2.721	2.022	0.591	18.57	0.09	1.93	184	0.2172	0.0466321
2009	1	B	3	2.745	2.026	0.492	18.78	0.074	1.973	184	0.179235	0.0375063
2009	1	B	3	0.663	0.535	0.118	11.81	0.027	0.495	184	0.177979	0.0545455
2009	1	B	3	0.71	0.554	0.088	12.5	0.017	0.538	184	0.123944	0.0315985
2009	1	B	3	3.779	2.82	0.825	20.74	0.125	2.71	184	0.218312	0.0461255
2009	1	B	3	3.1	2.41	0.551	19.58	0.074	2.353	184	0.177742	0.0314492
2009	1	B	3	3.473	2.725	0.623	20.15	0.071	2.66	184	0.179384	0.0266917
2009	1	B	3	4.873	3.509	1.097	22.59	0.126	3.41	184	0.225118	0.0369501
2009	1	B	3	4.307	3.513	0.62	22.59	0.078	3.411	184	0.143952	0.0228672
2009	1	B	3	2.992	2.53	0.319	20.16	0.009	2.465	184	0.106618	0.00365112
2009	1	B	3	3.179	2.462	0.523	19.6	0.068	2.369	184	0.164517	0.0287041
2009	1	B	3	3.796	2.785	0.796	21.17	0.093	2.678	184	0.209694	0.0347274
2009	1	B	3	3.169	2.385	0.641	19.66	0.088	2.321	184	0.202272	0.0379147
2009	1	B	3	3.206	2.474	0.561	18.98	0.086	2.364	184	0.174984	0.036379
2009	1	B	3	1.916	1.349	0.392	17.35	0.046	1.305	184	0.204593	0.035249
2009	1	B	3	0.326			9.93	0.01		184	0
2009	1	B	3	1.252	1.005	0.194	14.7	0.015	0.94	184	0.154952	0.0159574
2009	1	B	3	0.222			8.94	0.01		184	0
2009	1	B	3	0.071			6.01	0.01		184	0
2009	1	B	3	0.028			4.9	0.01		184	0
2009	1	C	3	3.94	3.038	0.776	21.86	0.104	2.94	184	0.196954	0.0353741
2009	1	C	3	2.943	2.319	0.522	19.01	0.08	2.232	184	0.17737	0.0358423
2009	1	C	3	4.949	3.639	1.123	24.09	0.156	3.518	184	0.226915	0.0443434
2009	1	C	3	3.908	3.08	0.702	20.52	0.128	2.985	184	0.179632	0.0428811
2009	1	C	3	3.841	3.005	0.693	22.67	0.117	2.939	184	0.180422	0.0398095
2009	1	C	3	3.44	2.913	0.533	21.13	0.123	2.812	184	0.154942	0.0437411
2009	1	C	3	3.339	2.567	0.562	19.87	0.095	2.487	184	0.168314	0.0381986
2009	1	C	3	2.362	1.843	0.43	18.13	0.068	1.743	184	0.182049	0.0390132
2009	1	C	3	6.195	4.455	1.582	25.52	0.181	4.327	184	0.255367	0.0418304
2009	1	C	3	1.392	1.043	0.322	15.37	0.037	0.983	184	0.231322	0.0376399
2009	1	C	3	2.407	1.843	0.397	18.27	0.057	1.77	184	0.164936	0.0322034
2009	1	C	3	1.383	1.105	0.192	15.07	0.03	1.066	184	0.138829	0.0281426
2009	1	C	3	1.067	0.858	0.162	14.69	0.01	0.813	184	0.151828	0.0123001
2009	1	C	3	0.578	0.445	0.133	11.42	0.015	0.43	184	0.230104	0.0348837
2009	1	C	3	0.16			7.77	0.01		184	0
2009	1	C	3	3.016	2.545	0.471	19.87	0.072	2.101	184	0.156167	0.0342694
2009	1	C	3	2.876	2.347	0.529	20.27	0.092	2.115	184	0.183936	0.0434988
2009	1	C	3	3.442	2.747	0.695	20.86	0.089	2.239	184	0.201917	0.0397499
2009	1	C	3	2.589	2.159	0.43	18.21	0.06	1.955	184	0.166087	0.0306905
2009	1	C	3	2.695	2.133	0.562	18.7	0.072	1.951	184	0.208534	0.0369042
2009	1	C	3	3.482	2.948	0.534	21	0.074	2.638	184	0.15336	0.0280516
2009	1	C	3	1.714	1.437	0.277	16.8	0.039	1.277	184	0.16161	0.0305403
2009	1	C	3	0.36	0.087	0.273	14.59	0.035	0.22	184	0.758333	0.159091
2009	1	C	3	0.138			6.73	0.01		184	0
2009	1	C	3	0.046			4.36	0.01		184	0
2009	1	C	3	0.138			7.09	0.01		184	0
2009	1	C	3	0.588	0.45	0.101	11.36	0.021	0.438	184	0.171769	0.0479452
2009	1	C	3	0.027			3.81	0.01		184	0
2009	1	C	3	0.04			2.93	0.01		184	0
2009	1	C	3	0.384	0.321	0.034	10.55	0.005	0.311	184	0.0885417	0.0160772
2009	1	C	3	0.02			3.64	0.01		184	0
2009	1	C	3	0.26			9.51	0.01		184	0
2009	1	C	3	0.068			5.73	0.01		184	0
2009	1	C	3	2.632	2.128	0.353	17.81	0.04	2.072	184	0.134119	0.019305
2009	1	C	3	2.649	1.977	0.501	19.22	0.088	1.895	184	0.189128	0.046438
2009	1	C	3	0.794	0.671	0.104	13.23	0.007	0.643	184	0.130982	0.0108865
2009	1	C	3	1.177	0.945	0.201	15.35	0.026	0.908	184	0.170773	0.0286344
2009	1	C	3	0.458	0.365	0.075	10.77	0.015	0.355	184	0.163755	0.0422535
2009	1	C	3	0.024			3.8	0.01		184	0
2009	1	C	3	3.736	2.771	0.886	21.67	0.134	2.68	184	0.237152	0.05
2009	1	C	3	2.038	1.63	0.293	15.44	0.051	1.58	184	0.143768	0.0322785
2009	1	C	3	3.403	2.611	0.675	21.16	0.088	2.507	184	0.198354	0.0351017
2009	1	C	3	3.872	2.948	0.727	17.04	0.118	2.871	184	0.187758	0.0411007
2009	1	C	3	2.015	1.595	0.253	19.48	0.038	1.56	184	0.125558	0.024359
2009	1	C	3	2.776	2.23	0.456	18.74	0.065	2.148	184	0.164265	0.0302607
2009	1	C	3	2.52	2.049	0.379	22.09	0.07	1.993	184	0.150397	0.0351229
2009	1	C	3	0.916	6.737	0.111	13.23	0.02	0.715	184	0.121179	0.027972
2009	1	C	3	3.948	3.191	0.673	21.85	0.109	3.104	184	0.170466	0.035116
2009	1	C	3	6.006	4.31	1.433	24.72	0.159	4.106	184	0.238595	0.0387238
2009	1	C	3	4.097	3.089	0.799	22.3	0.12	2.988	184	0.195021	0.0401606
2009	1	C	3	3.399	2.476	0.706	21.34	0.097	2.414	184	0.207708	0.0401823
2009	1	C	3	4.013	2.953	0.845	21.12	0.116	2.891	184	0.210566	0.0401245
2009	1	C	3	5.021	3.972	0.905	22.13	0.15	3.822	184	0.180243	0.0392465
2009	1	C	3	5.361	3.906	1.192	23.47	0.15	3.748	184	0.222347	0.0400213
2009	1	C	3	5.529	3.908	1.41	24.76	0.188	3.698	184	0.255019	0.0508383
2009	1	C	3	1.762	1.412	0.247	15.81	0.043	1.354	184	0.140182	0.0317578
2009	1	C	3	0.042			4.67	0.001		184	0
2009	1	C	3	0.017			4.09	0.001		184	0
2009	1	C	3	0.035			4.92	0.001		184	0
2009	1	C	3	6.292	4.479	1.413	24.71	0.166	4.347	184	0.224571	0.0381873
2009	1	C	3	3.579	2.6	0.791	21.4	0.096	2.487	184	0.221011	0.0386007
2009	1	C	3	4.57	3.491	0.963	23.05	0.122	3.376	184	0.210722	0.0361374
2009	1	C	3	4.817	3.556	1.143	22.24	0.154	3.415	184	0.237285	0.0450952
2009	1	C	3	2.474	1.843	0.515	19.09	0.074	1.758	184	0.208165	0.0420933
2009	1	C	3	1.582	1.209	0.264	15.97	0.027	1.16	184	0.166877	0.0232759
2009	1	C	3	3.696	2.761	0.795	21.3	0.102	2.648	184	0.215097	0.0385196
2009	1	C	3	5.781	4.811	0.896	26.86	0.161	4.637	184	0.15499	0.0347207
2009	1	C	3	5.42	3.817	1.331	24.71	0.164	3.689	184	0.245572	0.0444565
2009	1	C	3	5.25	3.968	1.166	23.27	0.142	3.819	184	0.222095	0.0371825
2009	1	C	3	1.515	1.261	0.241	15.12	0.034	1.193	184	0.159076	0.0284996
2009	1	C	3	2.712	2.187	0.496	19.71	0.069	2.109	184	0.182891	0.0327169
2009	1	C	3	1.899	1.496	0.365	21.42	0.054	1.436	184	0.192206	0.0376045
2009	1	C	3	3.524	2.698	0.742	23.51	0.096	2.575	184	0.210556	0.0372816
2009	1	C	3	3.847	3.034	0.732	23.21	0.128	2.953	184	0.190278	0.0433458
2009	1	C	3	4.492	3.579	0.765	21.11	0.133	3.42	184	0.170303	0.0388889
2009	1	C	3	4.437	3.5	0.797	21.99	0.084	3.388	184	0.179626	0.0247934
2009	1	C	3	3.436	2.807	0.535	20.54	0.021	2.694	184	0.155704	0.0077951
2009	1	C	3	2.243	1.836	0.355	18.12	0.043	1.745	184	0.15827	0.0246418
2009	1	C	3	3.483	2.598	0.702	18.87	0.111	2.501	184	0.20155	0.0443822
2009	1	C	3	0.89	0.743	0.125	14.27	0.019	0.706	184	0.140449	0.0269122
2009	1	C	3	0.795	0.6	0.103	13.56	0.018	0.558	184	0.12956	0.0322581
2009	1	C	3	0.462	0.326	0.066	10.72	0.007	0.308	184	0.142857	0.0227273
2009	1	C	3	0.319			9.94	0.001		184	0
2009	1	C	3	0.055			5.19	0.001		184	0
2009	1	C	3	0.029			5.1	0.001		184	0
2009	1	C	3	5.068	3.658	1.149	23.94	0.161	3.533	184	0.226717	0.0455703
2009	1	C	3	2.432	1.785	0.522	19.19	0.083	1.72	184	0.214638	0.0482558
2009	1	C	3	6.688	4.834	1.644	25.25	1.154	4.631	184	0.245813	0.24919
2009	1	C	3	4.473	3.261	0.912	22	0.119	3.147	184	0.20389	0.0378138
2009	1	C	3	3.783	2.839	0.672	21.79	0.106	2.712	184	0.177637	0.0390855
2009	1	C	3	0.414	0.293	0.059	10.36	0.016	0.286	184	0.142512	0.0559441
2009	1	C	3	0.022		0	4.37	0.001		184	0
2009	1	A	4	2.085	1.898	0.147	17.81	0.05	1.849	317.4	0.0705036	0.0270416
2009	1	A	4	3.234	2.764	0.366	20.44	0.076	2.693	317.4	0.113173	0.0282213
2009	1	A	4	2.993	2.649	0.252	20.28	0.066	2.504	317.4	0.0841965	0.0263578
2009	1	A	4	3.064	2.241	0.651	19.54	0.098	2.153	317.4	0.212467	0.0455179
2009	1	A	4	2.072	1.756	0.269	19.45	0.08	1.74	317.4	0.129826	0.045977
2009	1	A	4	2.067	1.734	0.252	17.1	0.053	1.652	317.4	0.121916	0.0320823
2009	1	A	4	0.232			9.29	0.001		317.4	0
2009	1	A	4	0.152			8.12	0.001		317.4	0
2009	1	A	4	0.115			6.94	0.001		317.4	0
2009	1	A	4	0.11			6.52	0.001		317.4	0
2009	1	A	4	0.064			5.71	0.001		317.4	0
2009	1	A	4	0.034			4.5	0.001		317.4	0
2009	1	A	4	1.915	1.442	0.315	16.64	0.045	1.382	317.4	0.164491	0.0325615
2009	1	A	4	4.727	3.508	1.015	23.04	0.092	3.31	317.4	0.214724	0.0277946
2009	1	A	4	2.817	2.163	0.543	19.07	0.057	2.059	317.4	0.192758	0.0276833
2009	1	A	4	3.591	2.667	0.809	20.69	0.089	2.534	317.4	0.225285	0.0351223
2009	1	A	4	2.204	1.71	0.369	17.46	0.046	1.637	317.4	0.167423	0.0281002
2009	1	A	4	4.204	3.072	0.963	21.7	0.125	2.962	317.4	0.229068	0.0422012
2009	1	A	4	3.037	2.342	0.559	19.58	0.082	2.26	317.4	0.184063	0.0362832
2009	1	A	4	4.698	2.871	0.634	21.08	0.093	2.801	317.4	0.134951	0.0332024
2009	1	A	4	3.078	2.329	0.611	18.57	0.089	2.297	317.4	0.198506	0.0387462
2009	1	A	4	0.418	0.349	0.037	11.08	0.026	0.343	317.4	0.0885167	0.0758017
2009	1	A	4	0.906	0.732	0.101	13.37	0.031	0.701	317.4	0.111479	0.0442225
2009	1	A	4	0.146			7.51	0.001		317.4	0
2009	1	A	4	0.029			4.52	0.001		317.4	0
2009	1	A	4	2.49	2.131	0.356	20.06	0.075	2.346	317.4	0.142972	0.0319693
2009	1	A	4	2.716	2.286	0.389	18.6	0.059	2.127	317.4	0.143225	0.0277386
2009	1	A	4	1.692	1.388	0.283	16.98	0.054	1.352	317.4	0.167258	0.0399408
2009	1	A	4	2.254	1.892	0.214	17.13	0.055	1.857	317.4	0.0949423	0.0296177
2009	1	A	4	3.538	2.656	0.53	21.76	0.088	2.579	317.4	0.149802	0.0341218
2009	1	A	4	2.43	1.922	0.297	18.36	0.173	1.871	317.4	0.122222	0.0924639
2009	1	A	4	0.725	0.619	0.055	12.33	0.025	0.594	317.4	0.0758621	0.0420875
2009	1	A	4	2.778	2.434	0.286	19.97	0.062	2.369	317.4	0.102952	0.0261714
2009	1	A	4	2.457	1.96	0.351	19.81	0.06	1.86	317.4	0.142857	0.0322581
2009	1	A	4	1.873	1.506	0.244	17.87	0.03	1.431	317.4	0.130272	0.0209644
2009	1	A	4	3.932	2.891	0.772	20.65	0.079	2.759	317.4	0.196338	0.0286336
2009	1	A	4	3.563	2.564	0.714	22.13	0.088	2.433	317.4	0.200393	0.0361693
2009	1	A	4	2.03	1.726	0.257	19.18	0.053	1.683	317.4	0.126601	0.0314914
2009	1	A	4	3.182	2.601	0.455	21.14	0.075	2.515	317.4	0.142992	0.0298211
2009	1	A	4	1.81	1.597	0.154	17	0.025	1.56	317.4	0.0850829	0.0160256
2009	1	A	4	0.275			9.86	0.001		317.4	0
2009	1	A	4	0.135			7.69	0.001		317.4	0
2009	1	A	4	0.206			8.79	0.001		317.4	0
2009	1	A	4	0.164			7.58	0.001		317.4	0
2009	1	A	4	0.151			8.2	0.001		317.4	0
2009	1	A	4	0.09			6.71	0.001		317.4	0
2009	1	A	4	0.061			5.33	0.001		317.4	0
2009	1	A	4	0.106			7.07	0.001		317.4	0
2009	1	A	4	0.057			5.74	0.001		317.4	0
2009	1	A	4	0.073			5.68	0.001		317.4	0
2009	1	A	4	0.08			6.25	0.001		317.4	0
2009	1	A	4	3.125	2.663	0.332	21.43	0.057	2.595	317.4	0.10624	0.0219653
2009	1	A	4	3.678	2.941	0.527	22.78	0.09	2.838	317.4	0.143284	0.0317125
2009	1	A	4	2.868	2.273	0.432	20.54	0.05	2.23	317.4	0.150628	0.0224215
2009	1	A	4	3.278	2.836	0.368	21.45	0.076	2.795	317.4	0.112264	0.0271914
2009	1	A	4	0.112			6.9	0.001		317.4	0
2009	1	A	4	0.119			6.87	0.001		317.4	0
2009	1	A	4	0.064			5.59	0.001		317.4	0
2009	1	A	4	4.204	3.198	0.296	21.58	0.067	3.075	317.4	0.0704091	0.0217886
2009	1	A	4	3.151	2.886	0.223	22.9	0.054	2.851	317.4	0.0707712	0.0189407
2009	1	A	4	4.869	3.438	1.177	25.05	0.073	3.334	317.4	0.241733	0.0218956
2009	1	A	4	1.486	1.161	0.226	15.08	0.032	1.097	317.4	0.152086	0.0291705
2009	1	A	4	3.606	2.712	0.547	21.5	0.08	2.682	317.4	0.151692	0.0298285
2009	1	A	4	2.768	1.914	0.35	20.53	0.035	1.859	317.4	0.126445	0.0188273
2009	1	A	4	4.03	2.964	0.752	22.6	0.069	2.892	317.4	0.1866	0.0238589
2009	1	A	4	2.714	2.099	10.474	19.83	0.057	2.008	317.4	3.85925	0.0283865
2009	1	A	4	3.524	2.544	0.543	20.07	0.071	24.321	317.4	0.154086	0.00291929
2009	1	A	4	4.19	3.249	0.7	23	0.105	3.099	317.4	0.167064	0.0338819
2009	1	A	4	0.262			9.25	0.001		317.4	0
2009	1	A	4	0.312			9.17	0.001		317.4	0
2009	1	A	4	4.904	3.583	1.166	23.68	0.109	3.453	317.4	0.237765	0.0315668
2009	1	A	4	3.262	2.497	0.672	19.22	0.076	2.347	317.4	0.206009	0.0323818
2009	1	A	4	2.277	1.724	0.607	17.49	0.061	1.646	317.4	0.266579	0.0370595
2009	1	A	4	3.515	2.774	0.674	21.38	0.087	2.678	317.4	0.19175	0.0324869
2009	1	A	4	2.909	2.177	0.661	19.73	0.055	2.074	317.4	0.227226	0.0265188
2009	1	A	4	4.488	3.24	1.105	23.73	0.117	3.085	317.4	0.246212	0.0379254
2009	1	A	4	3.235	2.557	0.623	19.15	0.075	2.435	317.4	0.192581	0.0308008
2009	1	A	4	3.651	2.604	0.904	21.89	0.103	2.492	317.4	0.247603	0.0413323
2009	1	A	4	4.151	2.967	1.086	22.4	0.106	2.828	317.4	0.261624	0.0374823
2009	1	A	4	4.29	3.891	0.353	24.4	0.071	3.842	317.4	0.0822844	0.01848
2009	1	B	4	2.614	2.292	0.302	19.62	0.07	2.185	317.4	0.115532	0.0320366
2009	1	B	4	2.733	2.406	0.312	21.14	0.067	2.29	317.4	0.11416	0.0292576
2009	1	B	4	1.788	1.561	0.197	17.16	0.053	1.508	317.4	0.110179	0.0351459
2009	1	B	4	3.999	3.427	0.538	23.35	0.081	3.314	317.4	0.134534	0.0244418
2009	1	B	4	3.306	2.566	0.643	21.05	0.083	2.403	317.4	0.194495	0.0345402
2009	1	B	4	4.098	3.608	0.481	23.31	0.087	3.47	317.4	0.117374	0.025072
2009	1	B	4	2.922	2.511	0.387	22.18	0.074	2.459	317.4	0.132444	0.0300935
2009	1	B	4	2.621	2.117	0.442	19.09	0.073	2.028	317.4	0.168638	0.0359961
2009	1	B	4	2.59	2.293	0.285	19.78	0.069	2.239	317.4	0.110039	0.0308173
2009	1	B	4	2.524	2.264	0.254	22.16	0.069	2.204	317.4	0.100634	0.0313067
2009	1	B	4	2.635	2.112	0.428	18.7	0.05	1.967	317.4	0.162429	0.0254194
2009	1	B	4	1.108	0.941	0.131	15.31	0.039	0.882	317.4	0.118231	0.0442177
2009	1	B	4	1.063	0.862	0.141	13.95	0.018	0.818	317.4	0.132643	0.0220049
2009	1	B	4	0.939	0.797	0.105	13.23	0.026	0.741	317.4	0.111821	0.0350877
2009	1	B	4	0.449	0.449	0.017	10.99	0.02	0.387	317.4	0.0378619	0.0516796
2009	1	B	4	0.429	0.429	0.049	10.59	0.005	0.315	317.4	0.114219	0.015873
2009	1	B	4	0.33			9.62	0.01		317.4	0
2009	1	B	4	0.1			6.49	0.01		317.4	0
2009	1	B	4	0.33			9.95	0.01		317.4	0
2009	1	B	4	0.868	0.694	0.098	13.09	0.014	0.657	317.4	0.112903	0.021309
2009	1	B	4	0.557	0.5	0.048	12.11	0.011	0.492	317.4	0.0861759	0.0223577
2009	1	B	4	0.742	0.611	0.09	12.69	0.019	0.601	317.4	0.121294	0.031614
2009	1	B	4	0.361			9.98	0.01		317.4	0
2009	1	B	4	0.462	0.36	0.06	10.92	0.016	0.349	317.4	0.12987	0.0458453
2009	1	B	4	0.734	0.609	0.085	12.73	0.01	0.576	317.4	0.115804	0.0173611
2009	1	B	4	0.397	0.349	0.046	10.81	0.012	0.331	317.4	0.115869	0.0362538
2009	1	B	4	0.276	0.276		9.27	0.01		317.4	0
2009	1	B	4	0.341	0.341		9.75	0.01		317.4	0
2009	1	B	4	0.15	0.15		7.45	0.01		317.4	0
2009	1	B	4	0.113	0.113		6.57	0.01		317.4	0
2009	1	B	4	2.467	1.914	0.453	17.82	0.062	1.862	317.4	0.183624	0.0332975
2009	1	B	4	3.39	2.768	0.537	20.94	0.098	2.645	317.4	0.158407	0.037051
2009	1	B	4	3.607	3.088	0.469	21.01	0.09	3.003	317.4	0.130025	0.02997
2009	1	B	4	3.016	2.632	0.338	19.68	0.062	2.565	317.4	0.112069	0.0241715
2009	1	B	4	3.492	2.911	0.493	21.27	0.078	2.834	317.4	0.14118	0.0275229
2009	1	B	4	1.731	1.614	0.101	16.36	0.02	1.567	317.4	0.0583478	0.0127632
2009	1	B	4	3.431	2.866	0.519	21.75	0.106	2.808	317.4	0.151268	0.0377493
2009	1	B	4	2.687	2.392	0.241	19.29	0.051	2.304	317.4	0.0896911	0.0221354
2009	1	B	4	3.129	2.462	0.55	20.23	0.077	2.399	317.4	0.175775	0.0320967
2009	1	B	4	1.273	1.055	0.176	14.66	0.02	1.005	317.4	0.138256	0.0199005
2009	1	B	4	2.449	2.047	0.36	19.09	0.023	1.997	317.4	0.146999	0.0115173
2009	1	B	4	2.445	2.139	0.259	21.55	0.055	2.066	317.4	0.10593	0.0266215
2009	1	B	4	2.203	1.962	0.197	18.02	0.048	1.898	317.4	0.0894235	0.0252898
2009	1	B	4	0.332	0.295	0.039	9.78	0.01	0.282	317.4	0.11747	0.035461
2009	1	B	4	2.902	2.351	0.363	19.4	0.024	2.302	317.4	0.125086	0.0104257
2009	1	B	4	3.391	2.952	0.343	20.83	0.096	2.853	317.4	0.10115	0.0336488
2009	1	B	4	3.894	3.017	0.746	22.47	0.163	2.962	317.4	0.191577	0.0550304
2009	1	B	4	3.667	3.03	0.54	21.79	0.082	2.915	317.4	0.147259	0.0281304
2009	1	B	4	2.289	2.006	0.263	18.62	0.06	1.948	317.4	0.114897	0.0308008
2009	1	B	4	2.365	2.014	0.273	20.72	0.064	1.953	317.4	0.115433	0.0327701
2009	1	B	4	2.745	2.461	0.202	19.24	0.047	2.4	317.4	0.0735883	0.0195833
2009	1	B	4	0.082	0.082		6.79	0.01		317.4	0
2009	1	B	4	0.043	0.043		5.63	0.01		317.4	0
2009	1	B	4	0.068	0.068		6.21	0.01		317.4	0
2009	1	B	4	0.079	0.079		6.24	0.01		317.4	0
2009	1	B	4	1.857	1.47	0.223	16.73	0.042	1.452	317.4	0.120086	0.0289256
2009	1	B	4	2.249	1.813	0.303	15.86	0.055	1.756	317.4	0.134727	0.0313212
2009	1	B	4	3.896	2.951	0.651	20.85	0.09	2.835	317.4	0.167094	0.031746
2009	1	B	4	0.947	0.727	0.154	13.3	0.029	0.697	317.4	0.162619	0.0416069
2009	1	B	4	0.112			6.9	0.01		317.4	0
2009	1	B	4	1.034	0.905	0.076	14.12	0.005	0.878	317.4	0.073501	0.00569476
2009	1	B	4	2.486	2.147	0.254	20.34	0.068	2.103	317.4	0.102172	0.0323348
2009	1	B	4	0.563	0.486	0.043	11.61	0.01	0.458	317.4	0.0763766	0.0218341
2009	1	B	4	0.878	0.723	0.069	12.44	0.005	0.704	317.4	0.0785877	0.00710227
2009	1	B	4	0.677	0.574	0.058	12.36	0.013	0.182	317.4	0.0856721	0.0714286
2009	1	B	4	0.318			9.91	0.01		317.4	0
2009	1	B	4	0.112			6.85	0.01		317.4	0
2009	1	B	4	0.672	0.621	0.055	13.01	0.023	0.614	317.4	0.0818452	0.0374593
2009	1	B	4	0.899	0.712	0.123	13.27	0.026	0.681	317.4	0.136819	0.0381791
2009	1	B	4	0.883	0.691	0.12	13.78	0.019	0.667	317.4	0.1359	0.0284858
2009	1	B	4	0.759	0.584	0.104	12.22	0.027	0.574	317.4	0.137022	0.0470383
2009	1	B	4	0.66	0.62	0.03	13.24	0.01	0.605	317.4	0.0454545	0.0165289
2009	1	B	4	2.192	1.923	0.247	18.98	0.074	1.884	317.4	0.112682	0.0392781
2009	1	B	4	3.05	2.717	0.281	20.56	0.088	2.691	317.4	0.0921311	0.0327016
2009	1	B	4	0.754	0.634	0.078	12.41	0.01	0.597	317.4	0.103448	0.0167504
2009	1	B	4	0.972	0.819	0.125	13.54	0.008	0.767	317.4	0.128601	0.0104302
2009	1	B	4	0.718	0.587	0.069	12.49	0.008	0.554	317.4	0.0961003	0.0144404
2009	1	B	4	0.435	0.39	0.033	10.69	0.01	0.37	317.4	0.0758621	0.027027
2009	1	B	4	0.284			9.53	0.01		317.4	0
2009	1	B	4	0.142			7.38	0.01		317.4	0
2009	1	B	4	0.101			6.46	0.01		317.4	0
2009	1	B	4	0.03			4.33	0.01		317.4	0
2009	1	B	4	2.441	1.845	0.373	17.81	0.06	1.792	317.4	0.152806	0.0334821
2009	1	B	4	3.307	2.525	0.511	20.97	0.097	2.464	317.4	0.154521	0.0393669
2009	1	B	4	3.433	2.618	0.561	20.85	0.103	2.549	317.4	0.163414	0.040408
2009	1	B	4	4.344	3.325	0.774	21.7	0.059	3.267	317.4	0.178177	0.0180594
2009	1	B	4	3.209	2.434	0.562	19.93	0.098	2.373	317.4	0.175132	0.0412979
2009	1	B	4	4.32	3.579	0.544	23.05	0.124	3.526	317.4	0.125926	0.0351673
2009	1	B	4	2.241	1.749	0.301	17.98	0.063	1.7	317.4	0.134315	0.0370588
2009	1	B	4	3.95	2.945	0.631	21.21	0.103	2.895	317.4	0.159747	0.0355786
2009	1	B	4	1.374	1.112	0.151	15.35	0.033	1.064	317.4	0.109898	0.031015
2009	1	B	4	0.494	0.39	0.043	10.56	0.02	0.374	317.4	0.0870445	0.0534759
2009	1	B	4	0.198			8.25	0.01		317.4	0
2009	1	B	4	0.074			6.16	0.01		317.4	0
2009	1	B	4	3.684	2.806	0.765	20.65	0.088	2.716	317.4	0.207655	0.0324006
2009	1	B	4	3.343	2.409	0.777	20.4	0.087	2.347	317.4	0.232426	0.0370686
2009	1	B	4	3.576	2.662	0.679	20.33	0.096	2.562	317.4	0.189877	0.0374707
2009	1	B	4	4.07	3.134	0.745	23.22	0.115	3.054	317.4	0.183047	0.0376555
2009	1	B	4	3.197	2.381	0.479	19.82	0.078	2.287	317.4	0.149828	0.0341058
2009	1	B	4	3.108	2.491	0.583	19.39	0.089	2.403	317.4	0.18758	0.037037
2009	1	B	4	4.132	3.366	0.638	21.49	0.078	3.271	317.4	0.154405	0.0238459
2009	1	B	4	3.334	2.708	0.512	20.3	0.092	2.59	317.4	0.153569	0.0355212
2009	1	B	4	4.148	2.933	0.98	22.86	0.114	2.812	317.4	0.236258	0.0405405
2009	1	B	4	3.912	3.247	0.584	21.39	0.109	3.118	317.4	0.149284	0.0349583
2009	1	B	4	3.875	2.795	0.731	21.98	0.103	2.678	317.4	0.188645	0.0384615
2009	1	B	4	2.01	1.627	0.317	17.27	0.061	1.523	317.4	0.157711	0.0400525
2009	1	B	4	4.115	3.409	0.588	22.28	0.094	3.272	317.4	0.142892	0.0287286
2009	1	B	4	3.08	2.442	0.466	20.83	0.079	2.357	317.4	0.151299	0.0335172
2009	1	B	4	3.005	2.368	0.493	19.62	0.071	2.304	317.4	0.16406	0.030816
2009	1	B	4	6.551	5.141	1.152	26.69	0.182	4.967	317.4	0.175851	0.0366418
2009	1	B	4	3.83	3.119	0.536	21.48	0.084	3.026	317.4	0.139948	0.0277594
2009	1	B	4	2.987	2.344	0.48	19.64	0.081	2.241	317.4	0.160696	0.0361446
2009	1	B	4	2.729	1.993	0.605	19.24	0.065	1.923	317.4	0.221693	0.0338014
2009	1	B	4	3.735	2.78	0.668	21.41	0.096	2.713	317.4	0.178849	0.0353852
2009	1	B	4	2.721	2.053	0.398	19.33	0.072	1.984	317.4	0.14627	0.0362903
2009	1	B	4	0.62	0.477	0.075	11.39	0.02	0.455	317.4	0.120968	0.043956
2009	1	B	4	0.783	0.623	0.099	12.01	0.015	0.598	317.4	0.126437	0.0250836
2009	1	B	4	0.921	0.775	0.071	13.4	0.031	0.726	317.4	0.0770901	0.0426997
2009	1	B	4	4.029	3.001	0.631	22.13	0.082	2.859	317.4	0.156615	0.0286814
2009	1	B	4	4.162	3.217	0.321	21	0.085	0.531	317.4	0.0771264	0.160075
2009	1	B	4	1.743	1.37	0.316	15.52	0.038	1.309	317.4	0.181297	0.0290298
2009	1	B	4	3.232	2.527	0.612	19.64	0.073	2.382	317.4	0.189356	0.0306465
2009	1	B	4	0.973	0.758	0.173	13.67	0.026	0.706	317.4	0.177801	0.0368272
2009	1	B	4	0.923	0.735	0.103	12.97	0.01	0.704	317.4	0.111593	0.0142045
2009	1	B	4	0.982	0.756	0.183	13.34	0.088	0.72	317.4	0.186354	0.122222
2009	1	B	4	1.066	0.845	0.155	14.25	0.014	0.81	317.4	0.145403	0.017284
2009	1	B	4	0.688	0.573	0.072	12.67	0.012	0.555	317.4	0.104651	0.0216216
2009	1	B	4	0.305			9.25	0.01		317.4	0
2009	1	B	4	0.208			8.4	0.01		317.4	0
2009	1	B	4	0.182			7.52	0.01		317.4	0
2009	1	B	4	0.104			6.44	0.01		317.4	0
2009	1	C	4	0.381			9.8	0.01		317.4	0
2009	1	C	4	0.075			5.59	0.01		317.4	0
2009	1	C	4	2.96	2.367	0.446	19.77	0.074	2.287	317.4	0.150676	0.0323568
2009	1	C	4	3.018	2.67	0.332	21.08	0.078	2.604	317.4	0.110007	0.0299539
2009	1	C	4	3.453	2.737	0.583	20.99	0.002	2.609	317.4	0.168839	0.000766577
2009	1	C	4	3.076	2.546	0.423	19.76	0.054	2.406	317.4	0.137516	0.0224439
2009	1	C	4	5.931	4.693	0.975	25.81	0.21	4.459	317.4	0.16439	0.0470958
2009	1	C	4	3.579	2.866	0.603	22.54	0.085	2.752	317.4	0.168483	0.0308866
2009	1	C	4	2.568	1.963	0.497	19.08	0.057	1.889	317.4	0.193536	0.0301747
2009	1	C	4	3.496	2.974	0.387	20.51	0.069	2.823	317.4	0.110698	0.0244421
2009	1	C	4	4.528	3.515	0.902	21.68	0.107	3.403	317.4	0.199205	0.0314428
2009	1	C	4	5.206	4.02	0.981	22.41	0.174	3.868	317.4	0.188436	0.0449845
2009	1	C	4	1.862	1.413	0.317	16.52	0.089	1.549	317.4	0.170247	0.0574564
2009	1	C	4	3.052	2.457	0.486	20.11	0.074	2.383	317.4	0.15924	0.0310533
2009	1	C	4	2.9	2.506	0.356	19.83	0.08	2.436	317.4	0.122759	0.0328407
2009	1	C	4	1.421	1.132	0.177	15.95	0.07	1.073	317.4	0.12456	0.0652377
2009	1	C	4	3.88	3.062	0.526	21.49	0.085	2.92	317.4	0.135567	0.0291096
2009	1	C	4	3.648	2.908	0.596	21.67	0.102	2.821	317.4	0.163377	0.0361574
2009	1	C	4	0.613	0.542	0.063	12.05	0.024	0.525	317.4	0.102773	0.0457143
2009	1	C	4	0.782	0.622	0.106	12.95	0.018	0.581	317.4	0.13555	0.0309811
2009	1	C	4	0.101			6.32	0.01		317.4	0
2009	1	C	4	0.075			6.03	0.01		317.4	0
2009	1	C	4	2.108	1.613	0.332	17.71	0.048	1.567	317.4	0.157495	0.0306318
2009	1	C	4	4.293	3.222	0.853	23.05	0.131	3.087	317.4	0.198696	0.042436
2009	1	C	4	3.021	2.159	0.67	20.82	0.077	2.09	317.4	0.221781	0.0368421
2009	1	C	4	3.409	2.598	0.543	20.03	0.081	2.509	317.4	0.159284	0.0322838
2009	1	C	4	2.857	2.526	0.305	19.86	0.077	2.436	317.4	0.106755	0.0316092
2009	1	C	4	3.618	3.342	0.261	19.63	0.064	2.256	317.4	0.0721393	0.0283688
2009	1	C	4	2.908	2.489	0.369	19.38	0.077	2.373	317.4	0.126891	0.0324484
2009	1	C	4	1.897	1.705	0.175	17.14	0.04	1.645	317.4	0.0922509	0.0243161
2009	1	C	4	2.591	2.263	0.287	20.02	0.068	2.204	317.4	0.110768	0.030853
2009	1	C	4	3.774	2.849	0.643	21.68	0.094	2.731	317.4	0.170376	0.0344196
2009	1	C	4	4.077	3.407	0.617	22.11	0.115	2.274	317.4	0.151337	0.0505717
2009	1	C	4	0.126			7.14	0.01		317.4	0
2009	1	C	4	0.283			9.52	0.01		317.4	0
2009	1	C	4	0.159			7.5	0.01		317.4	0
2009	1	C	4	1.123	1.055	0.037	14.69	0.04	1.019	317.4	0.0329475	0.0392542
2009	1	C	4	2.158	1.796	0.24	16.42	0.012	1.742	317.4	0.111214	0.00688863
2009	1	C	4	6.03	4.517	1.127	25.6	0.179	4.362	317.4	0.186899	0.0410362
2009	1	C	4	0.236			8.72	0.01		317.4	0
2009	1	C	4	0.389			9.84	0.01		317.4	0
2009	1	C	4	2.164	1.699	0.357	17.08	0.049	1.649	317.4	0.164972	0.029715
2009	1	C	4	4.193	3.715	0.379	22.82	0.081	3.758	317.4	0.0903887	0.021554
2009	1	C	4	4.892	3.715	1.084	23.03	0.148	3.488	317.4	0.221586	0.0424312
2009	1	C	4	4.256	3.435	0.64	24.29	0.105	3.292	317.4	0.150376	0.0318955
2009	1	C	4	2.576	1.919	0.421	17.88	0.043	1.823	317.4	0.163432	0.0235875
2009	1	C	4	4.454	3.568	0.813	24.47	0.123	3.449	317.4	0.182533	0.0356625
2009	1	C	4	4.668	3.677	0.922	24.04	0.235	3.554	317.4	0.197515	0.0661227
2009	1	C	4	6.519	4.934	1.474	25.91	0.156	4.774	317.4	0.226108	0.032677
2009	1	C	4	3.543	3.044	0.419	21.11	0.066	2.947	317.4	0.118261	0.0223957
2009	1	C	4	0.273			9.15	0.01		317.4	0
2009	1	C	4	4.674	3.621	0.759	22.68	0.132	3.505	317.4	0.162388	0.0376605
2009	1	C	4	0.245			10.06	0.01		317.4	0
2009	1	C	4	1.624	1.318	0.156	16.72	0.01	1.277	317.4	0.0960591	0.00783085
2009	1	C	4	2.211	1.932	0.241	18.58	0.062	1.907	317.4	0.109	0.0325118
2009	1	C	4	2.862	2.377	0.396	21.58	0.063	2.311	317.4	0.138365	0.0272609
2009	1	C	4	3.472	2.914	0.424	22.66	0.044	2.848	317.4	0.12212	0.0154494
2009	1	C	4	1.874	1.688	0.153	17.16	0.028	1.64	317.4	0.0816435	0.0170732
2009	1	C	4	3.178	2.756	0.366	21.22	0.092	2.717	317.4	0.115167	0.0338609
2009	1	C	4	4.196	3.582	0.516	23.95	0.141	3.511	317.4	0.122974	0.0401595
2009	1	C	4	0.218			9	0.01		317.4	0
2009	1	C	4	0.317			9.98	0.01		317.4	0
2009	1	C	4	0.202			8.45	0.01		317.4	0
2009	1	C	4	0.166			7.8	0.01		317.4	0
2009	1	C	4	0.31			9.43	0.01		317.4	0
2009	1	C	4	0.233			9.16	0.01		317.4	0
2009	1	C	4	0.22			8.65	0.01		317.4	0
2009	1	C	4	0.174			7.97	0.01		317.4	0
2009	1	C	4	0.027			4.49	0.01		317.4	0
2009	1	C	4	0.198			8.76	0.01		317.4	0
2009	1	C	4	0.274			9.01	0.01		317.4	0
2009	1	C	4	0.346			9.79	0.01		317.4	0
2009	1	C	4	0.167			7.77	0.01		317.4	0
2009	1	C	4	0.38	0.306	0.034	10.68	0.01	0.294	317.4	0.0894737	0.0340136
2009	1	C	4	0.441	0.354	0.036	10.52	0.023	0.336	317.4	0.0816327	0.0684524
2009	1	C	4	0.868	0.692	0.058	13.51	0.012	0.675	317.4	0.0668203	0.0177778
2009	1	C	4	1.73	1.477	0.175	16.83	0.047	1.448	317.4	0.101156	0.0324586
2009	1	C	4	0.331	0.313	0.011	10.63	0.01	0.302	317.4	0.0332326	0.0331126
2009	1	A	5	2.7	2.046	0.553	18.26	0.066	1.941	418.2	0.204815	0.0340031
2009	1	A	5	0.564	0.442	0.117	11.47	0.022	0.407	418.2	0.207447	0.0540541
2009	1	A	5	0.822	0.66	0.092	13.18	0.016	0.635	418.2	0.111922	0.0251969
2009	1	A	5	2.174	1.7	0.267	17.19	0.035	1.643	418.2	0.122815	0.0213025
2009	1	A	5	0.762	0.677	0.065	13.1	0.012	0.653	418.2	0.0853018	0.0183767
2009	1	A	5	2.557	2.165	0.329	19.55	0.063	2.117	418.2	0.128666	0.0297591
2009	1	A	5	3.725	3.209	0.438	22.99	0.069	3.143	418.2	0.117584	0.0219535
2009	1	A	5	3.708	3.193	0.43	20.59	0.063	3.097	418.2	0.115965	0.0203423
2009	1	A	5	3.208	2.76	0.397	21.59	0.067	2.669	418.2	0.123753	0.025103
2009	1	A	5	3.519	2.872	0.535	22.94	0.059	2.709	418.2	0.152032	0.0217793
2009	1	A	5	3.11	2.639	0.424	22.23	0.082	2.543	418.2	0.136334	0.0322454
2009	1	A	5	3.067	2.575	0.438	20.46	0.049	2.408	418.2	0.142811	0.0203488
2009	1	A	5	3.526	2.999	0.468	23.16	0.082	2.936	418.2	0.132728	0.0279292
2009	1	A	5	2.553	2.136	0.313	18.43	0.039	2.054	418.2	0.122601	0.0189873
2009	1	A	5	3.041	2.646	0.306	19.68	0.059	2.572	418.2	0.100625	0.0229393
2009	1	A	5	2.591	2.122	0.355	17.45	0.044	2.037	418.2	0.137013	0.0216004
2009	1	A	5	2.332	1.981	0.298	19.31	0.034	1.901	418.2	0.127787	0.0178853
2009	1	A	5	3.513	2.969	0.485	22.81	0.052	2.863	418.2	0.138059	0.0181628
2009	1	A	5	2.002	1.697	0.239	17.2	0.049	1.642	418.2	0.119381	0.0298417
2009	1	A	5	3.993	3.469	0.455	23.33	0.099	3.335	418.2	0.113949	0.0296852
2009	1	A	5	3.322	2.849	0.383	21.8	0.077	2.775	418.2	0.115292	0.0277477
2009	1	A	5	2.815	2.411	0.295	20.33	0.038	2.357	418.2	0.104796	0.0161222
2009	1	A	5	3.539	3.092	0.373	20.76	0.057	3.026	418.2	0.105397	0.0188367
2009	1	A	5	2.084	1.524	0.363	18.36	0.054	1.454	418.2	0.174184	0.0371389
2009	1	A	5	3.216	2.39	0.507	20.69	0.056	2.329	418.2	0.157649	0.0240447
2009	1	A	5	3.498	2.91	0.501	23.09	0.067	2.855	418.2	0.143225	0.0234676
2009	1	A	5	4.772	3.763	0.863	23.79	0.118	3.667	418.2	0.180847	0.0321789
2009	1	A	5	4.495	3.522	0.236	21.47	0.123	3.356	418.2	0.0525028	0.0366508
2009	1	A	5	6.745	5.212	1.265	24.86	0.168	5.05	418.2	0.187546	0.0332673
2009	1	A	5	5.184	3.771	1.219	23.55	0.127	3.585	418.2	0.235147	0.0354254
2009	1	A	5	0.526	0.403	0.056	10.96	0.01	0.396	418.2	0.106464	0.0252525
2009	1	A	5	3.395	2.558	0.657	20.37	0.063	2.445	418.2	0.19352	0.0257669
2009	1	A	5	3.683	3.17	0.405	22.46	0.058	3.086	418.2	0.109965	0.0187946
2009	1	A	5	3.968	3.3	0.495	21.05	0.072	3.191	418.2	0.124748	0.0225635
2009	1	A	5	3.22	2.375	0.736	20.61	0.065	2.278	418.2	0.228571	0.0285338
2009	1	A	5	2.731	2.096	0.467	18.81	0.069	2.029	418.2	0.171	0.0340069
2009	1	B	5	1.869	1.387	0.228	17.5	0.049	1.356	418.2	0.12199	0.0361357
2009	1	B	5	3.842	2.836	0.741	17.4	0.04	2.703	418.2	0.192868	0.0147984
2009	1	B	5	3.214	2.527	0.386	19.57	0.06	2.42	418.2	0.1201	0.0247934
2009	1	B	5	0.176			7.85	0.01		418.2	0
2009	1	B	5	2.22	1.711	0.411	16.92	0.042	1.666	418.2	0.185135	0.0252101
2009	1	B	5	0.714	0.542	0.093	12.64	0.02	0.519	418.2	0.130252	0.0385356
2009	1	B	5	1.871	1.49		16.88	0.031	1.405	418.2	0	0.0220641
2009	1	B	5	3.761	2.766	0.791	22.52	0.088	2.675	418.2	0.210316	0.0328972
2009	1	B	5	6.432	4.778	1.281	24.32	0.162	4.688	418.2	0.19916	0.0345563
2009	1	B	5	3.747	2.906	0.692	20.97	0.076	2.825	418.2	0.184681	0.0269027
2009	1	B	5	5.486	4.148	1.112	23.6	0.121	4.039	418.2	0.202698	0.0299579
2009	1	B	5	0.234			9.1	0.01		418.2	0
2009	1	B	5	0.231			8.76	0.01		418.2	0
2009	1	B	5	0.149			7.72	0.01		418.2	0
2009	1	B	5	0.075			6.12	0.01		418.2	0
2009	1	B	5	0.045			5.42	0.01		418.2	0
2009	1	B	5	0.887	0.741	0.094	13.13	0.009	0.718	418.2	0.105975	0.0125348
2009	1	B	5	1.517	1.358	0.137	15.53	0.031	1.312	418.2	0.0903098	0.023628
2009	1	B	5	0.501	0.409	0.066	10.58	0.009	0.393	418.2	0.131737	0.0229008
2009	1	B	5	0.357	0.282	0.066	10.42	0.013	0.255	418.2	0.184874	0.0509804
2009	1	B	5	2.688	2.197	0.294	18.8	0.058	2.083	418.2	0.109375	0.0278445
2009	1	B	5	0.191			7.83	0.01		418.2	0
2009	1	B	5	0.279			9.23	0.01		418.2	0
2009	1	B	5	0.778	0.593	0.042	12.64	0.004	0.58	418.2	0.0539846	0.00689655
2009	1	B	5	2.839	2.361	0.362	19.56	0.017	2.288	418.2	0.12751	0.00743007
2009	1	B	5	3.478	2.965	0.354	20.89	0.004	2.803	418.2	0.101783	0.00142704
2009	1	B	5	3.425	2.821	0.426	21.38	0.055	2.759	418.2	0.12438	0.0199348
2009	1	B	5	0.839	0.751	0.049	13.05	0.01	0.738	418.2	0.0584029	0.0135501
2009	1	B	5	0.587	0.514	0.059	12.25	0.009	0.499	418.2	0.100511	0.0180361
2009	1	B	5	0.571	0.491	0.082	11.69	0.01	0.481	418.2	0.143608	0.02079
2009	1	B	5	0.146			7.71	0.01		418.2	0	#DIV/0!
2009	1	B	5	3.996	3.048	0.681	21.92	0.102	2.969	418.2	0.17042	0.034355
2009	1	B	5	2.855	2.465	0.286	19.84	0.076	2.419	418.2	0.100175	0.0314179
2009	1	B	5	2.261	1.614	0.441	18.72	0.063	1.544	418.2	0.195046	0.0408031
2009	1	B	5	2.75	2.078	0.386	18.83	0.053	2.019	418.2	0.140364	0.0262506
2009	1	B	5	1.099	0.863	0.155	14.34	0.032	0.826	418.2	0.141037	0.0387409
2009	1	B	5	0.432	0.333	0.048	10.12	0.01	0.318	418.2	0.111111	0.0314465
2009	1	B	5	0.348	0.302	0.03	10.32	0.011	0.282	418.2	0.0862069	0.0390071
2009	1	B	5	0.419	0.335	0.016	10.35	0.003	0.314	418.2	0.0381862	0.00955414
2009	1	B	5	0.592	0.521	0.032	11.89	0.012	0.511	418.2	0.0540541	0.0234834
2009	1	B	5	1.158	1.045	0.045	14.86	0.01	1.009	418.2	0.0388601	0.0099108
2009	1	B	5	0.917	0.755	0.064	13.38	0.02	0.728	418.2	0.0697928	0.0274725
2009	1	B	5	0.675	0.582	0.005	12.99	0.01	0.55	418.2	0.00740741	0.0181818
2009	1	B	5	1.343	1.175	0.123	15.16	0.01	1.087	418.2	0.091586	0.00919963
2009	1	B	5	0.069			5.65	0.01		418.2	0
2009	1	B	5	0.16			7.82	0.01		418.2	0
2009	1	B	5	3.554	2.98	0.384	21.44	0.027	2.9	418.2	0.108047	0.00931034
2009	1	B	5	4.294	3.481	0.682	25.54	0.135	3.398	418.2	0.158826	0.0397293
2009	1	B	5	3.81	2.911	0.712	21.2	0.089	2.828	418.2	0.186877	0.031471
2009	1	B	5	1.507	1.28	0.127	14.75	0.01	1.229	418.2	0.0842734	0.0081367
2009	1	B	5	0.928	0.74	0.085	13.66	0.007	0.706	418.2	0.0915948	0.00991501
2009	1	B	5	0.791	0.613	0.084	12.92	0.024		418.2	0.106195
2009	1	B	5	3.599	2.91	0.481	19.78	0.084	2.801	418.2	0.133648	0.0299893
2009	1	B	5	0.885	0.665	0.094	13.41	0.019	0.657	418.2	0.106215	0.0289193
2009	1	B	5	0.767	0.614	0.067	12.15	0.01	0.597	418.2	0.0873533	0.0167504
2009	1	B	5	0.347			9.69	0.01		418.2	0
2009	1	B	5	0.123			7.15	0.01		418.2	0
2009	1	B	5	0.258			9.17	0.01		418.2	0
2009	1	B	5	0.209			8.75	0.01		418.2	0
2009	1	B	5	0.249			8.47	0.01		418.2	0
2009	1	B	5	0.167			7.9	0.01		418.2	0
2009	1	B	5	2.699	2.348	0.223	17.86	0.032	2.272	418.2	0.0826232	0.0140845
2009	1	C	5	0.34	0.289	0.01	10.37	0.01	0.258	418.2	0.0294118	0.0387597
2009	1	C	5	3.681	2.671	0.835	22.15	0.094	2.608	418.2	0.226841	0.0360429
2009	1	C	5	2.509	2.096	0.31	18.66	0.088	2.047	418.2	0.123555	0.0429897
2009	1	C	5	2.238	1.748	0.343	18.25	0.056	1.68	418.2	0.153262	0.0333333
2009	1	C	5	2.274	1.81	0.303	18.65	0.031	1.767	418.2	0.133245	0.0175439
2009	1	C	5	3.807	2.919	0.661	21.57	0.103	2.818	418.2	0.173628	0.0365507
2009	1	C	5	5.295	4.43	0.718	25.16	0.166	4.359	418.2	0.1356	0.0380821
2009	1	C	5	0.169			7.77	0.01		418.2	0
2009	1	C	5	2.873	2.189	0.501	19.97	0.063	2.077	418.2	0.174382	0.0303322
2009	1	C	5	1.905	1.639	0.208	17.92	0.042	1.597	418.2	0.109186	0.0262993
2009	1	C	5	1.855	1.645	0.17	16.67	0.031	1.589	418.2	0.0916442	0.0195091
2009	1	C	5	2.561	2.001	0.432	19.6	0.079	1.918	418.2	0.168684	0.0411887
2009	1	C	5	3.242	2.602	0.524	21.4	0.097	2.493	418.2	0.161629	0.0389089
2009	1	C	5	4.892	3.81	0.939	24.49	0.153	3.656	418.2	0.191946	0.041849
2009	1	C	5	5.387	4.385	0.82	23.71	0.14	4.29	418.2	0.152218	0.032634
2009	1	C	5	3.829	2.872	0.708	20.86	0.111	2.806	418.2	0.184905	0.0395581
2009	1	C	5	4.785	3.732	0.853	21.23	0.145	3.609	418.2	0.178265	0.0401773
2009	1	C	5	4.121	3.006	0.874	21.83	0.106	2.939	418.2	0.212084	0.0360667
2009	1	C	5	0.191			7.86	0.01		418.2	0
2009	1	C	5	2.692	2.038	0.516	19.84	0.079	1.937	418.2	0.191679	0.0407847
2009	1	C	5	1.433	1.113	0.235	15.48	0.03	1.064	418.2	0.163992	0.0281955
2009	1	C	5	1.963	1.552	0.278	16.9	0.041	1.474	418.2	0.14162	0.0278155
2009	1	C	5	0.098			6.17	0.01		418.2	0
2009	1	C	5	0.192			8.55	0.01		418.2	0
2009	1	C	5	0.367			10.35	0.01		418.2	0
2009	1	C	5	2.473	2.019	0.337	18.11	0.043	1.947	418.2	0.136272	0.0220853
2009	1	C	5	3.073	2.52	0.514	19.73	0.076	2.433	418.2	0.167263	0.0312372
2009	1	C	5	2.884	2.305	0.505	18.96	0.051	2.188	418.2	0.175104	0.023309
2009	1	C	5	2.037	1.643	0.285	16.82	0.031	1.572	418.2	0.139912	0.0197201
2009	1	C	5	3.581	2.937	0.563	19.86	0.087	2.813	418.2	0.157219	0.0309278
2009	1	C	5	3.565	2.832	0.689	22.38	0.108	2.697	418.2	0.193268	0.0400445
2009	1	C	5	4.783	3.77	0.847	21.64	0.114	3.319	418.2	0.177086	0.0343477
2009	1	C	5	4.821	3.672	1.036	23.64	0.148	3.573	418.2	0.214893	0.0414218
2009	1	C	5	3.548	2.863	0.581	20.98	0.093	2.765	418.2	0.163754	0.0336347
2009	1	C	5	3.864	3.02	0.235	22.27	0.101	2.898	418.2	0.0608178	0.0348516
2009	1	C	5	3.398	2.606	0.701	21.03	0.105	2.534	418.2	0.206298	0.0414365
2009	1	C	5	1.886	1.533	0.269	17	0.046	1.466	418.2	0.14263	0.0313779
2009	1	C	5	1.103	0.879	0.154	14.77	0.032	0.85	418.2	0.139619	0.0376471
2009	1	C	5	1.743	1.481	0.178	16.9	0.032	1.442	418.2	0.102123	0.0221914
2009	1	C	5	1.532	1.301	0.164	15.45	0.025	1.276	418.2	0.10705	0.0195925
2009	1	C	5	1.636	1.407	0.157	16.65	0.033	1.376	418.2	0.0959658	0.0239826
2009	1	C	5	0.813	0.645	0.099	13	0.026	0.631	418.2	0.121771	0.0412044
2009	1	C	5	0.244			9.4	0.01		418.2	0
2009	1	C	5	0.059			5.7	0.01		418.2	0
2009	1	C	5	1.261	0.981	0.162	14.55	0.032	0.95	418.2	0.128469	0.0336842
2009	1	C	5	2.825	2.304	0.365	19.57	0.072	2.257	418.2	0.129204	0.0319008
2009	1	C	5	5.647	4.182	1.219	25.22	0.134	4.019	418.2	0.215867	0.0333416
2009	1	C	5	4.775	3.469	1.062	23.6	0.102	3.329	418.2	0.222408	0.0306398
2009	1	C	5	4.586	3.386	1.027	23.37	0.101	3.224	418.2	0.223942	0.0313275
2009	1	C	5	4.952	3.641	1.139	22.81	0.142	3.551	418.2	0.230008	0.0399887
2009	1	C	5	3.767	2.92	0.668	21.38	0.079	2.79	418.2	0.177329	0.0283154
2009	1	C	5	2.819	2.147	0.601	19.79	0.074	2.036	418.2	0.213196	0.0363458
2009	1	C	5	2.482	1.89	0.47	19.08	0.063	1.793	418.2	0.189363	0.0351366
2009	1	C	5	2.61	2.057	0.4	18.2	0.071	1.968	418.2	0.153257	0.0360772
2009	1	C	5	2.103	1.661	0.353	16.95	0.046	1.577	418.2	0.167855	0.0291693
2009	2	A	6	3.796	2.85	0.86	22.15	0.097	2.757	259.8	0.226554	0.0351832
2009	2	A	6	2.811	2.199	0.573	20.49	0.07	2.087	259.8	0.203842	0.033541
2009	2	A	6	2.534	2.01	0.489	19.32	0.059	1.932	259.8	0.192976	0.0305383
2009	2	A	6	3.301	2.536	0.682	19.29	0.048	2.441	259.8	0.206604	0.0196641
2009	2	A	6	2.7	1.979	0.618	18.93	0.077	1.914	259.8	0.228889	0.0402299
2009	2	A	6	2.818	2.306	0.438	18.64	0.055	2.216	259.8	0.155429	0.0248195
2009	2	A	6	2.943	2.145	0.677	18.08	0.056	2.041	259.8	0.230037	0.0274375
2009	2	A	6	2.478	2.062	0.387	17.8	0.046	1.933	259.8	0.156174	0.0237972
2009	2	A	6	2.512	1.981	0.471	17.74	0.052	1.891	259.8	0.1875	0.0274987
2009	2	A	6	1.739	1.351	0.315	16.04	0.045	1.284	259.8	0.181139	0.0350467
2009	2	A	6	1.86	1.445	0.373	16.03	0.02	1.359	259.8	0.200538	0.0147167
2009	2	A	6	1.182	0.931	0.217	14.83	0.015	0.869	259.8	0.183587	0.0172612
2009	2	A	6	0.549	0.297	0.739	10.97	0.002	0.42	259.8	1.34608	0.0047619
2009	2	A	6	0.403	0.442	0.402	10.27	0.008	0.276	259.8	0.997519	0.0289855
2009	2	A	6	0.262			9.09	0.01		259.8	0
2009	2	A	6	0.21			8.42	0.01		259.8	0
2009	2	A	6	0.141			8.09	0.01		259.8	0
2009	2	A	6	0.125			6.73	0.01		259.8	0
2009	2	A	6	0.066			6.1	0.01		259.8	0
2009	2	A	6	0.07			5.85	0.01		259.8	0
2009	2	A	6	0.061			5.38	0.01		259.8	0
2009	2	A	6	0.029			4.26	0.01		259.8	0
2009	2	A	6	2.699	2.404	0.278	19.32	0.041	2.343	259.8	0.103001	0.0174989
2009	2	A	6	1.483	1.403	0.173	15.38	0.01	1.36	259.8	0.116655	0.00735294
2009	2	A	6	0.448	0.384	0.054	11.22	0.013	0.359	259.8	0.120536	0.0362117
2009	2	A	6	0.119			6.82	0.01		259.8	0
2009	2	A	6	0.046			4.99	0.01		259.8	0
2009	2	A	6	0.069			5.92	0.01		259.8	0
2009	2	A	6	0.077			6.4	0.01		259.8	0
2009	2	A	6	2.056	1.587	0.405	17.05	0.019	1.495	259.8	0.196984	0.012709
2009	2	A	6	2.418	1.908	0.42	17.04	0.036	1.799	259.8	0.173697	0.0200111
2009	2	A	6	2.52	1.975	0.476	17.76	0.071	1.874	259.8	0.188889	0.0378869
2009	2	A	6	0.083			5.8	0.01		259.8	0
2009	2	A	6	0.008			2.67	0.01		259.8	0
2009	2	A	6	3.964	2.912	0.906	21.34	0.08	2.847	259.8	0.228557	0.0280998
2009	2	A	6	4.681	3.714	0.847	25.64	0.086	2.702	259.8	0.180944	0.0318283
2009	2	A	6	3.469	2.704	0.626	20.21	0.075	2.608	259.8	0.180455	0.0287577
2009	2	A	6	4.211	2.952	0.997	22.64	0.076	2.857	259.8	0.236761	0.0266013
2009	2	A	6	3.355	2.243	0.982	21.22	0.071	2.151	259.8	0.292697	0.0330079
2009	2	A	6	3.396	2.47	0.728	20.48	0.056	2.373	259.8	0.21437	0.0235988
2009	2	A	6	3.755	2.72	0.976	21.48	0.074	2.589	259.8	0.25992	0.0285825
2009	2	A	6	1.666	1.366	0.252	16.1	0.022	1.291	259.8	0.151261	0.0170411
2009	2	A	6	0.036			4.75	0.01		259.8	0
2009	2	A	6	3.101	2.685	0.384	21.37	0.056	2.528	259.8	0.123831	0.0221519
2009	2	A	6	2.726	2.372	0.315	20.21	0.048	2.289	259.8	0.115554	0.0209699
2009	2	A	6	3.192	2.504	0.573	20.83	0.086	2.316	259.8	0.179511	0.037133
2009	2	A	6	2.896	2.476	0.407	20.24	0.079	2.346	259.8	0.140539	0.0336743
2009	2	A	6	2.932	2.568	0.339	19.82	0.073	2.462	259.8	0.115621	0.0296507
2009	2	A	6	2.583	2.296	0.277	18.38	0.056	2.175	259.8	0.10724	0.0257471
2009	2	A	6	1.179	1.017	0.105	15.21	0.009	0.977	259.8	0.0890585	0.00921187
2009	2	A	6	1.046	0.92	0.209	14.43	0.016	0.859	259.8	0.199809	0.0186263
2009	2	A	6	0.563	0.45	0.064	12	0.011	0.43	259.8	0.113677	0.0255814
2009	2	A	6	0.574	0.475	0.172	11.91	0.025	0.425	259.8	0.299652	0.0588235
2009	2	A	6	4.089	3.48	0.523	21.35	0.089	3.339	259.8	0.127904	0.0266547
2009	2	A	6	2.604	2.088	0.429	20.5	0.056	1.985	259.8	0.164747	0.0282116
2009	2	A	6	2.292	1.858	0.333	17.61	0.042	1.798	259.8	0.145288	0.0233593
2009	2	A	6	0.931	0.815	0.073	13.02	0.007	0.771	259.8	0.0784103	0.00907912
2009	2	A	6	0.044			5.21	0.01		259.8	0
2009	2	A	6	5.401	3.995	1.312	24.98	0.151	3.773	259.8	0.242918	0.0400212
2009	2	A	6	5.301	3.844	1.213	23.5	0.129	3.687	259.8	0.228825	0.0349878
2009	2	A	6	4.878	3.59	1.092	22.55	0.12	3.434	259.8	0.223862	0.0349447
2009	2	A	6	4.595	3.486	0.982	22.33	0.056	3.275	259.8	0.213711	0.0170992
2009	2	A	6	4.085	3.161	0.719	22.09	0.042	2.95	259.8	0.17601	0.0142373
2009	2	A	6	4.907	3.766	0.786	21.82	0.108	3.598	259.8	0.160179	0.0300167
2009	2	A	6	2.915	2.179	0.625	19.4	0.033	2.04	259.8	0.214408	0.0161765
2009	2	A	6	2.609	2.168	0.429	21.1	0.057	2.089	259.8	0.164431	0.0272858
2009	2	A	6	2.929	2.633	0.297	19.36	0.025	2.54	259.8	0.1014	0.00984252
2009	2	A	6	2.327	1.932	0.374	18.86	0.046	1.856	259.8	0.160722	0.0247845
2009	2	B	6	4.339	3.454	0.893	20.4	0.098	3.315	259.8	0.205808	0.0295626
2009	2	B	6	2.286	1.803	0.361	17.05	0.044	1.712	259.8	0.157918	0.0257009
2009	2	B	6	0.453	0.342	0.095	10.69	0.014	0.322	259.8	0.209713	0.0434783
2009	2	B	6	0.208			9.29	0.01		259.8	0
2009	2	B	6	0.2			8.69	0.01		259.8	0
2009	2	B	6	3.543	2.806	0.592	21.06	0.101	2.701	259.8	0.16709	0.0373936
2009	2	B	6	2.3	1.861	0.396	17.71	0.048	1.8	259.8	0.172174	0.0266667
2009	2	B	6	0.433	0.341	0.06	16.14	0.01	0.321	259.8	0.138568	0.0311526
2009	2	B	6	1.038	0.823	0.153	13.19	0.008	0.79	259.8	0.147399	0.0101266
2009	2	B	6	0.631	0.488	0.089	11.18	0.017	0.458	259.8	0.141046	0.0371179
2009	2	B	6	0.339	0.25	0.057	10.21	0.009	0.236	259.8	0.168142	0.0381356
2009	2	B	6	0.345	0.258	0.055	10	0.014	0.243	259.8	0.15942	0.0576132
2009	2	B	6	0.292			9.67	0.01		259.8	0
2009	2	B	6	0.218			9.33	0.01		259.8	0
2009	2	B	6	0.217			8.71	0.01		259.8	0
2009	2	B	6	0.162			7.35	0.01		259.8	0
2009	2	B	6	0.04			4.71	0.01		259.8	0
2009	2	B	6	0.03			4.25	0.01		259.8	0
2009	2	B	6	0.022			3.79	0.01		259.8	0
2009	2	B	6	0.498	0.404	0.068	11.17	0.021	0.399	259.8	0.136546	0.0526316
2009	2	B	6	0.784	0.632	0.11	12.23	0.019	0.601	259.8	0.140306	0.031614
2009	2	B	6	1.27	1.076	0.139	14.2	0.015	1.038	259.8	0.109449	0.0144509
2009	2	B	6	2.304	1.949	0.315	18.43	0.064	1.867	259.8	0.136719	0.0342796
2009	2	B	6	2.792	2.32	0.417	19.75	0.057	2.226	259.8	0.149355	0.0256065
2009	2	B	6	2.578	2.164	0.362	18.95	0.064	2.088	259.8	0.140419	0.0306513
2009	2	B	6	1.66	1.376	0.252	16	0.028	1.312	259.8	0.151807	0.0213415
2009	2	B	6	3.775	3.132	0.512	19.37	0.084	3.059	259.8	0.135629	0.02746
2009	2	B	6	0.504	0.401	0.056	11.05	0.01	0.367	259.8	0.111111	0.027248
2009	2	B	6	0.62	0.518	0.053	12.05	0.007	0.496	259.8	0.0854839	0.0141129
2009	2	B	6	0.464	0.34	0.041	10.33	0.01	0.319	259.8	0.0883621	0.031348
2009	2	B	6	0.371	0.274	0.052	10.24	0.013	0.249	259.8	0.140162	0.0522088
2009	2	B	6	0.019			3.27	0.01		259.8	0
2009	2	B	6	3.042	2.473	0.537	22.54	0.071	2.374	259.8	0.176529	0.0299073
2009	2	B	6	3.426	2.624	0.652	19.61	0.065	2.58	259.8	0.190309	0.0251938
2009	2	B	6	1.831	1.624	0.205	16.67	0.032	1.554	259.8	0.111961	0.020592
2009	2	B	6	2.009	1.572	0.351	16.55	0.027	1.503	259.8	0.174714	0.0179641
2009	2	B	6	1.214	0.951	3.171	14.41	0.012	0.903	259.8	2.61203	0.013289
2009	2	B	6	0.512	0.422	0.099	11.11	0.002	0.397	259.8	0.193359	0.00503778
2009	2	B	6	0.722	0.54	0.153	11.89	0.017	0.497	259.8	0.211911	0.0342052
2009	2	B	6	1.641	1.288	0.287	15.27	0.035	1.223	259.8	0.174893	0.0286182
2009	2	B	6	3.068	2.552	0.436	19.71	0.058	2.483	259.8	0.142112	0.0233588
2009	2	B	6	0.871	0.763	0.098	13.77	0.02	0.74	259.8	0.112514	0.027027
2009	2	B	6	2.462	2.033	0.417	19.37	0.064	1.961	259.8	0.169374	0.0326364
2009	2	B	6	0.741	0.608	0.097	12.62	0.003	0.562	259.8	0.130904	0.00533808
2009	2	B	6	0.133			7.75	0.01		259.8	0
2009	2	B	6	0.261	0.187	0.045	9.06	0.007	0.177	259.8	0.172414	0.039548
2009	2	B	6	0.46	0.372	0.05	10.52	0.01	0.354	259.8	0.108696	0.0282486
2009	2	C	6	1.609	1.311	0.157	15.36	0.015	1.218	259.8	0.0975761	0.0123153
2009	2	C	6	3.292	2.746	0.481	21.35	0.075	2.612	259.8	0.146112	0.0287136
2009	2	C	6	3.822	2.967	0.774	24.42	0.113	2.842	259.8	0.202512	0.0397607
2009	2	C	6	5.454	4.078	1.237	23.78	0.12	3.934	259.8	0.226806	0.0305033
2009	2	C	6	1.595	1.275	0.279	15.13	0.032	1.223	259.8	0.174922	0.0261652
2009	2	C	6	0.446	0.345	0.087	10.75	0.007	0.323	259.8	0.195067	0.0216718
2009	2	C	6	0.6	0.492	0.073	12	0.01	0.474	259.8	0.121667	0.021097
2009	2	C	6	0.548	0.431	0.08	11.34	0.002	0.399	259.8	0.145985	0.00501253
2009	2	C	6	1.072	0.792	0.264	13.49	0.107	0.755	259.8	0.246269	0.141722
2009	2	C	6	4.77	4.008	0.653	22.95	0.117	3.906	259.8	0.136897	0.0299539
2009	2	C	6	3.964	3.322	0.517	22.33	0.105	3.242	259.8	0.130424	0.0323874
2009	2	C	6	3.821	3.335	0.423	19.97	0.083	3.25	259.8	0.110704	0.0255385
2009	2	C	6	2.824	2.391	0.33	19.14	0.072	2.326	259.8	0.116856	0.0309544
2009	2	C	6	1.958	1.769	0.188	17.02	0.045	1.712	259.8	0.0960163	0.026285
2009	2	C	6	1.646	1.367	0.185	16.14	0.037	1.32	259.8	0.112394	0.0280303
2009	2	C	6	1.723	1.251	0.145	15.72	0.037	1.2	259.8	0.0841555	0.0308333
2009	2	C	6	1.596	1.286	0.14	15.38	0.028	1.218	259.8	0.0877193	0.0229885
2009	2	C	6	1.442	1.135	0.191	14.69	0.033	1.078	259.8	0.132455	0.0306122
2009	2	C	6	0.928	0.72	0.135	13.02	0.026	0.689	259.8	0.145474	0.0377358
2009	2	C	6	0.576	0.439	0.075	11.69	0.013	0.408	259.8	0.130208	0.0318627
2009	2	C	6	0.379	0.309	0.036	10.02	0.014	0.279	259.8	0.0949868	0.0501792
2009	2	C	6	0.315			9.55	0.01		259.8	0
2009	2	C	6	0.066			8.43	0.01		259.8	0
2009	2	C	6	0.195			5.82	0.01		259.8	0
2009	2	C	6	0.196			8.44	0.01		259.8	0
2009	2	C	6	0.265			9.12	0.01		259.8	0
2009	2	C	6	0.28			9.13	0.01		259.8	0
2009	2	C	6	3.181	2.563	0.441	18.09	0.06	2.474	259.8	0.138636	0.0242522
2009	2	C	6	3.669	2.802	0.692	19.72	0.095	2.638	259.8	0.188607	0.0360121
2009	2	C	6	3.354	2.499	0.566	20.32	0.081	2.384	259.8	0.168754	0.0339765
2009	2	C	6	3.958	3.067	0.522	21.27	0.08	2.942	259.8	0.131885	0.0271924
2009	2	C	6	5.47	4.524	0.947	24.86	0.138	4.343	259.8	0.173126	0.0317753
2009	2	C	6	0.443	0.375	0.066	10.7	0.02	0.351	259.8	0.148984	0.0569801
2009	2	C	6	0.496	0.405	0.089	11.07	0.022	0.364	259.8	0.179435	0.0604396
2009	2	C	6	5.947	4.59	1.189	25.68	0.195	4.447	259.8	0.199933	0.0438498
2009	2	C	6	5.268	4.872	0.973	24.66	0.172	4.136	259.8	0.1847	0.0415861
2009	2	C	6	5.367	4.229	0.953	24.47	0.171	4.089	259.8	0.177567	0.0418195
2009	2	C	6	4.611	3.949	0.59	23.56	0.083	3.817	259.8	0.127955	0.0217448
2009	2	C	6	4.891	3.979	0.846	23.06	0.143	3.866	259.8	0.172971	0.0369891
2009	2	C	6	2.718	2.157	0.482	19.62	0.061	2.061	259.8	0.177336	0.0295973
2009	2	C	6	1.798	1.528	0.235	16.75	0.04	1.486	259.8	0.130701	0.0269179
2009	2	C	6	1.584	1.383	0.278	15.83	0.027	1.341	259.8	0.175505	0.0201342
2009	2	C	6	0.874	0.759	0.107	13	0.024	0.726	259.8	0.122426	0.0330579
2009	2	C	6	0.558	0.48	0.06	11.25	0.007	0.452	259.8	0.107527	0.0154867
2009	2	C	6	6.49	4.817	1.499	24.68	0.163	4.63	259.8	0.230971	0.0352052
2009	2	C	6	3.386	2.783	0.554	21.77	0.082	2.703	259.8	0.163615	0.0303367
2009	2	C	6	4.311	3.239	0.892	20.83	0.123	3.141	259.8	0.206913	0.0391595
2009	2	C	6	3.159	2.728	0.354	20.16	0.061	2.65	259.8	0.112061	0.0230189
2009	2	C	6	3.073	2.426	0.509	19.96	0.072	2.274	259.8	0.165636	0.0316623
2009	2	C	6	3.121	2.461	0.604	19.79	0.065	2.311	259.8	0.193528	0.0281264
2009	2	C	6	3.04	2.343	0.7	19.57	0.092	2.179	259.8	0.230263	0.0422212
2009	2	C	6	2.5	1.966	0.404	18.72	0.049	1.872	259.8	0.1616	0.0261752
2009	2	C	6	1.87	1.465	0.391	16.68	0.052	1.38	259.8	0.209091	0.0376812
2009	2	C	6	0.903	0.711	0.155	13.16	0.038	0.663	259.8	0.17165	0.0573152
2009	2	C	6	3.572	3.045	0.404	21.82	0.085	2.912	259.8	0.113102	0.0291896
2009	2	C	6	5.257	4.379	0.762	24.9	0.126	4.233	259.8	0.14495	0.0297661
2009	2	C	6	4.79	3.616	0.907	23.79	0.125	3.379	259.8	0.189353	0.0369932
2009	2	C	6	4.418	3.5	0.734	23.54	0.123	3.339	259.8	0.166139	0.0368374
2009	2	C	6	4.617	3.498	0.651	22.81	0.097	1.374	259.8	0.141001	0.0705968
2009	2	C	6	3.089	2.601	0.483	22	0.111	2.547	259.8	0.156361	0.0435807
2009	2	C	6	4.167	3.467	0.606	21.39	0.1	3.303	259.8	0.145428	0.0302755
2009	2	C	6	2.942	2.463	0.405	19.66	0.082	2.306	259.8	0.137661	0.0355594
2009	2	C	6	4.177	0.571	3.594	12.6	0.01	0.506	259.8	0.860426	0.0197628
2009	2	C	6	0.106			6.69	0.001		259.8	0
2009	2	A	7	0.132			6.67	0.001		364	0
2009	2	A	7	0.295			9.41	0.034		364	0
2009	2	A	7	0.529			10.11	1.086		364	0
2009	2	A	7	1.978	1.316	0.662	15.74	0.171	0.021	364	0.334681	8.14286
2009	2	A	7	2.435	1.895	0.54	18.45	0.416	0.044	364	0.221766	9.45455
2009	2	A	7	3.128	2.538	0.59	18.75	0.377	0.05	364	0.188619	7.54
2009	2	A	7	2.968	2.327	0.641	19.35	0.497	0.054	364	0.21597	9.2037
2009	2	A	7	4.081	3.193	0.888	21.57	0.705	0.074	364	0.217594	9.52703
2009	2	A	7	4.856	3.323	1.533	24.04	1.161	0.093	364	0.315692	12.4839
2009	2	A	7	0.175			7.04	0.001		364	0
2009	2	A	7	0.33	0.275	0.055	10	0.033		364	0.166667
2009	2	A	7	0.765	0.647	0.118	12.69	0.091	0.013	364	0.154248	7
2009	2	A	7	2.047	1.678	0.369	16.06	0.197	0.018	364	0.180264	10.9444
2009	2	A	7	4.055	3.415	0.64	25.24	0.483	0.112	364	0.15783	4.3125
2009	2	A	7	0.101			6.81	0.001	0	364	0
2009	2	A	7	0.266			8.94	0.001		364	0
2009	2	A	7	0.375			9.88	0.001		364	0
2009	2	A	7	0.32	0.245	0.075	10.15	0.07	0.013	364	0.234375	5.38462
2009	2	A	7	0.746	0.616	0.13	12.31	0.078	0.591	364	0.174263	0.13198
2009	2	A	7	0.728	0.621	0.107	12.47	0.062	0.015	364	0.146978	4.13333
2009	2	A	7	3.488	2.872	0.616	22.02	0.478	0.077	364	0.176606	6.20779
2009	2	A	7	2.29	1.843	0.447	12.24	0.29	0.042	364	0.195197	6.90476
2009	2	A	7	1.845	1.376	0.469	16.39	0.321	0.032	364	0.254201	10.0312
2009	2	A	7	2.049	1.62	0.429	16.73	0.324	0.037	364	0.20937	8.75676
2009	2	A	7	2.502	1.977	0.525	17.77	0.412	0.046	364	0.209832	8.95652
2009	2	A	7	2.515	1.904	0.611	18.65	0.428	0.037	364	0.242942	11.5676
2009	2	A	7	2.913	2.191	0.722	18.82	0.569	2.088	364	0.247854	0.27251
2009	2	A	7	2.936	2.237	0.699	20.23	0.409	0.054	364	0.238079	7.57407
2009	2	A	7	4.099	3.161	0.938	21.04	0.728	0.07	364	0.228836	10.4
2009	2	A	7	3.656	3.122	0.534	22.32	0.356	0.068	364	0.146061	5.23529
2009	2	A	7	3.685	3.27	0.415	23.58	0.286	0.046	364	0.112619	6.21739
2009	2	A	7	2.801	2.183	0.618	18.43	0.433	0.048	364	0.220635	9.02083
2009	2	A	7	3.037	2.432	0.605	18.76	0.39	0.058	364	0.19921	6.72414
2009	2	A	7	3.02	2.271	0.749	18.82	0.445	0.051	364	0.248013	8.72549
2009	2	A	7	3.241	2.511	0.73	20.15	0.428	0.047	364	0.225239	9.10638
2009	2	A	7	3.182	2.434	0.748	20.49	0.568	0.055	364	0.235072	10.3273
2009	2	A	7	3.585	2.631	0.954	20.62	1.618	0.066	364	0.266109	24.5152
2009	2	A	7	2.98	2.404	0.576	21.66	0.437	0.033	364	0.193289	13.2424
2009	2	A	7	3.78	2.895	0.885	21.74	0.683	0.059	364	0.234127	11.5763
2009	2	A	7	4.579	3.253	1.326	22.54	0.499	0.064	364	0.289583	7.79688
2009	2	A	7	2.111	1.858	0.253	18.13	0.232	0.022	364	0.119848	10.5455
2009	2	A	7	2.323	1.851	0.472	18.26	0.25	0.022	364	0.203186	11.3636
2009	2	A	7	2.344	2.109	0.235	18.68	0.195	0.032	364	0.100256	6.09375
2009	2	A	7	2.153	1.825	0.328	19.14	1.171	1.759	364	0.152346	0.665719
2009	2	A	7	2.961	2.332	0.629	19.4	0.366	0.028	364	0.212428	13.0714
2009	2	A	7	3.029	2.496	0.533	19.84	0.407	0.038	364	0.175966	10.7105
2009	2	A	7	3.509	2.694	0.815	19.97	0.505	0.048	364	0.23226	10.5208
2009	2	A	7	3.463	2.939	0.524	21.49	0.42	0.035	364	0.151314	12
2009	2	A	7	4.232	3.235	0.997	23.69	0.745	0.046	364	0.235586	16.1957
2009	2	A	7	3.601	2.89	0.711	23.93	0.535	0.087	364	0.197445	6.14943
2009	2	A	7	3.122	2.368	0.754	19.3	0.421	0.019	364	0.241512	22.1579
2009	2	A	7	3.31	2.565	0.745	19.32	0.577	0.02	364	0.225076	28.85
2009	2	B	7	0.381	0.31	0.071	10.53	0.04	0.016	364	0.186352	2.5
2009	2	B	7	0.969	0.792	0.177	13.77	0.114	0.005	364	0.182663	22.8
2009	2	B	7	2.013	1.591	0.422	16.46	0.301	0.024	364	0.209637	12.5417
2009	2	B	7	3.253	2.489	0.764	19.74	0.499	0.038	364	0.23486	13.1316
2009	2	B	7	2.954	2.203	0.751	19.88	0.457	0.068	364	0.254232	6.72059
2009	2	B	7	3.721	2.706	1.015	21.2	0.718	0.077	364	0.272776	9.32468
2009	2	B	7	4.096	3.141	0.955	21.55	0.752	0.084	364	0.233154	8.95238
2009	2	B	7	0.181			8.02	0.001		364	0
2009	2	B	7	0.251			8.73	0.001		364	0
2009	2	B	7	0.288			9.32	0.001		364	0
2009	2	B	7	0.663	0.539	0.124	11.44	0.053	0.018	364	0.187029	2.94444
2009	2	B	7	0.906	0.726	0.18	13.37	0.116	0.008	364	0.198675	14.5
2009	2	B	7	1.105	0.885	0.22	13.59	0.13	0.018	364	0.199095	7.22222
2009	2	B	7	0.882	0.697	0.185	13.65	0.096	0.018	364	0.209751	5.33333
2009	2	B	7	1.326	1.067	0.259	14.31	0.167	0.029	364	0.195324	5.75862
2009	2	B	7	3.047	2.361	0.686	16.66	0.466	0.052	364	0.225139	8.96154
2009	2	B	7	3.149	2.495	0.654	18.89	0.508	0.053	364	0.207685	9.58491
2009	2	B	7	3.212	2.528	0.684	19.65	0.467	0.05	364	0.212951	9.34
2009	2	B	7	0.399	0.382	0.017	11.31	0.356	0.365	364	0.0426065	0.975342
2009	2	B	7	2.949	2.291	0.658	18.54	0.364	0.055	364	0.223126	6.61818
2009	2	B	7	2.959	2.668	0.291	19.86	0.182	0.048	364	0.098344	3.79167
2009	2	B	7	3.912	2.529	1.383	23.68	1.002	0.1	364	0.353528	10.02
2009	2	B	7	4.361	2.979	1.382	23.85	1.063	0.083	364	0.3169	12.8072
2009	2	B	7	0.082			5.84	0.001		364	0
2009	2	B	7	0.138			8.24	0.001		364	0
2009	2	B	7	0.367	0.268	0.099	10.1	0.025	0.022	364	0.269755	1.13636
2009	2	B	7	0.412	0.311	0.101	10.35	0.038	0.017	364	0.245146	2.23529
2009	2	B	7	0.849	0.663	0.186	12.58	0.07	0.014	364	0.219081	5
2009	2	B	7	3.331	2.582	0.749	18.78	0.366	0.07	364	0.224857	5.22857
2009	2	B	7	3.241	2.482	0.759	18.9	0.403	0.043	364	0.234187	9.37209
2009	2	B	7	0.097			6.65	0.001	0	364	0
2009	2	B	7	0.119			6.96	0.001		364	0
2009	2	B	7	0.221			8.38	0.001		364	0
2009	2	B	7	0.41	0.339	0.071	10.09	0.01	0.028	364	0.173171	2.8
2009	2	B	7	0.405	0.323	0.082	10.36	0.012	0.046	364	0.202469	3.83333
2009	2	B	7	0.653	0.571	0.082	12.16	0.001	0.055	364	0.125574	55
2009	2	B	7	0.669	0.512	0.157	12.24	0.024	0.088	364	0.234679	3.66667
2009	2	B	7	0.754	0.597	0.157	12.45	0.017	0.057	364	0.208223	3.35294
2009	2	B	7	0.99	0.819	0.171	13.22	0.019	0.094	364	0.172727	4.94737
2009	2	B	7	5.367	4.036	1.331	22.92	0.108	1.017	364	0.247997	9.41667
2009	2	B	7	0.417	0.348	0.069	10.54	0.064	0.33	364	0.165468	5.15625
2009	2	B	7	0.498	0.384	0.114	10.75	0.007	0.045	364	0.228916	6.42857
2009	2	B	7	0.623	0.56	0.063	11.58	0.008	0.034	364	0.101124	4.25
2009	2	B	7	0.59	0.489	0.101	11.95	0.07	0.452	364	0.171186	6.45714
2009	2	B	7	0.836	0.669	0.167	12.74	0.007	0.091	364	0.199761	13
2009	2	B	7	0.904	0.79	0.114	13.19	0.104	0.732	364	0.126106	7.03846
2009	2	B	7	1.412	1.156	0.256	13.72	0.023	0.151	364	0.181303	6.56522
2009	2	B	7	1.28	1.062	0.218	13.97	0.01	0.071	364	0.170313	7.1
2009	2	B	7	1.177	0.937	0.24	14.29	0.018	0.157	364	0.203908	8.72222
2009	2	B	7	1.124	0.937	0.187	14.68	0.106	0.873	364	0.16637	8.23585
2009	2	B	7	1.306	1.042	0.264	14.89	0.016	0.17	364	0.202144	10.625
2009	2	B	7	1.436	1.19	0.246	15.1	0.01	0.133	364	0.171309	13.3
2009	2	B	7	0.092			6.67	0.001		364	0
2009	2	B	7	0.176			8.21	0.001		364	0
2009	2	B	7	0.243			8.41	0.001		364	0
2009	2	B	7	0.338			9.97	0.009		364	0
2009	2	B	7	0.241			10.65	0.025		364	0
2009	2	B	7	0.793	0.441	0.067	11.87	0.064	0.423	364	0.0844893	0.1513
2009	2	B	7	0.699	0.631	0.068	12.49	0.016	0.053	364	0.0972818	0.301887
2009	2	B	7	0.602	0.491	0.111	12.64	0.014	0.055	364	0.184385	0.254545
2009	2	B	7	0.8	0.718	0.082	12.99	0.016	0.06	364	0.1025	0.266667
2009	2	B	7	0.76	0.68	0.08	13.49	0.016	0.047	364	0.105263	0.340426
2009	2	B	7	0.932	0.871	0.061	13.91	0.002	0.051	364	0.0654506	0.0392157
2009	2	B	7	0.998	0.891	0.107	14.02	0.02	0.074	364	0.107214	0.27027
2009	2	B	7	1.045	0.938	0.107	14.3	0.023	0.072	364	0.102392	0.319444
2009	2	B	7	0.566	0.434	0.132	14.43	0.024	0.04	364	0.233216	0.6
2009	2	B	7	1.337	1.095	0.242	14.81	0.027	0.131	364	0.181002	0.206107
2009	2	B	7	1.86	1.492	0.368	16.76	0.034	0.239	364	0.197849	0.142259
2009	2	B	7	0.309	0.216	0.093	10.09	0.023	0.017	364	0.300971	1.35294
2009	2	B	7	0.425	0.322	0.103	10.67	0.035	0.019	364	0.242353	1.84211
2009	2	B	7	0.553	0.407	0.146	11.45	0.001	0.015	364	0.264014	0.0666667
2009	2	B	7	0.637	0.499	0.138	12.22	0.067	0.016	364	0.216641	4.1875
2009	2	B	7	1.759	1.405	0.354	15.56	0.234	0.036	364	0.201251	6.5
2009	2	B	7	0.126			7.43	0.001		364	0
2009	2	B	7	0.116			7.86	0.001		364	0
2009	2	B	7	1.179	0.708	0.471	13.86	0.011	0.056	364	0.399491	0.196429
2009	2	B	7	2.939	2.319	0.62	14.29	0.016	0.571	364	0.210956	0.028021
2009	2	B	7	0.944	0.92	0.024	15	0.046	0.887	364	0.0254237	0.0518602
2009	2	B	7	1.237	1.199	0.038	15.02	0.052	1.152	364	0.0307195	0.0451389
2009	2	B	7	1.443	1.225	0.218	15.43	0.138	1.118	364	0.151074	0.123435
2009	2	B	7	1.433	0.763	0.67	15.56	0.021	1.426	364	0.467551	0.0147265
2009	2	B	7	0.8	0.742	0.625	15.87	0.019	0.733	364	0.78125	0.0259209
2009	2	B	7	1.978	1.838	0.14	17.05	0.134	1.778	364	0.0707786	0.0753656
2009	2	B	7	1.464	1.317	0.147	18.55	0.129	1.267	364	0.10041	0.101815
2009	2	B	7	2.442	2.248	0.194	19.25	0.15	2.194	364	0.0794431	0.0683683
2009	2	B	7	3.238	2.399	0.839	19.73	0.043	0.523	364	0.259111	0.082218
2009	2	B	7	4.668	3.465	1.203	22.02	0.055	0.466	364	0.257712	0.118026
2009	2	C	7	4.138	3.188	0.95	20.36	0.091	0.765	364	0.22958	0.118954
2009	2	C	7	5.66	4.167	1.493	24.15	0.141	1.184	364	0.263781	0.119088
2009	2	C	7	2.3	2.035	0.265	18.66	0.036	0.172	364	0.115217	0.209302
2009	2	C	7	0.119			6.78	0.001		364	0
2009	2	C	7	0.16			8.04	0.001		364	0
2009	2	C	7	0.26			8.06	0.001		364	0
2009	2	C	7	1.296	1.048	0.248	15.02	0.022	0.178	364	0.191358	0.123596
2009	2	C	7	3.386	2.713	0.673	18.91	0.053	0.459	364	0.19876	0.115468
2009	2	C	7	3.778	2.627	1.151	21.74	0.108	0.928	364	0.304659	0.116379
2009	2	C	7	3.921	2.946	0.975	21.8	0.095	0.759	364	0.248661	0.125165
2009	2	C	7	4.174	3.226	0.948	21.9	0.08	0.442	364	0.22712	0.180995
2009	2	C	7	5.226	3.91	1.316	22.77	0.119	1.044	364	0.251818	0.113985
2009	2	C	7	0.724	0.603	0.121	12.81	0.005	0.089	364	0.167127	0.0561798
2009	2	C	7	3.406	2.637	0.769	20.34	0.061	0.437	364	0.225778	0.139588
2009	2	C	7	4.117	3.318	0.799	20.62	0.075	0.628	364	0.194073	0.119427
2009	2	C	7	3.97	2.965	1.005	22.38	0.064	0.606	364	0.253149	0.105611
2009	2	C	7	4.949	3.546	1.403	23.08	0.097	0.817	364	0.283492	0.118727
2009	2	C	7	5.612	4.034	1.578	24.6	0.128	1.098	364	0.281183	0.116576
2009	2	C	7	2.222	1.728	0.351	16.87	0.014	0.337	364	0.157966	0.041543
2009	2	C	7	4.957	3.668	0.867	21.68	0.126	0.741	364	0.174904	0.17004
2009	2	C	7	0.062			6.06	0.001		364	0
2009	2	C	7	0.766	0.621	0.145	12.36	0.003	0.074	364	0.189295	0.0405405
2009	2	C	7	1.748	1.404	0.344	16.1	0.031	0.213	364	0.196796	0.14554
2009	2	C	7	1.62	1.221	0.399	17.04	0.027	0.185	364	0.246296	0.145946
2009	2	C	7	2.009	1.677	0.332	17.42	0.038	0.241	364	0.165256	0.157676
2009	2	C	7	2.611	2.042	0.569	18.91	0.05	0.358	364	0.217924	0.139665
2009	2	C	7	3.432	2.74	0.692	20	0.069	0.538	364	0.201632	0.128253
2009	2	C	7	3.416	2.537	0.879	20.27	0.075	0.529	364	0.257319	0.141777
2009	2	C	7	3.885	2.871	1.014	21.54	0.09	0.567	364	0.261004	0.15873
2009	2	C	7	3.215	2.527	0.688	21.76	0.098	0.493	364	0.213997	0.198783
2009	2	C	7	5.131	3.892	1.239	23.14	0.17	0.982	364	0.241473	0.173116
2009	2	C	7	4.487	3.372	1.115	23.65	0.107	0.704	364	0.248496	0.151989
2009	2	C	7	4.411	3.696	0.715	24.59	0.112	0.55	364	0.162095	0.203636
2009	2	C	7	5.504	4.099	1.405	24.73	0.121	0.91	364	0.255269	0.132967
2009	2	C	7	0.991	0.888	0.103	14.22	0.023	0.257	364	0.103935	0.0894942
2009	2	C	7	3.346	2.522	0.824	19.29	0.116	0.537	364	0.246264	0.216015
2009	2	C	7	3.076	2.707	0.369	21.15	0.062	0.274	364	0.119961	0.226277
2009	2	C	7	1.365	1.191	0.174	15.4	0.029	0.126	364	0.127473	0.230159
2009	2	C	7	3.666	2.722	0.944	20.19	0.08	0.646	364	0.257501	0.123839
2009	2	C	7	3.829	2.858	0.971	20.95	0.109	0.723	364	0.253591	0.150761
2009	2	C	7	3.155	2.732	0.423	21.14	0.076	0.325	364	0.134073	0.233846
2009	2	C	7	4.003	2.963	1.04	21.97	0.083	0.547	364	0.259805	0.151737
2009	2	C	7	4.687	3.703	0.984	22.27	0.109	0.643	364	0.209942	0.169518
2009	2	C	7	4.327	3.73	0.597	23.25	0.105	0.414	364	0.137971	0.253623
2009	2	C	7	5.196	3.452	1.744	23.68	0.122	1.504	364	0.335643	0.081117
2009	2	A	8	1.024	0.783	0.241	14.53	0.105	0.701	236	0.235352	0.149786
2009	2	A	8	3.206	2.352	0.854	19.62	0.543	2.259	236	0.266376	0.240372
2009	2	A	8	4.128	3.175	0.953	20.73	0.659	3.062	236	0.230862	0.215219
2009	2	A	8	4.254	2.969	1.285	21.89	0.735	2.826	236	0.302069	0.260085
2009	2	A	8	4.882	3.544	1.338	23.26	0.877	3.368	236	0.274068	0.260392
2009	2	A	8	2.526	1.929	0.597	18.08	0.426	1.843	236	0.236342	0.231145
2009	2	A	8	3.085	2.308	0.777	19.35	0.334	2.233	236	0.251864	0.149575
2009	2	A	8	2.875	2.457	0.418	20.05	0.347	2.355	236	0.145391	0.147346
2009	2	A	8	4.425	3.413	1.012	21.4	0.777	3.28	236	0.228701	0.23689
2009	2	A	8	4.071	3.151	0.92	22.06	0.678	3.006	236	0.225989	0.225549
2009	2	A	8	2.261	1.753	0.508	17.41	0.358	1.677	236	0.224679	0.213476
2009	2	A	8	2.534	1.944	0.59	18.14	0.343	1.835	236	0.232833	0.186921
2009	2	A	8	2.822	2.219	0.603	19.21	0.391	2.119	236	0.213678	0.184521
2009	2	A	8	4.216	3.326	0.89	21.43	0.353	3.152	236	0.211101	0.111992
2009	2	A	8	3.383	2.385	0.998	21.4	0.682	2.266	236	0.295004	0.300971
2009	2	A	8	0.175	0.131	0.044	7.8	0.017	0.121	236	0.251429	0.140496
2009	2	A	8	0.28	0.215	0.065	9.1	0.01	0.199	236	0.232143	0.0502513
2009	2	A	8	0.276	0.208	0.068	9.22	0.026	0.192	236	0.246377	0.135417
2009	2	A	8	0.657	0.514	0.143	12.33	0.085	0.472	236	0.217656	0.180085
2009	2	A	8	0.952	0.73	0.222	13.83	0.122	0.696	236	0.233193	0.175287
2009	2	A	8	1.041	0.797	0.244	14.35	0.097	0.744	236	0.23439	0.130376
2009	2	A	8	1.168	0.965	0.203	14.56	0.138	0.886	236	0.173801	0.155756
2009	2	A	8	1.959	1.528	0.431	16.43	0.271	1.473	236	0.22001	0.183978
2009	2	A	8	2.526	1.832	0.694	19.1	0.416	1.74	236	0.274743	0.23908
2009	2	A	8	3.112	2.357	0.755	20.19	0.374	2.238	236	0.242609	0.167113
2009	2	A	8	3.767	3.224	0.543	22.7	0.388	3.095	236	0.144147	0.125363
2009	2	A	8	0.2			7.07	0.001		236	0
2009	2	A	8	0.545	0.419	0.126	11.7	0.038	0.401	236	0.231193	0.0947631
2009	2	A	8	2.646	2.085	0.561	17.99	0.443	1.977	236	0.212018	0.224077
2009	2	A	8	2.804	2.298	0.289	19.12	0.261	2.189	236	0.103067	0.119233
2009	2	A	8	2.971	2.418	0.553	19.97	0.263	2.352	236	0.186133	0.11182
2009	2	A	8	3.889	2.994	0.895	21.12	0.475	2.856	236	0.230136	0.166317
2009	2	A	8	3.788	2.87	0.918	21.87	0.607	2.73	236	0.242344	0.222344
2009	2	A	8	4.195	3.036	1.159	22.57	0.927	2.915	236	0.276281	0.31801
2009	2	A	8	0.409	0.308	0.101	10.73	0.077	0.243	236	0.246944	0.316872
2009	2	A	8	1.262	1.02	0.242	15.47	0.174	0.953	236	0.191759	0.182581
2009	2	A	8	2.59	2.009	0.581	19.21	0.353	1.911	236	0.224324	0.18472
2009	2	A	8	3.53	2.554	0.976	20.9	0.464	2.469	236	0.276487	0.18793
2009	2	B	8	5.022	3.61	1.412	23.33	0.72	3.482	236	0.281163	0.206778
2009	2	B	8	4.603	3.262	1.341	22.66	0.691	2.767	236	0.291332	0.249729
2009	2	B	8	2.881	2.196	0.685	18.97	0.443	2.127	236	0.237765	0.208275
2009	2	B	8	0.576	0.459	0.117	11.88	0.099	0.424	236	0.203125	0.233491
2009	2	B	8	0.459	0.388	0.071	11.09	0.086	0.372	236	0.154684	0.231183
2009	2	B	8	0.361	0.289	0.072	9.85	0.044	0.268	236	0.199446	0.164179
2009	2	B	8	0.406	0.306	0.1	10.38	0.047	0.279	236	0.246305	0.168459
2009	2	B	8	0.955	0.755	0.2	13.97	0.089	0.705	236	0.209424	0.126241
2009	2	B	8	2.448	1.992	0.456	17.91	0.297	1.874	236	0.186275	0.158485
2009	2	B	8	2.551	2.013	0.538	18.74	0.276	1.879	236	0.210898	0.146887
2009	2	B	8	0.482	0.403	0.079	12.21	0.055	0.377	236	0.1639	0.145889
2009	2	B	8	1.283	1.037	0.246	14.63	0.193	0.962	236	0.191738	0.200624
2009	2	B	8	0.978	0.813	0.165	14.84	0.118	0.771	236	0.168712	0.153048
2009	2	B	8	1.33	1.16	0.17	15.07	0.165	1.101	236	0.12782	0.149864
2009	2	B	8	1.919	1.55	0.369	16.82	0.263	1.453	236	0.192288	0.181005
2009	2	B	8	2.476	2.138	0.338	18.01	0.276	2.096	236	0.136511	0.131679
2009	2	B	8	2.097	1.655	0.442	18.06	0.328	1.558	236	0.210777	0.210526
2009	2	B	8	0.061			5.51	0.001		236	0
2009	2	B	8	0.831	0.73	0.101	13.9	0.124	0.65	236	0.12154	0.190769
2009	2	B	8	1.176	1.038	0.138	14.19	0.132	0.912	236	0.117347	0.144737
2009	2	B	8	0.991	0.787	0.204	14.34	0.175	0.739	236	0.205853	0.236806
2009	2	B	8	1.307	1.055	0.252	14.91	0.158	0.985	236	0.192808	0.160406
2009	2	B	8	1.499	1.211	0.288	15.45	0.142	1.137	236	0.192128	0.12489
2009	2	B	8	1.629	1.338	0.291	15.76	0.21	1.26	236	0.178637	0.166667
2009	2	B	8	1.275	1	0.275	15.81	0.228	0.928	236	0.215686	0.24569
2009	2	B	8	1.56	1.296	0.264	16.25	0.205	1.217	236	0.169231	0.168447
2009	2	B	8	1.881	1.476	0.405	17.62	0.244	1.383	236	0.215311	0.176428
2009	2	B	8	2.517	2.014	0.503	18.17	0.336	1.902	236	0.199841	0.176656
2009	2	B	8	3.012	2.381	0.631	18.74	0.506	2.232	236	0.209495	0.226703
2009	2	B	8	3.361	2.714	0.647	18.89	0.349	2.613	236	0.192502	0.133563
2009	2	B	8	2.712	2.241	0.471	19.06	0.44	2.129	236	0.173673	0.20667
2009	2	B	8	3.771	2.903	0.868	19.87	0.605	2.788	236	0.230178	0.217001
2009	2	B	8	3.483	2.742	0.741	19.92	0.555	2.561	236	0.212748	0.216712
2009	2	B	8	4.661	3.656	1.005	22.16	1.521	3.442	236	0.215619	0.441894
2009	2	B	8	4.196	3.12	1.076	22.4	0.696	2.986	236	0.256435	0.233088
2009	2	B	8	0.643	0.518	0.125	11.89	0.103	0.483	236	0.194401	0.213251
2009	2	B	8	0.989	0.826	0.163	13.88	0.106	0.769	236	0.164813	0.137841
2009	2	B	8	2.028	1.625	0.403	15.63	0.271	1.533	236	0.198718	0.176778
2009	2	B	8	1.606	1.437	0.169	16.14	0.13	1.393	236	0.10523	0.0933238
2009	2	B	8	1.851	1.413	0.438	16.35	0.19	1.334	236	0.236629	0.142429
2009	2	B	8	2.229	1.746	0.483	17.72	0.314	1.478	236	0.216689	0.212449
2009	2	B	8	2.953	2.245	0.708	18.97	0.449	2.145	236	0.239756	0.209324
2009	2	B	8	2.53	2.021	0.509	19.18	1.401	1.892	236	0.201186	0.740486
2009	2	B	8	0.684	0.536	0.148	12.29	0.061	0.498	236	0.216374	0.12249
2009	2	B	8	0.656	0.584	0.072	12.93	0.066	0.515	236	0.109756	0.128155
2009	2	B	8	1.811	1.426	0.385	16.21	0.131	1.325	236	0.21259	0.0988679
2009	2	B	8	3.779	2.836	0.943	20.12	0.4	2.728	236	0.249537	0.146628
2009	2	B	8	3.955	3.006	0.949	21.2	0.531	2.341	236	0.239949	0.226826
2009	2	B	8	0.082			6.44	0.001		236	0
2009	2	B	8	0.374	0.283	0.091	10.42	0.034	0.262	236	0.243316	0.129771
2009	2	B	8	0.511	0.38	0.131	11.46	0.044	0.349	236	0.25636	0.126074
2009	2	B	8	1.756	1.362	0.394	15.38	0.206	1.284	236	0.224374	0.160436
2009	2	B	8	1.816	1.376	0.44	17.53	0.218	1.305	236	0.242291	0.16705
2009	2	B	8	4.13	3.053	1.077	21.57	0.572	2.954	236	0.260775	0.193636
2009	2	B	8	2.698	2.243	0.455	19.44	0.298	2.164	236	0.168643	0.137708
2009	2	B	8	2.712	2.283	0.429	19.61	0.246	2.168	236	0.158186	0.113469
2009	2	B	8	3.315	2.719	0.596	21.29	0.371	2.6	236	0.179789	0.142692
2009	2	B	8	3.025	2.522	0.503	21.58	0.314	2.434	236	0.166281	0.129006
2009	2	B	8	0.349	0.302	0.047	10.22	0.03	0.272	236	0.13467	0.110294
2009	2	B	8	1.123	0.935	0.188	14.83	0.121	0.861	236	0.167409	0.140534
2009	2	B	8	1.422	1.184	0.238	14.96	0.176	1.079	236	0.16737	0.163114
2009	2	B	8	2.221	1.773	0.448	16.97	0.197	1.663	236	0.201711	0.118461
2009	2	C	8	0.756	0.599	0.157	12.35	0.078	0.558	236	0.207672	0.139785
2009	2	C	8	1.177	0.912	0.265	14.62	0.041	0.853	236	0.225149	0.0480657
2009	2	C	8	1.609	1.29	0.319	15.62	0.134	0.623	236	0.19826	0.215088
2009	2	C	8	2.369	1.87	0.499	15.54	0.334	1.788	236	0.210637	0.186801
2009	2	C	8	2.636	1.995	0.641	17.78	0.299	1.911	236	0.243171	0.156463
2009	2	C	8	3.274	2.35	0.924	19.86	1.911	2.247	236	0.282224	0.850467
2009	2	C	8	4.666	3.575	1.091	22.42	2.66	3.432	236	0.233819	0.775058
2009	2	C	8	3.337	2.518	0.819	20.28	0.684	2.44	236	0.24543	0.280328
2009	2	C	8	0.051			5.4	0.001		236	0
2009	2	C	8	0.1			6.8	0.001		236	0
2009	2	C	8	0.171			8.17	0.001		236	0
2009	2	C	8	0.22			8.87	0.001		236	0
2009	2	C	8	1.187	0.93	0.257	14.68	0.134	0.887	236	0.216512	0.151071
2009	2	C	8	2.551	1.953	0.598	18.99	0.434	1.863	236	0.234418	0.232958
2009	2	C	8	3.529	2.88	0.649	20.86	0.576	2.783	236	0.183905	0.206971
2009	2	C	8	2.276	1.756	0.52	12.58	0.259	1.677	236	0.228471	0.154442
2009	2	C	8	0.867	0.713	0.154	13.47	0.057	0.661	236	0.177624	0.086233
2009	2	C	8	1.336	1.08	0.256	15.21	0.167	0.994	236	0.191617	0.168008
2009	2	C	8	1.374	1.101	0.273	15.4	0.161	0.993	236	0.19869	0.162135
2009	2	C	8	2.321	1.822	0.499	18.76	0.305	1.682	236	0.214994	0.181332
2009	2	C	8	3.329	2.689	0.64	19.57	0.322	2.443	236	0.19225	0.131805
2009	2	C	8	7.591	5.525	2.066	26.03	1.509	5.312	236	0.272164	0.284074
2009	2	C	8	0.232	0.207	0.025	9.15	0.009	0.2	236	0.107759	0.045
2009	2	C	8	0.342	0.256	0.086	9.77	0.022	0.244	236	0.251462	0.0901639
2009	2	C	8	0.672	0.536	0.136	12.19	0.049	0.51	236	0.202381	0.0960784
2009	2	C	8	0.331			10	0.001		236	0
2009	2	C	8	0.413			10.7	0.001		236	0
2009	2	C	8	1.195	0.948	0.247	14.96	0.128	0.893	236	0.206695	0.143337
2009	2	C	8	1.309	1.146	0.163	15.45	0.141	1.079	236	0.124523	0.130677
2009	2	C	8	1.528	1.208	0.32	15.71	0.203	1.113	236	0.209424	0.18239
2009	2	C	8	1.896	1.459	0.437	16.95	0.353	1.38	236	0.230485	0.255797
2009	2	C	8	2.129	1.592	0.537	17.29	0.324	1.503	236	0.252231	0.215569
2009	2	C	8	2.289	1.808	0.481	18.03	0.364	1.703	236	0.210135	0.21374
2009	2	C	8	3.31	2.489	0.821	21.06	0.625	2.342	236	0.248036	0.266866
2009	2	C	8	3.218	2.447	0.771	21.1	0.587	2.3	236	0.23959	0.255217
2009	2	C	8	4.659	3.48	1.179	22.06	0.987	3.312	236	0.253059	0.298007
2009	2	C	8	6.666	4.818	1.848	25.97	1.429	4.697	236	0.277228	0.304237
2009	2	C	8	2.593	1.948	0.645	18.98	0.215	1.828	236	0.248747	0.117615
2009	2	C	8	3.701	2.849	0.852	20.69	0.417	1.367	236	0.230208	0.305048
2009	2	C	8	3.378	2.823	0.555	21.31	0.395	2.687	236	0.164298	0.147004
2009	2	C	8	4.652	3.783	0.869	21.73	0.493	3.603	236	0.186801	0.13683
2009	2	C	8	0.365	0.266	0.099	9.79	0.031	0.247	236	0.271233	0.125506
2009	2	C	8	0.714	0.535	0.179	12.65	0.053	0.506	236	0.2507	0.104743
2009	2	C	8	1.446	1.085	0.361	15.31	0.158	1.003	236	0.249654	0.157527
2009	2	C	8	4.622	3.309	1.313	22.93	1.145	3.207	236	0.284076	0.357031
2009	2	C	8	2.689	2.102	0.587	28.48	0.273	2.017	236	0.218297	0.13535
2009	2	C	8	3.907	3.297	0.61	21.83	0.455	3.191	236	0.15613	0.142589
2009	2	C	8	3.748	2.839	0.909	20.93	0.607	2.707	236	0.242529	0.224233
2009	3	A	9	0.18			7.56	0.001		64.8	0
2009	3	A	9	2.852	2.031	0.821	20.49	0.505	1.914	64.8	0.287868	0.263845
2009	3	A	9	3.781	2.762	1.019	21.27	0.519	2.636	64.8	0.269505	0.196889
2009	3	A	9	4.644	3.86	0.784	23.56	0.588	3.734	64.8	0.16882	0.157472
2009	3	A	9	5.014	3.641	1.373	23.82	0.994	3.439	64.8	0.273833	0.289038
2009	3	A	9	0.196	0.139	0.057	7.65	0.024	0.133	64.8	0.290816	0.180451
2009	3	A	9	2.672	2.222	0.45	20.24	0.32	2.153	64.8	0.168413	0.14863
2009	3	A	9	0.986	0.764	0.222	15.35	0.155	0.727	64.8	0.225152	0.213205
2009	3	A	9	0.304			10.18	0.001		64.8	0
2009	3	A	9	0.351			10.18	0.001		64.8	0
2009	3	A	9	0.379			10.44	0.001		64.8	0
2009	3	A	9	0.089			7.04	0.001		64.8	0
2009	3	A	9	3.22	2.514	0.706	20.26	0.555	2.413	64.8	0.219255	0.230004
2009	3	A	9	1.866	1.46	0.406	16.99	0.296	1.354	64.8	0.217578	0.218612
2009	3	A	9	0.552	0.504	0.048	12.64	0.053	0.465	64.8	0.0869565	0.113978
2009	3	A	9	0.15			7.89	0.001		64.8	0
2009	3	A	9	0.519	0.438	0.081	12.07	0.05	0.425	64.8	0.156069	0.117647
2009	3	A	9	0.626	0.45	0.176	12.61	0.125	0.421	64.8	0.28115	0.296912
2009	3	A	9	1.808	1.59	0.218	16.31	0.205	1.546	64.8	0.120575	0.1326
2009	3	A	9	3.868	3.017	0.851	21.63	0.621	2.817	64.8	0.22001	0.220447
2009	3	A	9	4.478	3.651	0.827	24.44	0.637	3.508	64.8	0.184681	0.181585
2009	3	A	9	1.436	0.424	1.012	11.65	0.444	0.399	64.8	0.704735	1.11278
2009	3	A	9	3.79	2.899	0.891	19.12	0.642	2.738	64.8	0.235092	0.234478
2009	3	A	9	3.527	2.614	0.913	20.02	0.686	2.466	64.8	0.25886	0.278183
2009	3	A	9	3.551	2.643	0.908	20.25	0.587	2.49	64.8	0.255703	0.235743
2009	3	A	9	4.071	3.184	0.887	20.62	0.647	3.031	64.8	0.217883	0.213461
2009	3	A	9	3.696	3.03	0.666	21.08	0.422	2.931	64.8	0.180195	0.143978
2009	3	A	9	3.152	2.158	0.994	21.66	0.692	1.969	64.8	0.315355	0.351447
2009	3	A	9	3.433	2.701	0.732	21.79	0.56	2.636	64.8	0.213225	0.212443
2009	3	A	9	4.753	3.3	1.453	23.66	1.002	3.135	64.8	0.305702	0.319617
2009	3	A	9	0.097			5.79	0.001		64.8	0
2009	3	A	9	0.26			9.54	0.001		64.8	0
2009	3	A	9	2.432	1.847	0.585	17.45	0.37	1.753	64.8	0.240543	0.211067
2009	3	A	9	2.878	2.178	0.7	19.29	0.472	2.07	64.8	0.243224	0.228019
2009	3	A	9	3.664	2.819	0.845	20.38	0.4	2.656	64.8	0.230622	0.150602
2009	3	A	9	3.683	2.773	0.91	21.08	0.736	2.574	64.8	0.247081	0.285936
2009	3	A	9	3.828	2.95	0.878	21.14	0.658	2.846	64.8	0.229363	0.231202
2009	3	A	9	4.056	3.081	0.975	20.27	0.672	2.926	64.8	0.240385	0.229665
2009	3	A	9	1.834	1.467	0.367	17.4	0.273	1.403	64.8	0.200109	0.194583
2009	3	A	9	3.138	2.504	0.634	20	0.495	2.428	64.8	0.20204	0.203871
2009	3	A	9	3.127	2.745	0.382	21.14	0.318	2.656	64.8	0.122162	0.119729
2009	3	A	9	4.145	3.102	1.043	21.97	0.696	3.044	64.8	0.251628	0.228647
2009	3	A	9	4.245	3.545	0.7	22.69	0.552	3.396	64.8	0.1649	0.162544
2009	3	A	9	5.02	3.397	1.623	23.6	1.252	3.291	64.8	0.323307	0.380431
2009	3	B	9	0.402	0.285	0.117	10.26	0.104	0.276	64.8	0.291045	0.376812
2009	3	B	9	0.515	0.313	0.202	11.32	0.137	0.288	64.8	0.392233	0.475694
2009	3	B	9	1.132	0.522	0.61	12.65	0.386	0.486	64.8	0.538869	0.794239
2009	3	B	9	0.463	0.355	0.108	11.21	0.051	0.32	64.8	0.233261	0.159375
2009	3	B	9	0.586	0.453	0.133	11.97	0.074	0.418	64.8	0.226962	0.177033
2009	3	B	9	0.786	0.622	0.164	13.07	0.122	0.575	64.8	0.208651	0.212174
2009	3	B	9	1.402	0.892	0.51	15.24	0.234	0.822	64.8	0.363766	0.284672
2009	3	B	9	1.795	1.409	0.386	16.83	0.278	1.335	64.8	0.215042	0.20824
2009	3	B	9	2.182	1.69	0.492	17.46	0.325	1.578	64.8	0.225481	0.205957
2009	3	B	9	3.714	2.805	0.909	20.38	0.644	2.657	64.8	0.24475	0.242379
2009	3	B	9	3.342	2.321	1.021	20.64	0.684	2.215	64.8	0.305506	0.308804
2009	3	B	9	0.473	0.355	0.118	11.36	0.055	0.34	64.8	0.249471	0.161765
2009	3	B	9	0.559	0.422	0.137	11.8	0.067	0.397	64.8	0.245081	0.168766
2009	3	B	9	0.593	0.448	0.145	11.91	0.091	0.416	64.8	0.244519	0.21875
2009	3	B	9	0.687	0.56	0.127	13.25	0.071	0.543	64.8	0.184862	0.130755
2009	3	B	9	0.749	0.643	0.106	13.54	0.065	0.626	64.8	0.141522	0.103834
2009	3	B	9	0.865	0.719	0.146	13.8	0.089	0.706	64.8	0.168786	0.126062
2009	3	B	9	1.167	0.901	0.266	14.51	0.167	0.854	64.8	0.227935	0.19555
2009	3	B	9	1.535	1.341	0.194	16.73	0.121	1.31	64.8	0.126384	0.0923664
2009	3	B	9	1.693	1.268	0.425	17.29	0.271	1.214	64.8	0.251034	0.223229
2009	3	B	9	1.754	1.546	0.208	18.03	0.142	1.521	64.8	0.118586	0.0933596
2009	3	B	9	2.202	1.932	0.27	18.35	0.172	1.895	64.8	0.122616	0.0907652
2009	3	B	9	2.76	2.333	0.427	18.98	0.31	2.279	64.8	0.15471	0.136025
2009	3	B	9	3.051	2.47	0.581	20.44	0.437	2.377	64.8	0.190429	0.183845
2009	3	B	9	4.511	3.327	1.184	23.01	0.889	3.172	64.8	0.26247	0.280265
2009	3	B	9	3.321	2.869	0.452	21.71	0.362	2.807	64.8	0.136104	0.128963
2009	3	B	9	4.215	3.465	0.75	21.93	0.599	3.38	64.8	0.177936	0.177219
2009	3	B	9	2.556	2.076	0.48	19.58	0.386	1.968	64.8	0.187793	0.196138
2009	3	B	9	1.289	1.009	0.28	14.8	0.191	0.959	64.8	0.217223	0.199166
2009	3	B	9	1.024	0.782	0.242	14.38	0.174	0.733	64.8	0.236328	0.237381
2009	3	B	9	1.969	1.654	0.315	17.8	0.268	1.584	64.8	0.15998	0.169192
2009	3	B	9	1.882	1.527	0.355	18.01	0.263	1.469	64.8	0.188629	0.179033
2009	3	B	9	2.544	1.992	0.552	18.73	0.324	1.842	64.8	0.216981	0.175896
2009	3	B	9	4.831	3.728	1.103	21.37	0.668	3.578	64.8	0.228317	0.186696
2009	3	B	9	5.421	4.185	1.236	24.26	0.842	3.066	64.8	0.228002	0.274625
2009	3	B	9	1.488	1.261	0.227	17.1	0.28	1.204	64.8	0.152554	0.232558
2009	3	B	9	0.843	0.701	0.142	13.77	0.091	0.676	64.8	0.168446	0.134615
2009	3	B	9	2.215	1.889	0.326	18.28	0.274	1.842	64.8	0.147178	0.148751
2009	3	B	9	1.646	1.404	0.242	16.7	0.142	1.37	64.8	0.147023	0.10365
2009	3	B	9	1.521	1.236	0.285	16.1	0.192	1.201	64.8	0.187377	0.159867
2009	3	B	9	1.259	1.051	0.208	15.99	0.155	1.027	64.8	0.16521	0.150925
2009	3	B	9	0.515	0.438	0.077	11.8	0.055	0.432	64.8	0.149515	0.127315
2009	3	B	9	1.101	0.73	0.371	14.25	0.163	0.687	64.8	0.336966	0.237263
2009	3	B	9	2.307	1.876	0.431	18.05	0.402	1.718	64.8	0.186823	0.233993
2009	3	B	9	0.289		0.289	9.8	0.001		64.8	1
2009	3	B	9	0.444	0.341	0.103	10.53	0.103	0.309	64.8	0.231982	0.333333
2009	3	B	9	0.402	0.33	0.072	10.97	0.074	0.299	64.8	0.179104	0.247492
2009	3	B	9	1.569	0.83	0.739	13.58	0.149	0.753	64.8	0.471001	0.197875
2009	3	B	9	1.227	0.906	0.321	14.85	0.285	0.864	64.8	0.261614	0.329861
2009	3	B	9	1.379	1.105	0.274	15.89	0.233	1.004	64.8	0.198695	0.232072
2009	3	B	9	1.269	0.913	0.356	16.12	0.289	0.848	64.8	0.280536	0.340802
2009	3	B	9	1.57	1.217	0.353	16.49	0.307	1.136	64.8	0.224841	0.270246
2009	3	B	9	1.925	1.464	0.461	17.2	0.385	1.369	64.8	0.239481	0.281227
2009	3	B	9	1.976	1.565	0.411	17.37	0.308	1.476	64.8	0.207996	0.208672
2009	3	B	9	1.929	1.474	0.455	17.4	0.302	1.404	64.8	0.235874	0.2151
2009	3	B	9	1.802	1.387	0.415	17.69	0.299	1.276	64.8	0.2303	0.234326
2009	3	B	9	2.292	1.76	0.532	18.63	0.388	1.682	64.8	0.232112	0.230678
2009	3	B	9	3.543	2.637	0.906	21.58	0.716	2.451	64.8	0.255715	0.292126
2009	3	B	9	4.067	3.06	1.007	22.09	0.735	2.822	64.8	0.247603	0.260454
2009	3	B	9	0.952	0.536	0.416	13.49	0.088	0.222	64.8	0.436975	0.396396
2009	3	B	9	2.539	1.142	1.397	16.26	0.32	1.063	64.8	0.550217	0.301035
2009	3	B	9	1.516	1.132	0.384	16.64	0.304	1.06	64.8	0.253298	0.286792
2009	3	B	9	2.127	1.485	0.642	17.54	0.27	1.422	64.8	0.301834	0.189873
2009	3	B	9	2.902	2.187	0.715	17.76	0.478	2.037	64.8	0.246382	0.234659
2009	3	B	9	3.03	2.078	0.952	18.58	0.319	1.973	64.8	0.314191	0.161683
2009	3	B	9	2.466	1.825	0.641	18.93	0.498	1.758	64.8	0.259935	0.283276
2009	3	B	9	2.502	2.036	0.466	19.44	0.358	1.972	64.8	0.186251	0.181542
2009	3	B	9	3.006	2.259	0.747	19.74	0.596	2.149	64.8	0.248503	0.277338
2009	3	B	9	3.035	2.481	0.554	20.07	0.388	1.903	64.8	0.182537	0.203889
2009	3	B	9	3.636	2.723	0.913	20.19	0.65	2.573	64.8	0.2511	0.252623
2009	3	B	9	3.187	2.365	0.822	20.23	0.362	2.212	64.8	0.257923	0.163653
2009	3	B	9	3.708	2.638	1.07	20.3	0.404	2.574	64.8	0.288565	0.156954
2009	3	B	9	3.717	2.798	0.919	20.42	0.64	2.674	64.8	0.247242	0.239342
2009	3	B	9	3.636	2.836	0.8	20.72	0.69	2.739	64.8	0.220022	0.251917
2009	3	B	9	3.729	2.789	0.94	20.8	0.736	2.686	64.8	0.252078	0.274013
2009	3	B	9	3.111	2.179	0.932	20.81	0.562	2.056	64.8	0.299582	0.273346
2009	3	B	9	3.895	2.828	1.067	20.86	0.715	2.735	64.8	0.273941	0.261426
2009	3	B	9	4.041	3.18	0.861	21.03	0.581	3.07	64.8	0.213066	0.189251
2009	3	B	9	3.441	2.746	0.695	21.11	0.29	2.613	64.8	0.201976	0.110984
2009	3	B	9	3.709	2.616	1.093	21.33	0.792	2.536	64.8	0.294689	0.312303
2009	3	B	9	4.359	2.812	1.547	21.63	1.247	2.716	64.8	0.354898	0.459131
2009	3	B	9	3.72	2.802	0.918	21.91	0.773	3.391	64.8	0.246774	0.227956
2009	3	B	9	3.669	2.802	0.867	22	0.745	2.667	64.8	0.236304	0.27934
2009	3	B	9	4.091	3.014	1.077	22.31	0.736	2.853	64.8	0.263261	0.257974
2009	3	B	9	4.765	3.626	1.139	22.53	0.849	3.453	64.8	0.239035	0.245873
2009	3	B	9	3.831	3.14	0.691	22.75	0.5	3.048	64.8	0.180371	0.164042
2009	3	B	9	4.946	3.391	1.555	23.73	0.843	3.292	64.8	0.314395	0.256075
2009	3	B	9	4.746	3.506	1.24	23.86	0.7801	3.314	64.8	0.261273	0.235395
2009	3	B	9	4.833	3.468	1.365	24.21	1.03	3.29	64.8	0.282433	0.31307
2009	3	B	9	5.655	4.001	1.654	25.02	1.224	3.79	64.8	0.292485	0.322955
2009	3	C	9	3.461	2.596	0.865	19.73	0.621	2.484	64.8	0.249928	0.25
2009	3	C	9	0.474	0.375	0.099	11.78	0.07	0.332	64.8	0.208861	0.210843
2009	3	C	9	4.806	3.828	0.978	22.22	0.614	3.72	64.8	0.203496	0.165054
2009	3	C	9	4.096	2.994	1.102	21.72	0.735	2.822	64.8	0.269043	0.260454
2009	3	C	9	0.365	0.275	0.09	10.33	0.054	0.287	64.8	0.246575	0.188153
2009	3	C	9	3.809	3.139	0.67	22.44	0.498	3.068	64.8	0.175899	0.162321
2009	3	C	9	2.049	1.608	0.441	18.69	0.437	1.499	64.8	0.215227	0.291528
2009	3	C	9	5.234	4.249	0.985	26.12	0.832	4.12	64.8	0.188193	0.201942
2009	3	C	9	3.829	2.705	1.124	22.38	0.665	2.62	64.8	0.293549	0.253817
2009	3	C	9	4.045	2.997	1.048	22.48	0.866	2.838	64.8	0.259085	0.305144
2009	3	C	9	0.404	0.311	0.093	10.59	0.125	0.288	64.8	0.230198	0.434028
2009	3	C	9	0.216			8.47	0.001		64.8	0
2009	3	C	9	4.012	3.233	0.779	21.81	0.687	3.058	64.8	0.194167	0.224657
2009	3	C	9	5.962	4.639	1.323	25.52	0.954	4.444	64.8	0.221905	0.214671
2009	3	C	9	5.95	4.908	1.042	25.35	0.85	3.205	64.8	0.175126	0.265211
2009	3	C	9	2.365	1.753	0.612	19.39	0.428	1.655	64.8	0.258774	0.25861
2009	3	C	9	2.986	2.345	0.641	19.85	0.45	2.244	64.8	0.214668	0.200535
2009	3	C	9	2.621	2.012	0.609	18.74	0.419	1.862	64.8	0.232354	0.225027
2009	3	C	9	1.269	0.935	0.334	15.59	0.237	0.888	64.8	0.263199	0.266892
2009	3	C	9	1.563	1.215	0.348	15.82	0.235	1.139	64.8	0.222649	0.206321
2009	3	C	9	0.124			7.59	0.001		64.8	0
2009	3	C	9	0.077			6.03	0.001		64.8	0
2009	3	C	9	5.012	3.936	1.076	23.73	0.827	3.801	64.8	0.214685	0.217574
2009	3	C	9	4.608	3.606	1.002	24.4	0.783	3.508	64.8	0.217448	0.223204
2009	3	C	9	0.589	0.43	0.159	12.17	0.093	0.406	64.8	0.269949	0.229064
2009	3	C	9	4.589	3.728	0.861	24.31	0.655	3.648	64.8	0.187623	0.17955
2009	3	C	9	3.749	2.845	0.904	22.29	0.528	2.667	64.8	0.241131	0.197975
2009	3	C	9	4.659	3.307	1.352	22.55	1.009	3.142	64.8	0.290191	0.321133
2009	3	C	9	5.145	4.372	0.773	25.02	0.612	4.225	64.8	0.150243	0.144852
2009	3	C	9	0.59	0.443	0.147	12.09	0.105	0.412	64.8	0.249153	0.254854
2009	3	C	9	4.446	3.236	1.21	21.82	0.767	3.099	64.8	0.272155	0.247499
2009	3	C	9	4.883	3.457	1.426	24.06	0.843	3.261	64.8	0.292034	0.25851
2009	3	C	9	1.164	0.889	0.275	15.55	0.176	0.808	64.8	0.236254	0.217822
2009	3	C	9	0.84	0.639	0.201	13.92	0.143	0.581	64.8	0.239286	0.246127
2009	3	C	9	0.459	0.332	0.127	11.47	0.089	0.306	64.8	0.276688	0.29085
2009	3	C	9	0.502	0.394	0.108	11.55	0.078	0.355	64.8	0.215139	0.219718
2009	3	C	9	0.246	0.207	0.039	9.08	0.047	0.198	64.8	0.158537	0.237374
2009	3	A	10	2.582	2.084	0.498	19.17	0.06	2.015	13	0.192874	0.0297767
2009	3	A	10	3.925	2.847	1.078	21.14	0.101	2.708	13	0.27465	0.0372969
2009	3	A	10	3.764	2.807	0.957	22.13	0.087	2.712	13	0.254251	0.0320796
2009	3	A	10	3.539	3.072	0.467	21.925	0.1	3.019	13	0.131958	0.0331236
2009	3	A	10	3.896	2.959	0.937	21.48	0.113	2.82	13	0.240503	0.0400709
2009	3	A	10	3.379	2.904	0.475	22.42	0.078	2.827	13	0.140574	0.0275911
2009	3	A	10	2.516	2.147	0.369	17.69	0.088	2.039	13	0.146661	0.0431584
2009	3	A	10	1.912	1.435	0.477	18.9	0.054	1.398	13	0.249477	0.0386266
2009	3	A	10	0.473	0.354	0.119	11.27	0.016	0.349	13	0.251586	0.0458453
2009	3	A	10	0.645	0.568	0.077	12.77	0.017	0.56	13	0.11938	0.0303571
2009	3	A	10	3.312	2.489	0.823	20.71	0.111	2.337	13	0.24849	0.0474968
2009	3	A	10	4.18	3.383	0.797	21.94	0.087	3.302	13	0.19067	0.0263477
2009	3	A	10	1.923	1.408	0.515	17.54	0.055	1.401	13	0.267811	0.0392577
2009	3	A	10	3.664	3.054	0.61	25.8	0.021	2.919	13	0.166485	0.00719424
2009	3	A	10	3.447	2.473	0.974	21.83	0.089	2.384	13	0.282565	0.0373322
2009	3	A	10	1.206	0.88	0.326	15.25	0.0026	0.87	13	0.270315	0.00298851
2009	3	A	10	0.175			7.71	0.001		13	0
2009	3	A	10	0.544	0.444	0.1	12.72	0.087	0.403	13	0.183824	0.215881
2009	3	A	10	4.202	3.176	1.026	20.84	0.058	3.024	13	0.244169	0.0191799
2009	3	A	10	4.013	3.153	0.86	22.49	0.068	2.872	13	0.214304	0.0236769
2009	3	A	10	3.977	3.129	0.848	21.75	0.048	2.97	13	0.213226	0.0161616
2009	3	A	10	3.752	3.095	0.657	22.69	0.066	3.015	13	0.175107	0.0218905
2009	3	A	10	3.878	2.843	1.035	22.48	0.073	2.729	13	0.26689	0.0267497
2009	3	A	10	2.322	1.768	0.554	18.86	0.057	1.666	13	0.238587	0.0342137
2009	3	A	10	4.481	3.197	1.284	23.54	0.111	3.069	13	0.286543	0.0361681
2009	3	A	10	0.061			5.69	0.001		13	0
2009	3	A	10	0.026			4.33	0.001		13	0
2009	3	A	10	5.435	3.924	1.511	24.31	0.143	3.783	13	0.278013	0.0378007
2009	3	A	10	7.939	5.875	2.064	27.37	0.194	5.678	13	0.259982	0.034167
2009	3	A	10	5.106	4.234	0.872	24.8	0.133	4.135	13	0.170779	0.0321644
2009	3	A	10	7.103	5.148	1.955	26.09	0.138	4.918	13	0.275236	0.0280602
2009	3	A	10	5.903	4.287	1.616	25.62	0.157	4.04	13	0.273759	0.0388614
2009	3	A	10	3.203	2.743	0.46	22.1	0.172	2.731	13	0.143615	0.0629806
2009	3	B	10	3.91	2.844	1.066	22.01	0.104	2.699	13	0.272634	0.0385328
2009	3	B	10	3.786	2.78	1.006	21.03	0.114	2.672	13	0.265716	0.0426647
2009	3	B	10	4.792	3.903	0.889	23.73	0.411	3.815	13	0.185518	0.107733
2009	3	B	10	4.123	3.059	1.064	22.35	0.125	2.859	13	0.258065	0.0437216
2009	3	B	10	5.488	4.001	1.487	25.12	0.191	3.773	13	0.270955	0.0506228
2009	3	B	10	4.445	3.527	0.918	22.65	0.118	3.35	13	0.206524	0.0352239
2009	3	B	10	4.913	3.4	1.513	24.73	0.144	3.226	13	0.307958	0.0446373
2009	3	B	10	3.646	2.879	0.767	21.8	0.084	2.65	13	0.210368	0.0316981
2009	3	B	10	4.565	3.274	1.291	23	0.098	3.108	13	0.282804	0.0315315
2009	3	B	10	2.396	1.85	0.546	18.75	0.062	1.772	13	0.22788	0.0349887
2009	3	B	10	0.776	0.579	0.197	12.38	0.02	0.573	13	0.253866	0.034904
2009	3	B	10	0.628	0.475	0.153	11.89	0.025	0.466	13	0.243631	0.0536481
2009	3	B	10	0.863	0.618	0.245	14.06	0.022	0.604	13	0.283893	0.0364238
2009	3	B	10	0.132			8.56	0.001		13	0
2009	3	B	10	0.919	0.707	0.212	14.19	0.038	0.731	13	0.230686	0.0519836
2009	3	B	10	2.158	1.602	0.556	18.56	0.051	1.548	13	0.257646	0.0329457
2009	3	B	10	2.158	1.711	0.447	18.89	0.042	1.627	13	0.207136	0.0258144
2009	3	B	10	2.587	2.11	0.477	18.66	0.021	1.9	13	0.184383	0.0110526
2009	3	B	10	0.596	0.498	0.098	12.09	0.013	0.45	13	0.16443	0.0288889
2009	3	B	10	2.526	2.052	0.474	18.1	0.033	1.954	13	0.187648	0.0168884
2009	3	B	10	1.201	0.961	0.24	15.27	0.014	0.91	13	0.199833	0.0153846
2009	3	B	10	2.662	2.168	0.494	18.63	0.057	2.046	13	0.185575	0.0278592
2009	3	B	10	1.499	1.187	0.312	15.99	0.001	1.133	13	0.208139	0.000882613
2009	3	B	10	0.865	0.7	0.165	13.64	0.07	0.069	13	0.190751	1.01449
2009	3	B	10	1.995	1.585	0.41	17.97	0.054	1.516	13	0.205514	0.0356201
2009	3	B	10	3.414	2.73	0.684	19.85	0.097	2.631	13	0.200351	0.0368681
2009	3	B	10	3.21	2.433	0.777	19.79	0.091	2.355	13	0.242056	0.0386412
2009	3	B	10	2.247	1.806	0.441	18.47	0.062	1.682	13	0.196262	0.0368609
2009	3	B	10	2.428	1.878	0.55	19.94	0.063	1.747	13	0.226524	0.0360618
2009	3	B	10	1.882	1.405	0.477	17.68	0.054	1.374	13	0.253454	0.0393013
2009	3	B	10	3.26	2.801	0.459	23.88	0.087	2.723	13	0.140798	0.0319501
2009	3	B	10	2.264	1.729	0.535	19.67	0.048	1.653	13	0.236307	0.0290381
2009	3	B	10	1.808	1.533	0.275	17.01	0.026	1.523	13	0.152102	0.0170716
2009	3	B	10	1.416	1.212	0.204	16.39	0.08	1.152	13	0.144068	0.0694444
2009	3	B	10	0.108			10.21	0.001		13	0
2009	3	B	10	0.869	0.665	0.204	13.49	0.012	0.646	13	0.234753	0.0185759
2009	3	B	10	1.577	1.167	0.41	16	0.046	1.162	13	0.259987	0.0395869
2009	3	B	10	2.307	1.898	0.409	19.88	0.06	1.821	13	0.177287	0.0329489
2009	3	B	10	2.396	2.005	0.391	18.71	0.074	2.02	13	0.163189	0.0366337
2009	3	B	10	2.492	1.809	0.683	18.82	0.079	1.773	13	0.274077	0.0445572
2009	3	B	10	1.561	1.125	0.436	17.19	0.042	1.15	13	0.279308	0.0365217
2009	3	B	10	1.917	1.485	0.432	17.79	0.059	1.5	13	0.225352	0.0393333
2009	3	B	10	2.081	1.606	0.475	18.24	0.072	1.605	13	0.228256	0.0448598
2009	3	B	10	1.674	1.443	0.231	17.37	0.043	1.3847	13	0.137993	0.0310537
2009	3	B	10	3.507	2.712	0.795	20	0.081	2.56	13	0.226689	0.0316406
2009	3	B	10	1.738	1.394	0.344	16.67	0.044	1.326	13	0.197929	0.0331825
2009	3	B	10	3.614	2.897	0.717	20.11	0.098	2.705	13	0.198395	0.0362292
2009	3	B	10	4.975	3.68	1.295	22.76	0.153	3.508	13	0.260302	0.0436146
2009	3	B	10	2.98	2.363	0.617	18.52	0.086	2.224	13	0.207047	0.0386691
2009	3	B	10	2.278	1.829	0.449	18.16	0.026	1.67	13	0.197103	0.0155689
2009	3	B	10	0.701	0.57	0.131	12.49	0.027	0.528	13	0.186876	0.0511364
2009	3	B	10	4.812	4.439	0.373	19.44	0.066	4.351	13	0.0775145	0.0151689
2009	3	B	10	5.502	1.847	3.655	24.98	1.781	0.175	13	0.664304	10.1771
2009	3	B	10	0.25			8.83	0.001		13	0
2009	3	C	10	0.79	0.608	0.182	12.82	0.012	0.589	13	0.23038	0.0203735
2009	3	C	10	2.028	1.521	0.507	17.68	0.06	1.472	13	0.25	0.0407609
2009	3	C	10	0.592	0.439	0.153	11.42	0.016	0.437	13	0.258446	0.0366133
2009	3	C	10	2.004	1.636	0.449	17.35	0.261	1.333	13	0.224052	0.195799
2009	3	C	10	4.757	3.472	1.285	24.69	0.102	3.304	13	0.270128	0.0308717
2009	3	C	10	3.022	2.285	0.737	19.01	0.08	2.184	13	0.243878	0.03663
2009	3	C	10	3.763	2.765	0.998	21.69	0.122	2.672	13	0.265214	0.0456587
2009	3	C	10	3.158	2.509	0.649	22.34	0.109	2.426	13	0.20551	0.0449299
2009	3	C	10	3.81	2.81	1	20.5	0.123	2.736	13	0.262467	0.0449561
2009	3	C	10	3.618	2.776	0.842	20.7	0.109	2.688	13	0.232725	0.0405506
2009	3	C	10	0.968	0.722	0.246	14.21	0.017	0.693	13	0.254132	0.024531
2009	3	C	10	1.844	1.44	0.404	16.96	0.071	1.393	13	0.219089	0.0509691
2009	3	C	10	0.243			8.91	0.001		13	0
2009	3	C	10	3.321	2.531	0.79	20.33	0.107	2.417	13	0.23788	0.0442698
2009	3	C	10	3.617	3.066	0.551	22.73	0.159	3.055	13	0.152336	0.0520458
2009	3	C	10	4.061	3.086	0.975	23.35	0.141	2.994	13	0.240089	0.0470942
2009	3	C	10	5.404	3.869	1.192	24.58	0.444	3.682	13	0.220577	0.120587
2009	3	C	10	4.257	3.137	1.12	22.19	0.131	2.975	13	0.263096	0.0440336
2009	3	C	10	7.088	4.839	2.249	28.46	0.245	4.685	13	0.317297	0.0522946
2009	3	C	10	3.722	2.672	1.05	22.63	0.109	2.511	13	0.282106	0.043409
2009	3	C	10	3.847	3.092	0.755	21.71	0.117	2.835	13	0.196257	0.0412698
2009	3	C	10	4.853	4.018	0.744	25.05	0.191	3.899	13	0.153307	0.0489869
2009	3	C	10	2.535	2.17	0.313	19.39	0.089	2.124	13	0.123471	0.0419021
2009	3	C	10	3.044	2.534	0.438	21.1	0.118	2.458	13	0.14389	0.0480065
2009	3	C	10	2.752	2.086	0.509	18.53	0.104	2.003	13	0.184956	0.0519221
2009	3	C	10	3.553	2.855	0.483	20.06	0.084	2.663	13	0.135941	0.0315434
2009	3	C	10	4.869	3.965	0.749	25.41	0.22	3.913	13	0.15383	0.0562228
2009	3	C	10	3.085	2.408	0.536	19.45	0.108	2.333	13	0.173744	0.0462923
2009	3	C	10	5.59	3.822	1.334	23.33	0.221	3.665	13	0.23864	0.0603001
2009	3	C	10	1.177	0.881	0.209	14.66	0.039	0.836	13	0.17757	0.0466507
2009	3	C	10	1.237	0.993	0.167	15.44	0.039	0.956	13	0.135004	0.040795
2009	3	C	10	0.942	0.693	0.153	13.93	0.031	0.668	13	0.16242	0.0464072
2009	3	C	10	0.825	0.653	0.172	13.46	0.664	0.025	13	0.208485	26.56
2009	3	C	10	3.657	3.098	0.559	23.01	0.113	3.014	13	0.152858	0.0374917
2009	3	C	10	4.631	3.85	0.781	24.24	0.193	3.842	13	0.168646	0.0502343
2009	3	C	10	4.993	3.574	1.419	23.14	0.115	3.48	13	0.284198	0.033046
2009	3	C	10	3.414	2.744	0.67	20.15	0.062	2.559	13	0.196251	0.0242282
2009	3	C	10	3.888	3.186	0.702	22.57	0.131	3.155	13	0.180556	0.0415214
2009	3	C	10	5.03	4.343	0.687	22.56	0.16	3.152	13	0.136581	0.0507614
2009	3	C	10	5.911	4.91	1.001	26.5	0.213	4.786	13	0.169345	0.0445048
2009	3	C	10	5.1	4.165	0.935	24.95	0.157	3.95	13	0.183333	0.0397468
2009	3	C	10	5.114	4.293	0.821	25.79	0.186	4.15	13	0.16054	0.0448193
2009	3	C	10	5.623	4.64	0.983	23.89	0.232	4.361	13	0.174818	0.0531988
2009	3	C	10	1.982	1.702	0.28	17.82	0.054	1.637	13	0.141271	0.0329872
2009	3	C	10	4.906	3.801	1.105	23.59	0.175	3.61	13	0.225234	0.0484765
2009	3	C	10	5.18	4.039	1.141	23.83	0.166	3.808	13	0.22027	0.0435924
2009	3	C	10	5.662	4.587	1.075	25.97	0.219	4.331	13	0.189862	0.0505657
2009	3	C	10	2.834	2.223	0.611	19.2	0.089	2.043	13	0.215596	0.0435634
2009	3	C	10	4.699	3.233	1.466	19.62	0.066	1.962	13	0.311981	0.0336391
2009	3	C	10	0.185			7.46			13	0
2009	3	C	10	0.077			5.94			13	0
2009	3	A	11	2.847	2.259	0.588	19.48	0.091	2.141	44.8	0.206533	0.0425035
2009	3	A	11	3.737	3.063	0.674	21.92	0.093	2.919	44.8	0.180359	0.0318602
2009	3	A	11	0.01			2.99	0.001		44.8	0
2009	3	A	11	0.1			6.01	0.001		44.8	0
2009	3	A	11	0.172			7.65	0.001		44.8	0
2009	3	A	11	0.042			4.76	0.001		44.8	0
2009	3	A	11	2.478	2.133	0.345	18.89	0.079	2.119	44.8	0.139225	0.0372817
2009	3	A	11	2.887	2.205	0.682	19.6	0.069	2.14	44.8	0.236231	0.032243
2009	3	A	11	1.181	0.863	0.318	14.52	0.022	0.835	44.8	0.269263	0.0263473
2009	3	A	11	0.02			3.51	0.001		44.8	0
2009	3	A	11	0.02			3.9	0.001		44.8	0
2009	3	A	11	0.019			3.69	0.001		44.8	0
2009	3	A	11	0.038			5.39	0.001		44.8	0
2009	3	A	11	0.015			3.46	0.001		44.8	0
2009	3	A	11	0.015			3.46	0.001		44.8	0
2009	3	A	11	3.519	3.063	0.456	19.96	0.064	2.462	44.8	0.129582	0.0259951
2009	3	A	11	2.897	2.535	0.362	21.296	0.041	2.484	44.8	0.124957	0.0165056
2009	3	A	11	1.684	1.52	0.164	17.65	0.046	1.508	44.8	0.0973872	0.030504
2009	3	A	11	0.074	0.047	0.027	6.3	0.001	0.044	44.8	0.364865	0.0227273
2009	3	A	11	3.519	3.063	0.456	21.61	0.054	3.048	44.8	0.129582	0.0177165
2009	3	A	11	1.777	1.571	0.206	17.21	0.06	1.552	44.8	0.115926	0.0386598
2009	3	A	11	2.681	2.12	0.561	19.96	0.046	2.067	44.8	0.20925	0.0222545
2009	3	A	11	1.019	0.896	0.123	15.65	0.02	0.886	44.8	0.120707	0.0225734
2009	3	A	11	2.355	1.965	0.39	19.48	0.034	1.944	44.8	0.165605	0.0174897
2009	3	A	11	0.02			3.89	0.001		44.8	0
2009	3	A	11	0.012			3.43	0.001		44.8	0
2009	3	A	11	0.032			4.11	0.001		44.8	0
2009	3	A	11	0.077			5.86	0.001		44.8	0
2009	3	A	11	0.027			4.12	0.001		44.8	0
2009	3	A	11	0.02			3.65	0.001		44.8	0
2009	3	A	11	0.008			2.99	0.001		44.8	0
2009	3	A	11	0.024			4.05	0.001		44.8	0
2009	3	A	11	2.004	1.616	0.388	17.83	0.032	1.538	44.8	0.193613	0.0208062
2009	3	A	11	1.857	1.614	0.243	18.15	0.039	1.554	44.8	0.130856	0.0250965
2009	3	A	11	0.988	0.84	0.148	12.94	0.016	0.811	44.8	0.149798	0.0197287
2009	3	A	11	1.737	1.44	0.297	17.69	0.069	1.407	44.8	0.170984	0.0490405
2009	3	A	11	1.89	1.63	0.26	17.15	0.02	1.577	44.8	0.137566	0.0126823
2009	3	A	11	1.261	1.055	0.206	16.5	0.003	1.009	44.8	0.163362	0.00297324
2009	3	A	11	1.636	1.493	0.143	16.04	0.004	1.466	44.8	0.0874083	0.00272851
2009	3	A	11	1.274	1.126	0.148	15.21	0.002	1.082	44.8	0.11617	0.00184843
2009	3	A	11	0.238	0.207	0.031	9.01	0.02	0.193	44.8	0.130252	0.103627
2009	3	A	11	0.04			4.49	0.001		44.8	0
2009	3	A	11	0.02			3.95	0.001		44.8	0
2009	3	A	11	0.007			3.22	0.001		44.8	0
2009	3	A	11	0.022			3.59	0.001		44.8	0
2009	3	A	11	0.002			3.16	0.001		44.8	0
2009	3	A	11	0.601	0.896	0.42	14.4	0.3	0.856	44.8	0.698835	0.350467
2009	3	A	11	2.739	2.203	0.536	19.21	0.079	2.116	44.8	0.195692	0.0373346
2009	3	A	11	2.007	1.638	0.369	18.18	0.036	1.541	44.8	0.183857	0.0233615
2009	3	A	11	3.5827	2.928	0.6547	23.06	0.1117	2.799	44.8	0.182739	0.0399071
2009	3	A	11	1.387	1.169	0.218	16.55	0.044	1.111	44.8	0.157174	0.039604
2009	3	A	11	3.472	2.87	0.602	23.62	0.119	2.79	44.8	0.173387	0.0426523
2009	3	A	11	0.13			7.61	0.001		44.8	0
2009	3	A	11	0.063			5.59	0.001		44.8	0
2009	3	A	11	0.016			4.54	0.001		44.8	0
2009	3	A	11	0.044			3.9	0.001		44.8	0
2009	3	A	11	0.002			4.57	0.001		44.8	0
2009	3	A	11	2.201	1.792	0.409	18.59	0.01	1.766	44.8	0.185825	0.00566251
2009	3	A	11	0.03			4.59	0.001		44.8	0
2009	3	A	11	0.028			4.17	0.001		44.8	0
2009	3	A	11	0.081			5.14	0.001		44.8	0
2009	3	A	11	0.008			2.24	0.001		44.8	0
2009	3	A	11	0.127			7.09	0.001		44.8	0
2009	3	A	11	0.067	0.059	0.008	6.01	0.001	0.058	44.8	0.119403	0.0172414
2009	3	A	11	0.03			4.31	0.001		44.8	0
2009	3	A	11	1.382	1.193	0.189	15.63	0.024	1.132	44.8	0.136758	0.0212014
2009	3	A	11	3.115	2.407	0.708	20.25	0.067	2.313	44.8	0.227287	0.0289667
2009	3	A	11	2.493	2.136	0.357	19.56	0.053	2.144	44.8	0.143201	0.0247201
2009	3	A	11	0.08			5.76	0.001		44.8	0
2009	3	A	11	0.02			4.66	0.001		44.8	0
2009	3	A	11	0.017			3.52	0.001		44.8	0
2009	3	A	11	4.435	3.805	0.63	23.54	0.034	3.771	44.8	0.142052	0.00901618
2009	3	A	11	2.675	1.987	0.688	19.62	0.075	1.912	44.8	0.257196	0.0392259
2009	3	A	11	0.885	0.771	0.114	14.4	0.025	0.751	44.8	0.128814	0.0332889
2009	3	A	11	0.594	0.509	0.085	12.43	0.014	0.496	44.8	0.143098	0.0282258
2009	3	A	11	0.453	0.335	0.118	10.77	0.012	0.326	44.8	0.260486	0.0368098
2009	3	A	11	0.075			6.24	0.001		44.8	0
2009	3	A	11	0.055			5.99	0.001		44.8	0
2009	3	A	11	0.04			4.67	0.001		44.8	0
2009	3	A	11	0.038			5.07	0.001		44.8	0
2009	3	A	11	0.03			4.6	0.001		44.8	0
2009	3	A	11	0.034			4.8	0.001		44.8	0
2009	3	A	11	0.024			4.13	0.001		44.8	0
2009	3	A	11	0.033			4.69	0.001		44.8	0
2009	3	A	11	5.156	4.099	1.057	27.59	0.105	4.014	44.8	0.205004	0.0261584
2009	3	A	11	3.75	2.737	1.013	21.61	0.064	2.645	44.8	0.270133	0.0241966
2009	3	A	11	3.302	2.839	0.463	22.64	0.061	2.813	44.8	0.140218	0.021685
2009	3	A	11	2.234	1.878	0.356	19.52	0.096	1.857	44.8	0.159355	0.0516963
2009	3	A	11	1.021	0.842	0.179	14.21	0.032	0.83	44.8	0.175318	0.0385542
2009	3	B	11	3.369	2.677	0.692	21.62	0.084	2.537	44.8	0.205402	0.03311
2009	3	B	11	1.633	1.358	0.275	16.21	0.03	1.278	44.8	0.168402	0.0234742
2009	3	B	11	3.628	2.956	0.672	21.85	0.112	2.876	44.8	0.185226	0.038943
2009	3	B	11	0.015			3.83	0.001		44.8	0
2009	3	B	11	2.254	1.876	0.378	18.05	0.065	1.776	44.8	0.167702	0.0365991
2009	3	B	11	4.062	3.362	0.7	22.06	0.138	3.272	44.8	0.172329	0.042176
2009	3	B	11	2.642	2.157	0.485	19.48	0.071	2.062	44.8	0.183573	0.0344326
2009	3	B	11	1.068	0.938	0.13	14.99	0.005	0.92	44.8	0.121723	0.00543478
2009	3	B	11	2.566	1.921	0.645	18.67	0.004	1.878	44.8	0.251364	0.00212993
2009	3	B	11	0.009			3.61	0.001		44.8	0
2009	3	B	11	0.004			3.57	0.001		44.8	0
2009	3	B	11	0.034			4.53	0.001		44.8	0
2009	3	B	11	0.043			5.78	0.001		44.8	0
2009	3	B	11	0.073			6.09	0.001		44.8	0
2009	3	B	11	0.02			5.93	0.001		44.8	0
2009	3	B	11	0.012			5.17	0.001		44.8	0
2009	3	B	11	0.023			3.73	0.001		44.8	0
2009	3	B	11	0.018			3.24	0.001		44.8	0
2009	3	B	11	0.02			4.18	0.001		44.8	0
2009	3	B	11	0.012			3.36	0.001		44.8	0
2009	3	B	11	0.012			3.9	0.001		44.8	0
2009	3	B	11	0.015			3.43	0.001		44.8	0
2009	3	B	11	0.006			2.96	0.001		44.8	0
2009	3	B	11	0.009			3.06	0.001		44.8	0
2009	3	B	11	0.014			3.79	0.001		44.8	0
2009	3	B	11	2.733	2.37	0.363	20.71	0.1	2.307	44.8	0.132821	0.0433463
2009	3	B	11	3.558	2.547	1.011	22.31	0.072	2.358	44.8	0.284148	0.0305344
2009	3	B	11	3.62	3.041	0.579	22.5	0.068	2.927	44.8	0.159945	0.023232
2009	3	B	11	4.491	3.721	0.77	23.58	0.124	3.393	44.8	0.171454	0.0365458
2009	3	B	11	4.188	3.509	0.679	22.36	0.041	3.545	44.8	0.16213	0.0115656
2009	3	B	11	4.245	3.414	0.831	22.54	0.118	3.264	44.8	0.19576	0.036152
2009	3	B	11	1.837	1.583	0.254	17.13	0.007	1.513	44.8	0.138269	0.00462657
2009	3	B	11	2.278	1.94	0.338	17.95	0.009	1.844	44.8	0.148376	0.00488069
2009	3	B	11	1.687	1.45	0.237	16.25	0.02	1.35	44.8	0.140486	0.0148148
2009	3	B	11	0.01			3.09	0.001		44.8	0
2009	3	B	11	0.024			4.08	0.001		44.8	0
2009	3	B	11	0.005			3.08	0.001		44.8	0
2009	3	B	11	0.085			5.48	0.001		44.8	0
2009	3	B	11	0.023			4.59	0.001		44.8	0
2009	3	B	11	0.046			4.79	0.001		44.8	0
2009	3	B	11	0.024			4.29	0.001		44.8	0
2009	3	B	11	0.007			3.75	0.001		44.8	0
2009	3	B	11	0.039			4.86	0.001		44.8	0
2009	3	B	11	0.046			4.61	0.001		44.8	0
2009	3	B	11	0.03			3.67	0.001		44.8	0
2009	3	B	11	0.008			2.87	0.001		44.8	0
2009	3	B	11	0.039			4.78	0.001		44.8	0
2009	3	B	11	0.018			3.48	0.001		44.8	0
2009	3	B	11	0.046			4.95	0.001		44.8	0
2009	3	B	11	0.06			5.53	0.001		44.8	0
2009	3	B	11	0.028			3.74	0.001		44.8	0
2009	3	B	11	0.023			3.94	0.001		44.8	0
2009	3	B	11	0.007			2.45	0.001		44.8	0
2009	3	B	11	0.245			8.88	0.001		44.8	0
2009	3	B	11	0.091			7.7	0.001		44.8	0
2009	3	B	11	0.161			7.77	0.001		44.8	0
2009	3	B	11	0.098			6.2	0.001		44.8	0
2009	3	B	11	0.089			6.61	0.001		44.8	0
2009	3	B	11	0.055			5.01	0.001		44.8	0
2009	3	B	11	0.032			5.1	0.001		44.8	0
2009	3	B	11	0.019			3.51	0.001		44.8	0
2009	3	B	11	0.013			3.15	0.001		44.8	0
2009	3	B	11	0.035			4.44	0.001		44.8	0
2009	3	B	11	0.019			3.43	0.001		44.8	0
2009	3	B	11	0.01			3.18	0.001		44.8	0
2009	3	B	11	0.011			3.35	0.001		44.8	0
2009	3	B	11	0.008			3.31	0.001		44.8	0
2009	3	B	11	0.006			2.47	0.001		44.8	0
2009	3	B	11	0.015			3.38	0.001		44.8	0
2009	3	B	11	0.009			2.72	0.001		44.8	0
2009	3	B	11	0.025			3.81	0.001		44.8	0
2009	3	B	11	0.028			4.01	0.001		44.8	0
2009	3	B	11	0.02			3.77	0.001		44.8	0
2009	3	B	11	0.033			4.2	0.001		44.8	0
2009	3	B	11	0.047			4.92	0.001		44.8	0
2009	3	B	11	0.009			2.49	0.001		44.8	0
2009	3	B	11	0.025			2.65	0.001		44.8	0
2009	3	B	11	0.007			3.25	0.001		44.8	0
2009	3	B	11	0.008			3.34	0.001		44.8	0
2009	3	B	11	0.013			2.51	0.001		44.8	0
2009	3	B	11	0.005			3.65	0.001		44.8	0
2009	3	B	11	0.021			3.74	0.001		44.8	0
2009	3	B	11	0.027			3.38	0.001		44.8	0
2009	3	B	11	0.017			3.22	0.001		44.8	0
2009	3	B	11	0.016			4.49	0.001		44.8	0
2009	3	B	11	0.025			3.43	0.001		44.8	0
2009	3	B	11	0.013			3.57	0.001		44.8	0
2009	3	B	11	0.02			4.95	0.001		44.8	0
2009	3	B	11	0.051			4.16	0.001		44.8	0
2009	3	B	11	0.03			5.22	0.001		44.8	0
2009	3	B	11	0.05			4.94	0.001		44.8	0
2009	3	B	11	0.022			4.4	0.001		44.8	0
2009	3	B	11	0.046			4.39	0.001		44.8	0
2009	3	B	11	0.039			3.72	0.001		44.8	0
2009	3	B	11	0.025			3.79	0.001		44.8	0
2009	3	B	11	0.0022			3.44	0.001		44.8	0
2009	3	B	11	0.028			4.02	0.001		44.8	0
2009	3	B	11	0.029			4.06	0.001		44.8	0
2009	3	B	11	4.118	3.388	0.73	23.06	0.147	3.351	44.8	0.177271	0.0438675
2009	3	B	11	1.999	1.68	0.319	19.51	0.042	1.648	44.8	0.15958	0.0254854
2009	3	B	11	3.615	2.92	0.695	22.03	0.119	2.871	44.8	0.192254	0.041449
2009	3	B	11	4.028	3.119	0.909	22.94	0.097	3.034	44.8	0.22567	0.031971
2009	3	B	11	4.033	2.941	1.092	21.93	0.133	2.847	44.8	0.270766	0.0467158
2009	3	B	11	3.556	2.86	0.696	20.72	0.11	2.802	44.8	0.195726	0.0392577
2009	3	B	11	2.787	2.102	0.685	18.38	0.08	2.021	44.8	0.245784	0.0395844
2009	3	B	11	2.502	2.075	0.427	19.62	0.074	2.049	44.8	0.170663	0.0361152
2009	3	B	11	2.471	1.882	0.589	18.27	0.086	1.814	44.8	0.238365	0.047409
2009	3	B	11	4.594	3.322	1.272	23.26	0.109	3.221	44.8	0.276883	0.0338404
2009	3	B	11	2.308	1.814	0.494	18.27	0.055	1.74	44.8	0.214038	0.0316092
2009	3	B	11	4.338	3.192	1.146	22.14	0.126	3.118	44.8	0.264177	0.0404105
2009	3	B	11	7.08	5.244	1.836	24.85	0.167	5.089	44.8	0.259322	0.0328159
2009	3	B	11	3.649	2.61	1.039	21.28	0.097	2.548	44.8	0.284736	0.0380691
2009	3	B	11	1.4	1.068	0.332	15.51	0.01	1.021	44.8	0.237143	0.00979432
2009	3	B	11	3.279	2.215	1.064	19.76	0.058	2.177	44.8	0.324489	0.0266422
2009	3	B	11	2.692	1.971	0.721	18.53	0.006	1.906	44.8	0.267831	0.00314795
2009	3	B	11	0.127			7.04	0.001		44.8	0
2009	3	B	11	0.127			7.05	0.001		44.8	0
2009	3	B	11	0.04			4.84	0.001		44.8	0
2009	3	B	11	0.093			6.34	0.001		44.8	0
2009	3	B	11	0.075			6.05	0.001		44.8	0
2009	3	B	11	0.052			5.6	0.001		44.8	0
2009	3	B	11	0.064			5.5	0.001		44.8	0
2009	3	B	11	0.079			6.19	0.001		44.8	0
2009	3	B	11	0.046			4.63	0.001		44.8	0
2009	3	B	11	0.033			3.97	0.001		44.8	0
2009	3	B	11	0.033			4.42	0.001		44.8	0
2009	3	B	11	0.061			5.63	0.001		44.8	0
2009	3	B	11	0.045			5.03	0.001		44.8	0
2009	3	B	11	0.05			4.67	0.001		44.8	0
2009	3	B	11	0.055			5.2	0.001		44.8	0
2009	3	B	11	0.043			4.73	0.001		44.8	0
2009	3	B	11	0.03			4.04	0.001		44.8	0
2009	3	B	11	0.025			3.81	0.001		44.8	0
2009	3	B	11	0.017			3.12	0.001		44.8	0
2009	3	B	11	0.014			3.28	0.001		44.8	0
2009	3	B	11	2.776	2.315	0.461	20.58	0.075	2.254	44.8	0.166066	0.0332742
2009	3	B	11	1.954	1.643	0.311	17.36	0.041	1.583	44.8	0.159161	0.0259002
2009	3	B	11	2.01	1.669	0.341	17.78	0.04	1.615	44.8	0.169652	0.0247678
2009	3	B	11	2.184	1.876	0.308	18.59	0.049	1.784	44.8	0.141026	0.0274664
2009	3	B	11	2.949	2.442	0.507	20.41	0.07	2.32	44.8	0.171923	0.0301724
2009	3	B	11	2.304	1.919	0.385	19.43	0.04	1.851	44.8	0.167101	0.0216099
2009	3	B	11	0.12			6.47	0.001		44.8	0
2009	3	B	11	0.04			4.14	0.001		44.8	0
2009	3	B	11	0.125			7.05	0.001		44.8	0
2009	3	B	11	0.08			5.47	0.001		44.8	0
2009	3	B	11	0.028			3.83	0.001		44.8	0
2009	3	B	11	0.024			4.32	0.001		44.8	0
2009	3	B	11	0.112			6.75	0.001		44.8	0
2009	3	B	11	0.059			5.43	0.001		44.8	0
2009	3	B	11	0.018			3.25	0.001		44.8	0
2009	3	B	11	0.111			6.93	0.001		44.8	0
2009	3	B	11	0.049			5.02	0.001		44.8	0
2009	3	B	11	0.068			5.69	0.001		44.8	0
2009	3	B	11	0.041			5.37	0.001		44.8	0
2009	3	B	11	0.053			5.61	0.001		44.8	0
2009	3	B	11	0.039			5.84	0.001		44.8	0
2009	3	B	11	0.044			4.76	0.001		44.8	0
2009	3	B	11	0.033			4.56	0.001		44.8	0
2009	3	B	11	0.019			4.24	0.001		44.8	0
2009	3	B	11	0.022			4.03	0.001		44.8	0
2009	3	B	11	0.067			5.85	0.001		44.8	0
2009	3	B	11	0.055			5.54	0.001		44.8	0
2009	3	B	11	0.028			4.21	0.001		44.8	0
2009	3	B	11	0.013			3.86	0.001		44.8	0
2009	3	B	11	0.025			4.12	0.001		44.8	0
2009	3	B	11	0.029			4.11	0.001		44.8	0
2009	3	B	11	0.034			4.52	0.001		44.8	0
2009	3	B	11	0.007			3.87	0.001		44.8	0
2009	3	B	11	0.035			4.78	0.001		44.8	0
2009	3	B	11	0.025			4.78	0.001		44.8	0
2009	3	B	11	0.049			5.23	0.001		44.8	0
2009	3	B	11	0.05			6.78	0.001		44.8	0
2009	3	B	11	0.022			4.24	0.001		44.8	0
2009	3	B	11	0.021			4.43	0.001		44.8	0
2009	3	B	11	0.022			4.07	0.001		44.8	0
2009	3	B	11	0.024			4.31	0.001		44.8	0
2009	3	B	11	0.03			4.62	0.001		44.8	0
2009	3	B	11	0.011			3.57	0.001		44.8	0
2009	3	B	11	0.018			3.96	0.001		44.8	0
2009	3	B	11	0.02			4.19	0.001		44.8	0
2009	3	B	11	0.009			3.17	0.001		44.8	0
2009	3	B	11	0.005			3.45	0.001		44.8	0
2009	3	B	11	0.008			3.59	0.001		44.8	0
2009	3	B	11	0.005			3.67	0.001		44.8	0
2009	3	B	11	0.007			3.21	0.001		44.8	0
2009	3	B	11	3.571	2.677	0.894	20.9	0.08	2.561	44.8	0.25035	0.0312378
2009	3	B	11	2.256	1.954	0.302	18.95	0.039	1.932	44.8	0.133865	0.0201863
2009	3	B	11	2.329	1.9	0.429	19.51	0.06	1.86	44.8	0.184199	0.0322581
2009	3	B	11	2.798	2.364	0.434	20.38	0.056	2.34	44.8	0.155111	0.0239316
2009	3	B	11	2.303	2.058	0.245	18.74	0.044	2.034	44.8	0.106383	0.0216323
2009	3	B	11	0.07			5.99	0.001		44.8	0
2009	3	B	11	0.048			5.95	0.001		44.8	0
2009	3	B	11	0.07			6.01	0.001		44.8	0
2009	3	B	11	0.034			3.98	0.001		44.8	0
2009	3	B	11	0.054			5.11	0.001		44.8	0
2009	3	B	11	0.049			5.25	0.001		44.8	0
2009	3	B	11	0.009			2.73	0.001		44.8	0
2009	3	B	11	0.019			3.24	0.001		44.8	0
2009	3	B	11	0.009			2.96	0.001		44.8	0
2009	3	B	11	3.225	2.691	0.534	21.46	0.06	2.379	44.8	0.165581	0.0252207
2009	3	B	11	3.7	3.073	0.627	21.56	0.078	3.042	44.8	0.169459	0.025641
2009	3	B	11	4.498	3.706	0.792	22.94	0.122	3.684	44.8	0.176078	0.0331162
2009	3	B	11	3.572	2.916	0.656	21.37	0.08	2.883	44.8	0.183651	0.0277489
2009	3	B	11	3.118	2.703	0.415	19.26	0.05	2.672	44.8	0.133098	0.0187126
2009	3	B	11	2.513	2.128	0.385	19.74	0.05	2.108	44.8	0.153203	0.0237192
2009	3	B	11	2.448	1.848	0.6	19.04	0.038	1.785	44.8	0.245098	0.0212885
2009	3	B	11	0.091			7.14	0.001		44.8	0
2009	3	B	11	0.052			6.07	0.001		44.8	0
2009	3	B	11	0.044			5.56	0.001		44.8	0
2009	3	B	11	0.01			2.52	0.001		44.8	0
2009	3	B	11	0.041			4.4	0.001		44.8	0
2009	3	B	11	0.033			4.09	0.001		44.8	0
2009	3	B	11	0.032			4.31	0.001		44.8	0
2009	3	B	11	0.033			4.21	0.001		44.8	0
2009	3	B	11	0.022			3.64	0.001		44.8	0
2009	3	B	11	0.05			4.86	0.001		44.8	0
2009	3	B	11	0.006			2.5	0.001		44.8	0
2009	3	B	11	0.014			3.11	0.001		44.8	0
2009	3	B	11	0.031			3.9	0.001		44.8	0
2009	3	B	11	0.035			4.95	0.001		44.8	0
2009	3	B	11	0.025			4.19	0.001		44.8	0
2009	3	B	11	0.022			3.33	0.001		44.8	0
2009	3	B	11	0.009			2.91	0.001		44.8	0
2009	3	B	11	0.013			3.44	0.001		44.8	0
2009	3	B	11	0.005			2.84	0.001		44.8	0
2009	3	B	11	3.432	2.824	0.608	20.41	0.076	2.784	44.8	0.177156	0.0272989
2009	3	B	11	3.068	2.293	0.775	20.86	0.192	2.251	44.8	0.252608	0.0852954
2009	3	B	11	3.748	3.163	0.585	21.86	0.081	3.129	44.8	0.156083	0.0258869
2009	3	B	11	0.04			4.72	0.01		44.8	0
2009	3	C	11	1.293	0.997	0.296	15.44	0.018	0.976	44.8	0.228925	0.0184426
2009	3	C	11	1.654	1.393	0.261	16.61	0.025	1.371	44.8	0.157799	0.0182349
2009	3	C	11	0.03			5.32	0.001		44.8	0
2009	3	C	11	0.036			4.86	0.001		44.8	0
2009	3	C	11	0.046			5.51	0.001		44.8	0
2009	3	C	11	4.831	4.026	0.805	23.59	0.142	3.916	44.8	0.166632	0.0362615
2009	3	C	11	4.966	3.963	1.003	24.82	0.144	3.783	44.8	0.201973	0.038065
2009	3	C	11	3.832	3.145	0.687	22.57	0.119	3.049	44.8	0.17928	0.0390292
2009	3	C	11	0.09			5.41	0.001		44.8	0
2009	3	C	11	0.043			4.54	0.001		44.8	0
2009	3	C	11	0.041			4.63	0.001		44.8	0
2009	3	C	11	0.032			4.82	0.001		44.8	0
2009	3	C	11	0.032			4.14	0.001		44.8	0
2009	3	C	11	0.025			3.58	0.001		44.8	0
2009	3	C	11	0.068			5.41	0.001		44.8	0
2009	3	C	11	0.014			3.23	0.001		44.8	0
2009	3	C	11	0.025			3.79	0.001		44.8	0
2009	3	C	11	0.018			4.09	0.001		44.8	0
2009	3	C	11	0.014			2.84	0.001		44.8	0
2009	3	C	11	3.667	3.003	0.664	22.63	0.117	2.909	44.8	0.181074	0.04022
2009	3	C	11	4.937	3.794	1.143	24.86	0.29	3.581	44.8	0.231517	0.080983
2009	3	C	11	3.871	3.171	0.7	23.15	0.123	3.074	44.8	0.180832	0.040013
2009	3	C	11	4.438	3.719	0.719	22.62	0.131	3.614	44.8	0.16201	0.0362479
2009	3	C	11	0.08			6.49	0.001		44.8	0
2009	3	C	11	0.066			5.67	0.001		44.8	0
2009	3	C	11	0.179			7.68	0.001		44.8	0
2009	3	C	11	0.173			8.03	0.001		44.8	0
2009	3	C	11	0.072			5.71	0.001		44.8	0
2009	3	C	11	0.046			5.25	0.001		44.8	0
2009	3	C	11	0.027			4.04	0.001		44.8	0
2009	3	C	11	0.004			3.33	0.001		44.8	0
2009	3	C	11	0.263			9.48	0.001		44.8	0
2009	3	C	11	0.058			5.43	0.001		44.8	0
2009	3	C	11	0.003			2.76	0.001		44.8	0
2009	3	C	11	2.676	2.35	0.326	20.26	0.021	2.333	44.8	0.121824	0.00900129
2009	3	C	11	1.593	1.419	0.174	16.2	0.016	1.394	44.8	0.109228	0.0114778
2009	3	C	11	0.269	0.267	0.002	10.14	0.001	0.254	44.8	0.00743494	0.00393701
2009	3	C	11	0.02			4.53	0.001		44.8	0	#DIV/0!
2009	3	C	11	0.084			5.95	0.001		44.8	0	#DIV/0!
2009	3	C	11	0.064			5.4	0.001		44.8	0	#DIV/0!
2009	3	C	11	0.024			3.8	0.001		44.8	0	#DIV/0!
2009	3	C	11	0.02			3.7	0.001		44.8	0	#DIV/0!
2009	3	C	11	0.087			6.02	0.001		44.8	0	#DIV/0!
2009	3	C	11	0.03			4.49	0.001		44.8	0	#DIV/0!
2009	3	C	11	0.079			5.76	0.001		44.8	0	#DIV/0!
2009	3	C	11	0.084			6.19	0.001		44.8	0	#DIV/0!
2009	3	C	11	0.053			4.49	0.001		44.8	0	#DIV/0!
2009	3	C	11	0.023			6.13	0.001		44.8	0	#DIV/0!
2009	3	C	11	0.014			5.39	0.001		44.8	0	#DIV/0!
2009	3	C	11	0.026			3.61	0.001		44.8	0	#DIV/0!
2009	3	C	11	0.013			3.7	0.001		44.8	0	#DIV/0!
2009	3	C	11	0.015			6.12	0.001		44.8	0	#DIV/0!
2009	3	C	11	0.018			4.54	0.001		44.8	0	#DIV/0!
2009	3	C	11	0.013			5.73	0.001		44.8	0	#DIV/0!
2009	3	C	11	0.006			5.78	0.001		44.8	0	#DIV/0!
2009	3	C	11	3.645	2.881	0.764	20.76	0.093	2.81	44.8	0.209602	0.0330961
2009	3	C	11	2.544	2.247	0.297	20.45	0.04	2.23	44.8	0.116745	0.0179372
2009	3	C	11	2.705	2.425	0.28	18.44	0.055	2.399	44.8	0.103512	0.0229262
2009	3	C	11	2.644	2.151	0.493	17.9	0.05	2.082	44.8	0.18646	0.0240154
2009	3	C	11	0.325	0.272	0.053	10.65	0.007	0.268	44.8	0.163077	0.0261194
2009	3	C	11	0.053			5.6	0.001		44.8	0
2009	3	C	11	0.09			6.21	0.001		44.8	0
2009	3	C	11	0.169			8.02	0.001		44.8	0
2009	3	C	11	0.059			5.21	0.001		44.8	0
2009	3	C	11	0.012			3.13	0.001		44.8	0
2009	3	C	11	0.02			3.76	0.001		44.8	0
2009	3	C	11	0.021			4.19	0.001		44.8	0
2009	3	C	11	0.027			3.67	0.001		44.8	0
2009	3	C	11	0.026			4.55	0.001		44.8	0
2009	3	C	11	0.022			3.41	0.001		44.8	0
2009	3	C	11	0.006			2.2	0.001		44.8	0
2009	3	C	11	0.035			4.27	0.001		44.8	0
2009	3	C	11	0.022			3.64	0.001		44.8	0
2009	3	C	11	0.058			5.76	0.001		44.8	0
2009	3	C	11	0.009			4.96	0.001		44.8	0
2009	3	C	11	0.047			5.35	0.001		44.8	0
2009	3	C	11	0.043			4.72	0.001		44.8	0
2009	3	C	11	0.049			4.67	0.001		44.8	0
2009	3	C	11	0.04			4.6	0.001		44.8	0
2009	3	C	11	0.031			4.08	0.001		44.8	0
2009	3	C	11	0.029			3.99	0.001		44.8	0
2009	3	C	11	0.032			4.17	0.001		44.8	0
2009	3	C	11	0.03			3.91	0.001		44.8	0
2009	3	C	11	0.015			3.12	0.001		44.8	0
2009	3	C	11	0.033			2.92	0.001		44.8	0
2009	3	C	11	0.007			3.03	0.001		44.8	0
2009	3	C	11	3.282	2.629	0.653	19.48	0.054	2.606	44.8	0.198964	0.0207214
2009	3	C	11	0.02			3.07	0.001		44.8	0
2009	3	C	11	0.048			4.68	0.001		44.8	0
2009	3	C	11	0.014			3.45	0.001		44.8	0
2009	3	C	11	0.01			3.14	0.001		44.8	0
2009	3	C	11	0.03			4.01	0.001		44.8	0
2009	3	C	11	0.037			4.61	0.001		44.8	0
2009	3	C	11	0.067			5.54	0.001		44.8	0
2009	3	C	11	0.014			3.33	0.001		44.8	0
2009	3	C	11	0.032			4.58	0.001		44.8	0
2009	3	C	11	0.039			4.63	0.001		44.8	0
2009	3	C	11	0.04			4.31	0.001		44.8	0
2009	3	C	11	0.02			3.86	0.001		44.8	0
2009	3	C	11	5.135	3.994	1.141	24.06	0.148	3.884	44.8	0.222201	0.038105
2009	3	C	11	3.936	3.536	0.4	21.77	0.01	3.401	44.8	0.101626	0.00294031
2009	3	C	11	4.412	3.461	0.951	22.7	0.086	3.342	44.8	0.215549	0.0257331
2009	3	C	11	1.902	1.692	0.21	17.92	0.01	1.658	44.8	0.11041	0.00603136
2009	3	C	11	0.206			8.49	0.001	0.202	44.8	0	0.0049505
2009	3	C	11	0.262			9.53	0.001	0.217	44.8	0	0.00460829
2009	3	C	11	0.01			3.22	0.001		44.8	0
2009	3	C	11	0.013			3.3	0.001		44.8	0
2009	3	C	11	0.021			3.54	0.001		44.8	0
2009	3	C	11	0.054			5.03	0.001		44.8	0
2009	3	C	11	0.046			5.06	0.001		44.8	0
2009	3	C	11	0.027			4.52	0.001		44.8	0
2009	3	C	11	0.091			6.47	0.001		44.8	0
2009	3	C	11	0.024			4.18	0.001		44.8	0
2009	3	C	11	0.113			6.93	0.001		44.8	0
2009	3	C	11	0.026			4.17	0.001		44.8	0
2009	3	C	11	0.049			4.8	0.001		44.8	0
2009	3	C	11	0.015			3.55	0.001		44.8	0
2009	3	C	11	0.017			3.89	0.001		44.8	0
2009	3	C	11	0.012			3.32	0.001		44.8	0
2009	3	C	11	0.025			4.01	0.001		44.8	0
2009	3	C	11	0.026			3.84	0.001		44.8	0
2009	3	C	11	0.037			5.24	0.001		44.8	0
2009	3	C	11	0.058			5.24	0.001		44.8	0
2009	3	C	11	0.028			4.05	0.001		44.8	0
2009	3	C	11	0.031			4.08	0.001		44.8	0
2009	3	C	11	0.052			5.59	0.001		44.8	0
2009	3	C	11	0.027			3.69	0.001		44.8	0
2009	3	C	11	0.024			4	0.001		44.8	0
2009	3	C	11	0.02			3.9	0.001		44.8	0
2009	3	C	11	0.041			4.81	0.001		44.8	0
2009	3	C	11	0.078			5.62	0.001		44.8	0
2009	3	C	11	0.04			4.51	0.001		44.8	0
2009	3	C	11	0.034			4.46	0.001		44.8	0
2009	3	C	11	0.012			3.21	0.001		44.8	0
2009	3	C	11	0.004			2.6	0.001		44.8	0
2009	3	C	11	0.039			4.24	0.001		44.8	0
2009	3	C	11	0.018			3.23	0.001		44.8	0
2009	3	C	11	0.053			5.32	0.001		44.8	0
2009	3	C	11	0.021			3.48	0.001		44.8	0
2009	3	C	11	0.004			2.96	0.001		44.8	0
2009	3	C	11	0.021			3.81	0.001		44.8	0
2009	3	C	11	0.039			4.68	0.001		44.8	0
2009	3	C	11	0.018			3.77	0.001		44.8	0
2009	3	C	11	4.589	3.786	0.803	24.03	0.134	3.737	44.8	0.174984	0.0358576
2009	3	C	11	4.795	3.466	1.329	22.72	0.15	3.342	44.8	0.277164	0.0448833
2009	3	C	11	4.501	3.452	1.049	21.64	0.114	3.357	44.8	0.233059	0.0339589
[truncated: 4,774 more rows]

## Sheet: histogram data
	Number of shell
Shell lenght	March_Area_A	Shell lenght	March_Area_B	Shell lenght	March_Area_B	Shell lenght	April_Area_A	Shell lenght	April_Area_B	Shell lenght	April_Area_C	Shell lenght	May_Area_A	Shell lenght	May_Area_B	Shell lenght	May_Area_C	Shell lenght	June_Area_A	Shell lenght	June_Area_B	Shell lenght	June_Area_C	Shell lenght	July_Area_A	Shell lenght	July_Area_B	Shell lenght	July_Area_C	Shell lenght	August_Area_A	Shell lenght	August_Area_B	Shell lenght	August_Area_C	Shell lenght	September_Area_A	Shell lenght	September_Area_B	Shell lenght	September_Area_C	Shell lenght	October_Area_A	Shell lenght	October_Area_B	Shell lenght	October_Area_C	Shell Lenght	November_AreaA
1		1		1		1		1		1		1		1		1		1		1		1		1		1		1		1		1		1		1		1		1		1		1		1		1
2		2		2	1	2		2		2		2		2		2		2	1	2		2		2		2		2		2		2		2		2		2		2		2		2		2		2	3
3	6	3	5	3	3	3		3		3		3		3		3		3		3	2	3		3		3		3		3		3		3		3		3		3		3		3		3		3	14
4	4	4	7	4	5	4	2	4	1	4	1	4		4		4		4	3	4	2	4		4		4		4		4		4		4		4		4		4		4	1	4		4		4	16
5	3	5	3	5	3	5	5	5	1	5	2	5		5	2	5	1	5	5	5		5	1	5		5	1	5		5		5	1	5	1	5	1	5		5		5	1	5		5	1	5	7
6	4	6	3	6	1	6	6	6	10	6	2	6		6	1	6	1	6	4	6		6	1	6	2	6	3	6	2	6		6	1	6	1	6		6		6	1	6		6		6		6	4
7	3	7	2	7	2	7	4	7	3	7	5	7		7	7	7	2	7		7	2	7	2	7	1	7	2	7		7	2	7		7		7	4	7		7	1	7	1	7		7	1	7	3
8	3	8	4	8		8	3	8	2	8	4	8		8	3	8	1	8	2	8	2	8	2	8	1	8	8	8	2	8		8		8	2	8		8		8	1	8		8	2	8	2	8
9	6	9	5	9	2	9	4	9	9	9	10	9		9	4	9	1	9	1	9	4	9	3	9	2	9	2	9		9	2	9	1	9	3	9	1	9	1	9	1	9		9		9		9	1
10	2	10	9	10	4	10		10	6	10	4	10	1	10	5	10	2	10	2	10	6	10	3	10	2	10	10	10		10	1	10	3	10	2	10	3	10	3	10	2	10		10	1	10		10	1
11	2	11	6	11	2	11	1	11	2	11	2	11	2	11	2	11		11	2	11	6	11	4	11		11	6	11		11	1	11	4	11		11	1	11	7	11	3	11	1	11	1	11	1	11
12		12	4	12		12	1	12	11	12	1	12		12	6	12		12	1	12	3	12	2	12	4	12	9	12	2	12	1	12	3	12	4	12	3	12	1	12	2	12	2	12	3	12	1	12	2
13	1	13	3	13	3	13	1	13	12	13		13	2	13	5	13	1	13	1	13	3	13	3	13		13	11	13		13	1	13	3	13	1	13		13	7	13	1	13		13	2	13	2	13
14		14	2	14	4	14		14	3	14	1	14		14	3	14	2	14	2	14	2	14	1	14		14	9	14	1	14	2	14	8	14	2	14		14	5	14		14		14	2	14	2	14	4
15	1	15	1	15	7	15	1	15	4	15	1	15		15	2	15	2	15	2	15	1	15	5	15	1	15	7	15	2	15	1	15	8	15	8	15	1	15	3	15	3	15	1	15	2	15	1	15	3
16	3	16	1	16	1	16	2	16	2	16	4	16		16	2	16	6	16	3	16	3	16	3	16	3	16	3	16	2	16	1	16	6	16		16	2	16	8	16		16		16	3	16	1	16	3
17	7	17	5	17	2	17	7	17	5	17	5	17	3	17	3	17	2	17	6	17	2	17	1	17	1	17	1	17	2	17	2	17	5	17	3	17	1	17	11	17		17	2	17	6	17	3	17	5
18	10	18	9	18	7	18	3	18	4	18	1	18	4	18	3	18	6	18	5	18	2	18	2	18	10	18	5	18	3	18	2	18	6	18	2	18		18	10	18	2	18	2	18	12	18	1	18	4
19	5	19	9	19	8	19	11	19	16	19	7	19	3	19	4	19	7	19	6	19	5	19	8	19	7	19	6	19	1	19	7	19	8	19	4	19	2	19	3	19	3	19	1	19	6	19	5	19	9
20	7	20	14	20	4	20	8	20	14	20	6	20	7	20	2	20	2	20	7	20	1	20	3	20	4	20		20	7	20	4	20	1	20	4	20	8	20	13	20		20	1	20	2	20	5	20	1
21	6	21	2	21	13	21	10	21	15	21	8	21	4	21	4	21		21	7	21	1	21	5	21	5	21	2	21	9	21	8	21	4	21	5	21	8	21	10	21	3	21	6	21	2	21	3	21	4
22	3	22	3	22	6	22	5	22	6	22	6	22	5	22	1	22		22	5	22	1	22	4	22	3	22	2	22	4	22	4	22	2	22	3	22		22	6	22	6	22	6	22	4	22	6	22	1
23	4	23	1	23	6	23	4	23	4	23	3	23	5	23	1	23		23	1	23		23	5	23	3	23	2	23	5	23	2	23		23		23	3	23	4	23	1	23	1	23	3	23	7	23	3
24	1	24	1	24	5	24	1	24		24	3	24	1	24	1	24		24	1	24		24	6	24	1	24		24	4	24		24		24		24	1	24	2	24	3	24	2	24	2	24	4	24
25		25		25	2	25	1	25		25	3	25		25	1	25		25	1	25		25	1	25	1	25		25		25		25		25		25		25	1	25	3	25	2	25	1	25	4	25
26		26		26	1	26		26	1	26		26		26		26		26		26		26		26		26		26		26		26		26	2	26		26		26	1	26	1	26		26	1	26
27	1	27		27		27		27		27		27		27		27		27		27		27		27		27		27		27		27		27		27		27		27		27	1	27		27		27	1
28		28		28		28		28		28		28		28		28		28		28		28		28		28		28		28		28		28	1	28		28		28		28		28		28	1	28
29		29		29		29		29		29		29		29		29		29		29		29		29		29		29		29		29		29		29		29		29		29		29		29		29
30		30		30		30		30		30		30		30		30		30		30		30		30		30		30		30		30		30		30		30		30		30		30		30		30
[truncated: 4 more columns]

## Sheet: histograma mensal de frequência
	março		April	May	June	July	August	September	October	November	December	January
amostra/coordenada geográfica	comp(mm)	amostra/coordenada geográfica	shell lenght(mm)	shell lenght(mm)	shell lenght(mm)	shell lenght(mm)	shell lenght(mm)	shell lenght(mm)	shell lenght(mm)	shell lenght(mm)	shell lenght(mm)	shell lenght(mm)
A2			4.5	10.96	22.15	6.67	7.07	23.56	4.33	2.6	2.99	2.49
	3.13		4.52	11.47	20.49	9.41	7.8	20.49	5.69	2.76	2.99	2.5
	3.3		5.33	13.1	19.32	10.11	9.1	23.82	7.71	2.84	3.16	2.51
	3.6		5.59	13.18	19.29	15.74	9.22	21.27	11.27	2.92	3.22	2.52
	3.63		5.68	17.19	18.93	18.45	10.73	7.56	12.72	2.96	3.43	2.65
	3.67		5.71	17.2	18.64	18.75	11.7	7.65	12.77	3.03	3.46	2.72
	3.88		5.74	17.45	18.08	19.35	12.33	20.24	15.25	3.07	3.46	2.73
	4.1		6.25	18.26	17.8	21.57	13.83	15.35	17.54	3.12	3.51	2.84
A3	4.56	A6	6.52	18.36	17.74	24.04	14.35	10.18	17.69	3.13	3.52	2.87
	4.66		6.71	18.43	16.04	7.04	14.53	10.18	18.86	3.14	3.59	2.91
	4.85		6.87	18.81	16.03	10	14.56	10.44	18.9	3.21	3.65	2.96
	5.05		6.9	19.31	14.83	12.69	15.47	7.04	19.17	3.22	3.69	2.96
	5.37		6.94	19.55	10.97	16.06	16.43	20.26	20.71	3.23	3.89	3.06
	5.46		7.07	19.68	10.27	25.24	17.41	16.99	20.84	3.23	3.9	3.08
	6.27		7.51	20.33	9.09	6.81	17.99	12.64	21.14	3.3	3.9	3.09
	6.5		7.58	20.37	8.42	8.94	18.08	7.89	21.48	3.32	3.95	3.1
	6.9		7.69	20.46	8.09	9.88	18.14	16.31	21.75	3.32	4.05	3.11
	6.97		8.12	20.59	6.73	10.15	19.1	24.44	21.83	3.33	4.11	3.12
	7.18		8.2	20.61	6.1	12.31	19.12	21.63	21.925	3.33	4.12	3.15
	7.2		8.79	20.69	5.85	12.47	19.21	12.61	21.94	3.41	4.13	3.17
	7.4		9.17	20.76	5.38	22.02	19.21	12.07	22.1	3.45	4.17	3.18
	8.37		9.25	21.05	4.26	12.24	19.35	11.65	22.13	3.48	4.31	3.21
	8.51		9.29	21.47	19.32	16.39	19.62	21.66	22.42	3.54	4.49	3.22
	8.53		9.86	21.59	15.38	16.73	19.97	21.79	22.48	3.55	4.54	3.24
	9		11.08	21.8	11.22	17.77	20.05	19.12	22.49	3.58	4.57	3.24
	9.03		12.33	22.23	6.82	18.65	20.19	20.62	22.69	3.61	4.59	3.25
	9.16		13.37	22.46	4.99	18.82	20.73	20.02	23.54	3.64	4.6	3.25
	9.3		15.08	22.81	5.92	20.23	20.9	20.25	24.31	3.66	4.66	3.28
	9.43		16.64	22.94	6.4	21.04	21.12	21.08	24.8	3.67	4.67	3.31
	9.68		16.98	22.99	17.05	22.32	21.17	23.66	25.62	3.69	4.69	3.33
	10.28		17	23.09	17.04	23.58	21.4	5.79	25.8	3.7	4.76	3.34
	10.94	A7	17.1	23.16	17.76	18.43	21.4	21.14	26.09	3.7	4.8	3.35
	11.1		17.13	23.33	5.8	18.76	21.43	17.45	27.37	3.76	5.07	3.36
	11.31		17.46	23.55	2.67	18.82	21.87	19.29		3.77	5.14	3.38
	13.2		17.49	23.79	21.34	20.15	21.89	21.08	8.56	3.79	5.39	3.38
	15.14		17.81	24.86	25.64	20.49	21.9667	20.38	8.83	3.8	5.59	3.38
	16.2		17.87		20.21	20.62	22.06	9.54	10.21	3.81	5.76	3.43
	16.31		18.36	5.42	22.64	21.66	22.57	20.27	11.89	3.82	5.86	3.43
	16.56		18.57	5.65	21.22	21.74	22.66	21.14	12.09	3.84	5.99	3.43
	17.16		18.6	6.12	20.48	22.54	22.7		12.38	3.86	6.01	3.44
	17.24		19.07	7.15	21.48	18.13	23.26	21.97	12.49	3.87	6.01	3.44
	17.26	A8	19.15	7.71	16.1	18.26	23.33	20	13.49	3.89	6.24	3.45
	17.4		19.18	7.72	4.75	18.68		17.4	13.64	3.89	6.3	3.48
	17.53		19.22	7.82	21.37	19.14	5.51	22.69	14.06	3.9	7.09	3.51
	17.72		19.45	7.83	20.21	19.4	6.44	23.6	14.19	3.91	7.61	3.57
A4	17.94		19.54	7.85	20.83	19.84	9.85	11.32	15.27	3.96	7.65	3.57
	18.01		19.58	7.9	20.24	19.97	10.22	12.65	15.99	3.99	9.01	3.57
	18.25		19.73	8.47	19.82	21.49	10.38	10.26	16	4	10.77	3.59
	18.41		19.81	8.75	18.38	23.69	10.42	20.64	16.39	4.01	12.43	3.61
	18.56		19.83	8.76	15.21	23.93	11.09	17.46	16.67	4.01	12.94	3.64
	18.65		19.97	9.1	14.43	19.3	11.46	16.83	17.01	4.04	14.21	3.65
	18.69		20.06	9.17	12	19.32	11.88	20.38	17.19	4.05	14.4	3.67
	18.7		20.07	9.23	11.91		11.89	15.24	17.37	4.08	14.4	3.67
	18.74		20.28	9.69	21.35	10.53	12.21	11.21	17.68	4.08	14.52	3.72
	18.88	A9	20.44	10.12	20.5	13.77	12.29	13.07	17.79	4.09	15.21	3.73
	18.98		20.53	10.32	17.61	16.46	12.93	11.97	17.97	4.14	15.63	3.74
	19		20.54	10.35	13.02	19.74	13.8	20.44	18.1	4.17	15.65	3.74
	19.07		20.65	10.42	5.21	19.88	13.88	18.35	18.16	4.17	16.04	3.75
	19.35		20.69	10.58	24.98	21.2	13.9	13.8	18.24	4.18	16.5	3.77
	19.49		21.08	11.69	23.5	21.55	13.97	18.98	18.47	4.19	16.55	3.79
	19.73	A10	21.14	11.89	22.55	8.02	14.19	16.73	18.52	4.24	17.15	3.79
	20.05		21.38	12.15	22.33	8.73	14.25	18.03	18.56	4.27	17.21	3.81
	20.17		21.43	12.25	22.09	9.32	14.34	13.54	18.63	4.28	17.65	3.81
	20.19		21.45	12.64	21.82	11.44	14.63	13.25	18.66	4.31	17.69	3.83
	20.46		21.5	12.64	19.4	13.37	14.83	11.91	18.71	4.46	17.83	3.83
	20.52		21.58	12.92	21.1	13.59	14.84	11.8	18.75	4.49	18.15	3.83
	20.72		21.7	12.99	19.36	13.65	14.91	23.01	18.82	4.49	18.18	3.86
	20.81		21.76	13.05	18.86	14.31	14.96	17.29	18.89	4.49	18.59	3.87
	21.1		21.89	13.13		16.66	15.07	14.51	19.44	4.51	18.89	3.9
	21.41		22.13	13.38	20.4	18.89	15.38	11.36	19.67	4.52	19.21	3.9
	21.61		22.4	13.41	17.05	19.65	15.45	21.71	19.79	4.53	19.48	3.94
	21.67		22.6	13.66	10.69	8.69	15.63	21.93	19.85	4.54	19.48	3.96
	21.79		22.78	14.34	9.29	11.31	15.6571	19.58	19.88	4.54	19.52	3.97
	21.93		22.9	14.75	8.69	18.54	15.76	14.8	19.94	4.55	19.56	3.98
	22		23	14.86	21.06	19.86	15.81	18.01	20	4.58	19.6	4.01
	22.3		23.04	15.16	17.71	23.68	16.14	24.26	20.11	4.6	19.62	4.02
	22.42		23.68	15.53	16.14	23.85	16.21	21.37	21.03	4.6	19.96	4.03
	23.15		23.73	16.88	13.19	5.84	16.225	17.8	21.8	4.61	19.96	4.04
	23.25		24.4	16.92	13.09	8.24	16.25	18.73	22.01	4.61	20.25	4.04
	23.47		25.05	17.4	11.18	10.1	16.35	14.38	22.35	4.63	21.296	4.06
	23.81	B1		17.5	11.1	10.35	16.82	17.1	22.65	4.63	21.61	4.07
	24.34		4.33	17.86	10.21	12.58	16.97	13.77	22.76	4.67	21.61	4.08
	27.09		5.63	18.72	10	18.78	17.53	18.28	23	4.68	21.92	4.09
B1			6.16	18.8	9.67	18.9	17.62	16.7	23.73	4.68	22.64	4.09
	3.17		6.21	18.83	9.33	6.65	17.72	16.1	23.88	4.72	23.06	4.11
	3.44		6.24	19.56	8.71	6.96	17.91	15.99	24.73	4.8	23.54	4.12
	3.44		6.44	19.57	7.35	8.38	18.01	11.8	24.98	4.81	23.62	4.14
	3.78		6.46	19.78	4.71	10.09	18.06	14.25	25.12	4.82	27.59	4.16
	3.92		6.49	19.84	4.25	10.36	18.17	18.05		4.86		4.18
	4.39		6.57	20.89	3.79	12.16	18.74	18.63	5.94	4.96		4.19
	4.53		6.79	20.97	11.17	12.24	18.74	16.49	7.46	5.03		4.19
	4.58		6.85	21.2	12.23	12.45	18.89	14.85	8.05	5.06		4.2
	4.6		6.9	21.38	14.2	13.22	18.97	16.12	8.91	5.21		4.21
	4.62		7.38	21.44	18.43	22.92	18.97	17.69	11.42	5.24		4.21
	4.66		7.45	21.92	19.75	10.54	19.06	21.58	12.82	5.24		4.24
	4.9		7.52	22.52	18.95	10.75	19.18	17.37	13.46	5.25		4.24
	5.14		8.25	23.6	16	11.58	19.44	22.09	13.93	5.26		4.29
	5.57		8.4	24.32	19.37	11.95	19.61	17.2	14.21	5.32		4.31
	5.67		9.25	25.54	11.05	12.74	19.87	15.89	14.66	5.32		4.31
	6.01		9.27		12.05	13.19	19.92	17.4	15.44	5.35		4.32
	6.28		9.53	5.7	10.33	13.72	20.12	13.58	16.96	5.39		4.39
	6.48		9.62	6.17	10.24	13.97	21.2	10.53	17.35	5.4		4.4
	7.67		9.75	7.77	3.27	14.29	21.29	10.97	17.68	5.41		4.4
	7.99	B2	9.78	7.86	22.54	14.68	21.57	9.8	17.82	5.41		4.42
	8.09		9.91	8.55	19.61	14.89	21.58	22	18.53	5.43		4.43
	8.42		9.95	9.4	16.67	15.1	22.16	22.75	19.01	5.51		4.44
	8.93		9.98	10.35	16.55	6.67	22.4	19.74	19.2	5.54		4.49
	8.94		10.56	10.37	14.41	8.21		18.93	19.39	5.59		4.52
B2	9.04		10.59	13	11.11	8.41	5.4	24.21	19.45	5.6		4.53
	9.44		10.69	14.55	11.89	9.97	6.8	22.31	19.62	5.62		4.56
	9.58		10.81	14.77	15.27	10.65	8.17	16.64	20.06	5.65		4.58
	9.72		10.92	15.45	19.71	11.87	8.87	19.44	20.15	5.67		4.59
	9.93		10.99	15.48	13.77	12.49	9.15	16.26	20.33	5.71		4.61
	10.13		11.39	16.65	19.37	12.64	9.77	22.53	20.5	5.73		4.62
	10.23		11.61	16.67	12.62	12.99	9.79	17.76	20.7	5.76		4.63
	10.25		12.01	16.82	7.75	13.49	10	20.42	21.1	5.76		4.67
	10.47		12.11	16.9	9.06	13.91	10.7	21.91	21.69	5.76		4.72
	10.58		12.22	16.9	10.52	14.02	12.19	20.07	21.71	5.78		4.73
	10.61		12.36	16.95		14.3	12.35	20.72	22.19	5.85		4.76
	10.75		12.41	17	15.36	14.43	12.58	23.86	22.34	5.93		4.78
	10.79		12.44	17.92	21.35	14.81	12.65	20.81	22.56	5.95		4.78
	10.93		12.49	18.11	24.42	16.76	13.47	25.02	22.57	6.02		4.78
	11.15		12.67	18.2	23.78	8.315	14.62	20.8	22.63	6.12		4.79
	11.4		12.69	18.25	15.13	10.09	14.68	20.86	22.73	6.13		4.84
	11.53		12.73	18.65	10.75	10.67	14.96	21.33	23.01	6.19		4.86
	11.68		12.97	18.66	12	11.45	15.21	23.73	23.14	6.21		4.86
	11.74		13.01	18.96	11.34	12.22	15.31	21.11	23.33	6.47		4.89
	11.81		13.09	19.08	13.49	15.56	15.4	21.63	23.35	6.49		4.92
	12.26		13.23	19.57	22.95	7.43	15.45	18.58	23.59	6.93		4.94
	12.41	B3	13.24	19.6	22.33	7.86	15.54	20.3	23.83	7.53		4.95
	12.5		13.27	19.73	19.97	13.86	15.62	17.54	23.89	7.68		4.95
	12.85		13.3	19.79	19.14	14.29	15.71	13.49	24.24	8.02		4.95
	13		13.34	19.84	17.02	15	16.95	20.19	24.58	8.03		5.01
	13.18		13.4	19.86	16.14	15.02	17.29	21.03	24.69	8.14		5.02
	13.23		13.54	19.97	15.72	15.43	17.78	20.23	24.95	8.49		5.03
	14.05		13.67	20.86	15.38	15.56	18.03		25.05	9.36		5.1
	14.7		13.78	20.98	14.69	15.87	18.76	19.73	25.41	9.48		5.11
	15.33		13.95	21.03	13.02	17.05	18.98	11.78	25.79	9.53		5.17
	16.94		14.12	21.23	11.69	18.55	18.99	22.22	25.97	10.14		5.2
	17.09	B4	14.25	21.38	10.02	19.25	19.57	21.72	26.5	10.65		5.22
	17.14		14.66	21.4	9.55	19.73	19.86	10.33	28.46	15.27		5.23
	17.35		15.31	21.57	8.43	22.02	20.28	22.44		15.44		5.25
	17.5		15.35	21.64	5.82		20.69	18.69		16.2		5.37
	17.93		15.52	21.83	8.44	20.36	20.86	26.12		16.61		5.43
	18.15		15.86	22.15	9.12	24.15	20.93	22.38		17.48		5.47
	18.18		16.36	22.27	9.13	18.66	21.06	22.48		17.9		5.48
B3	18.33		16.73	22.38	18.09	6.78	21.1	10.59		17.92		5.5
	18.57		17.16	22.81	19.72	8.04	21.31	8.47		18.21		5.53
	18.6		17.27	23.37	20.32	8.06	21.73	21.81		18.44		5.54
	18.68		17.81	23.6	21.27	15.02	21.83	25.52		18.85		5.56
	18.78		17.82	23.64	24.86	18.91	22.06	25.35		19.48		5.6
	18.79	B5	17.98	23.71	10.7	21.74	22.42	19.39		20.26		5.61
	18.98		18.02	24.49	11.07	21.8	22.93	19.85		20.45		5.63
	19.2		18.62	25.16	25.68	21.9	25.97	18.74		20.76		5.69
	19.24		18.7	25.22	24.66	22.77	26.03	15.59		21.64		5.78
	19.29		18.98		24.47	12.81	28.48	15.82		21.77		5.84
	19.34		19.09		23.56	20.34		7.59		22.57		5.85
	19.39		19.09		23.06	20.62		6.03		22.62		5.93
	19.39		19.24		19.62	22.38		23.73		22.63		5.95
	19.58	B6	19.24		16.75	23.08		24.4		22.7		5.99
	19.6		19.29		15.83	24.6		12.17		22.72		6.01
	19.66		19.33		13	16.87		24.31		23.15		6.05
	20.1		19.39		11.25	21.68		22.29		23.59		6.07
	20.15		19.4		24.68	6.06		22.55		24.03		6.09
	20.16		19.62		21.77	12.36		25.02		24.06		6.19
	20.21		19.62		20.83	16.1		12.09		24.82		6.2
	20.43		19.64		20.16	17.04		21.82		24.86		6.34
	20.44		19.64		19.96	17.42		24.06				6.47
	20.44	B7	19.68		19.79	18.91		15.55				6.61
B4	20.49		19.78		19.57	20		13.92				6.75
	20.53		19.82		18.72	20.27		11.47				6.78
	20.62		19.93		16.68	21.54		11.55				6.93
	20.65		20.23		13.16	21.76		9.08				7.04
	20.74		20.3		21.82	23.14						7.05
B6	20.77		20.33		24.9	23.65						7.05
	20.99		20.34		23.79	24.59						7.14
	21.17		20.4		23.54	24.73						7.7
	21.55		20.56		22.81							7.77
	22.59		20.65		22	22.46						8.88
B10	22.59		20.72		21.39	14.22						14.99
	22.67		20.83		19.66	19.29						15.51
	23.74	B8	20.83		12.6	21.15						16.21
	24.03		20.85		6.69	15.4						16.25
			20.85			20.19						17.13
C1			20.94			20.95						17.36
	2.93		20.97			21.14						17.78
	3.64		21			21.97						17.95
	3.8		21.01			22.27						18.05
	3.81		21.05			23.25						18.27
	4.09		21.14			23.68						18.27
	4.36		21.21									18.38
	4.37		21.27									18.53
	4.67	B9	21.39									18.59
	4.92		21.41									18.67
	5.1		21.48									18.74
	5.19		21.49									18.95
	5.73		21.55									19.04
	6.73		21.7									19.26
	7.09		21.75									19.43
	7.77		21.79									19.48
	9.51		21.98									19.51
	9.94		22.13									19.51
	10.36		22.16									19.62
	10.55		22.18									19.74
	10.72		22.28									19.76
	10.77		22.47									20.38
	11.36		22.86									20.41
	11.42		23.05									20.41
	13.23		23.22									20.58
	13.23		23.31									20.71
	13.56		23.35									20.72
	14.27		26.69									20.86
	14.59	C1										20.9
	14.69		4.49									21.28
	14.964		5.59									21.37
	15.07		6.03									21.46
	15.12		6.32									21.56
	15.35		7.14									21.62
	15.37	C2	7.5									21.85
	15.44		6.73									21.86
	15.81		7.77									21.93
	15.97		7.8									22.03
	16.8		7.97									22.06
	17.04		8.45									22.14
	17.81		8.65									22.31
	18.12		8.72									22.36
	18.13		8.76									22.5
	18.21		9									22.54
	18.27		9.01									22.94
	18.7		9.15									22.94
	18.74		9.16									23.06
	18.87		9.43									23.26
	19.01		9.52									23.58
	19.09		9.79									24.85
	19.19		9.8
	19.22		9.84
	19.48		9.98
	19.71		10.06
	19.87	C3	10.52
	19.87		10.63
	20.27		10.68
	20.52		12.05
	20.54		12.95
	20.86		13.51
	21		14.69
	21.11		15.95
	21.12		16.42
	21.13	C4	16.52
	21.16		16.72
	21.3		16.83
	21.34		17.08
	21.4		17.14
	21.42		17.16
	21.67		17.71
	21.79		17.88
	21.85		18.58
	21.86		19.08
	21.99		19.38
	22	C5	19.63
	22.09		19.76
	22.13		19.77
	22.24		19.83
	22.3		19.86
	22.67		20.02
	23.05	C6	20.03
	23.21		20.11
	23.27		20.51
	23.47		20.82
	23.51		20.99
	23.94		21.08
	24.09		21.11
	24.71		21.22
	24.71		21.49
	24.72		21.58
	24.76		21.67
	25.25		21.68
	25.52		21.68
	26.86		22.11
			22.41
			22.54
			22.66
			22.68
			22.82
			23.03
			23.05
			23.95
			24.04
			24.29
			24.47
			25.6
			25.81
			25.91
